# Supplementary material
Source: publisher site journal article supplement (https://www.spandidos-publications.com/1267/downloadSupplementary)
Supplement: Supplementary file 1 [file downloadSupplementary]

## Sheet: TABLE SIII
Table SIII. SILAC‑iPAC biotinylated proteins from SPPLAT. Quantification was performed using MaxQuant. n=3 replicates. SPPLAT, specific proteomic proximity labelling assay using tyramide; SILAC, stable isotope labelling of amino acids in culture.
Protein groups	LogFC	P-value	Primary identifier	Gene ID	Protein name	Length	cellular location	Gene ontology (cellular component)	Gene ontology (biological process)	Gene ontology (molecular function)
Q96RQ3;E9PHF7;F5GYT8;E9PG35;G5E9X5;F8WDI3	0.544085	0.439948	Q96RQ3	MCCC1	Methylcrotonoyl-CoA carboxylase subunit alpha, mitochondrial (MCCase subunit alpha) (EC 6.4.1.4) (3-methylcrotonyl-CoA carboxylase 1) (3-methylcrotonyl-CoA carboxylase biotin-containing subunit) (3-methylcrotonyl-CoA:carbon dioxide ligase subunit alpha)	725	x	3-methylcrotonyl-CoA carboxylase complex, mitochondrial [GO:0002169]; cytosol [GO:0005829]; methylcrotonoyl-CoA carboxylase complex [GO:1905202]; mitochondrial inner membrane [GO:0005743]; mitochondrial matrix [GO:0005759]; mitochondrion [GO:0005739]	biotin metabolic process [GO:0006768]; branched-chain amino acid catabolic process [GO:0009083]; leucine catabolic process [GO:0006552]; protein heterooligomerization [GO:0051291]	ATP binding [GO:0005524]; biotin binding [GO:0009374]; biotin carboxylase activity [GO:0004075]; metal ion binding [GO:0046872]; methylcrotonoyl-CoA carboxylase activity [GO:0004485]
Q9HCC0;D6RD67;D6RDF7;D6R9R1;A0A0G2JM88	0.0388916	0.00539765	Q9HCC0	MCCC2	Methylcrotonoyl-CoA carboxylase beta chain, mitochondrial (MCCase subunit beta) (EC 6.4.1.4) (3-methylcrotonyl-CoA carboxylase 2) (3-methylcrotonyl-CoA carboxylase non-biotin-containing subunit) (3-methylcrotonyl-CoA:carbon dioxide ligase subunit beta)	563	x	3-methylcrotonyl-CoA carboxylase complex, mitochondrial [GO:0002169]; cytosol [GO:0005829]; methylcrotonoyl-CoA carboxylase complex [GO:1905202]; mitochondrial matrix [GO:0005759]; mitochondrion [GO:0005739]	biotin metabolic process [GO:0006768]; branched-chain amino acid catabolic process [GO:0009083]; coenzyme A metabolic process [GO:0015936]; leucine catabolic process [GO:0006552]; protein heterooligomerization [GO:0051291]	ATP binding [GO:0005524]; methylcrotonoyl-CoA carboxylase activity [GO:0004485]
O75691	2.19122	1.71331	O75691	UTP20	Small subunit processome component 20 homolog (Down-regulated in metastasis protein) (Novel nucleolar protein 73) (NNP73) (Protein Key-1A6)	2785	n	90S preribosome [GO:0030686]; cytoplasm [GO:0005737]; nucleolus [GO:0005730]; nucleoplasm [GO:0005654]; plasma membrane [GO:0005886]; preribosome, small subunit precursor [GO:0030688]; small-subunit processome [GO:0032040]	endonucleolytic cleavage in 5'-ETS of tricistronic rRNA transcript (SSU-rRNA, 5.8S rRNA, LSU-rRNA) [GO:0000480]; endonucleolytic cleavage in ITS1 to separate SSU-rRNA from 5.8S rRNA and LSU-rRNA from tricistronic rRNA transcript (SSU-rRNA, 5.8S rRNA, LSU-rRNA) [GO:0000447]; endonucleolytic cleavage to generate mature 5'-end of SSU-rRNA from (SSU-rRNA, 5.8S rRNA, LSU-rRNA) [GO:0000472]; maturation…	RNA binding [GO:0003723]
P62081;B5MCP9	0.333774	0.271753	P62081	RPS7	40S ribosomal protein S7 (Small ribosomal subunit protein eS7)	194	n	90S preribosome [GO:0030686]; cytosol [GO:0005829]; cytosolic small ribosomal subunit [GO:0022627]; extracellular exosome [GO:0070062]; extracellular matrix [GO:0031012]; focal adhesion [GO:0005925]; intracellular ribonucleoprotein complex [GO:0030529]; membrane [GO:0016020]; microtubule organizing center [GO:0005815]; nucleolus [GO:0005730]; nucleoplasm [GO:0005654]; nucleus [GO:0005634]; protei…	cell differentiation [GO:0030154]; cytoplasmic translation [GO:0002181]; negative regulation of protein ubiquitination involved in ubiquitin-dependent protein catabolic process [GO:2000059]; negative regulation of ubiquitin protein ligase activity [GO:1904667]; neural tube closure [GO:0001843]; nuclear-transcribed mRNA catabolic process, nonsense-mediated decay [GO:0000184]; positive regulation o…	mRNA 3'-UTR binding [GO:0003730]; mRNA 5'-UTR binding [GO:0048027]; RNA binding [GO:0003723]; structural constituent of ribosome [GO:0003735]; ubiquitin ligase inhibitor activity [GO:1990948]
Q9H583;Q5T3Q7;Q6P664	-0.294249	0.194741	Q9H583	HEATR1	HEAT repeat-containing protein 1 (Protein BAP28) (U3 small nucleolar RNA-associated protein 10 homolog) [Cleaved into: HEAT repeat-containing protein 1, N-terminally processed]	2144	n	90S preribosome [GO:0030686]; fibrillar center [GO:0001650]; membrane [GO:0016020]; mitochondrion [GO:0005739]; nucleolus [GO:0005730]; nucleoplasm [GO:0005654]; small-subunit processome [GO:0032040]; t-UTP complex [GO:0034455]	maturation of SSU-rRNA from tricistronic rRNA transcript (SSU-rRNA, 5.8S rRNA, LSU-rRNA) [GO:0000462]; positive regulation of rRNA processing [GO:2000234]; positive regulation of transcription from RNA polymerase I promoter [GO:0045943]; rRNA processing [GO:0006364]; transcription, DNA-templated [GO:0006351]	RNA binding [GO:0003723]; snoRNA binding [GO:0030515]
O76021;J3QSV6;I3L3C4;I3L3U9;I3L234	-0.640287	0.607537	O76021	RSL1D1	Ribosomal L1 domain-containing protein 1 (CATX-11) (Cellular senescence-inhibited gene protein) (Protein PBK1)	490	n	90S preribosome [GO:0030686]; membrane [GO:0016020]; nucleolus [GO:0005730]	maturation of LSU-rRNA [GO:0000470]; osteoblast differentiation [GO:0001649]; regulation of apoptotic process [GO:0042981]; regulation of cellular senescence [GO:2000772]; regulation of protein localization [GO:0032880]	cadherin binding [GO:0045296]; mRNA 3'-UTR binding [GO:0003730]; mRNA 5'-UTR binding [GO:0048027]; RNA binding [GO:0003723]
Q14692	-2.19093	1.45142	Q14692	BMS1	Ribosome biogenesis protein BMS1 homolog (Ribosome assembly protein BMS1 homolog)	1282	n	90S preribosome [GO:0030686]; nucleolus [GO:0005730]; nucleoplasm [GO:0005654]; nucleus [GO:0005634]	endonucleolytic cleavage of tricistronic rRNA transcript (SSU-rRNA, 5.8S rRNA, LSU-rRNA) [GO:0000479]; maturation of SSU-rRNA from tricistronic rRNA transcript (SSU-rRNA, 5.8S rRNA, LSU-rRNA) [GO:0000462]; ribosome assembly [GO:0042255]; rRNA processing [GO:0006364]	ATP binding [GO:0005524]; GTPase activity [GO:0003924]; GTP binding [GO:0005525]; RNA binding [GO:0003723]; U3 snoRNA binding [GO:0034511]
P61313;E7EX53;E7EQV9;E7ENU7	0.24422	0.159092	P61313	RPL15	60S ribosomal protein L15 (Large ribosomal subunit protein eL15)	204	x	A band [GO:0031672]; cytosol [GO:0005829]; cytosolic large ribosomal subunit [GO:0022625]; extracellular exosome [GO:0070062]; membrane [GO:0016020]; nucleus [GO:0005634]; ribosome [GO:0005840]	cytoplasmic translation [GO:0002181]; nuclear-transcribed mRNA catabolic process, nonsense-mediated decay [GO:0000184]; response to ethanol [GO:0045471]; rRNA processing [GO:0006364]; SRP-dependent cotranslational protein targeting to membrane [GO:0006614]; translation [GO:0006412]; translational initiation [GO:0006413]; viral transcription [GO:0019083]	cadherin binding [GO:0045296]; RNA binding [GO:0003723]; structural constituent of ribosome [GO:0003735]
Q9NRL2	9.14195	2.20649	Q9NRL2	BAZ1A	Bromodomain adjacent to zinc finger domain protein 1A (ATP-dependent chromatin-remodeling protein) (ATP-utilizing chromatin assembly and remodeling factor 1) (hACF1) (CHRAC subunit ACF1) (Williams syndrome transcription factor-related chromatin-remodeling factor 180) (WCRF180) (hWALp1)	1556	x	ACF complex [GO:0016590]; CHRAC [GO:0008623]	chromatin remodeling [GO:0006338]; DNA-dependent DNA replication [GO:0006261]; regulation of transcription, DNA-templated [GO:0006355]; transcription, DNA-templated [GO:0006351]	metal ion binding [GO:0046872]
P61160;F5H6T1;A0A1B0GWD0;A0A1B0GWH0	0.330634	0.357499	P61160	ACTR2	Actin-related protein 2 (Actin-like protein 2)	394	x	actin cap [GO:0030478]; actin cytoskeleton [GO:0015629]; Arp2/3 protein complex [GO:0005885]; azurophil granule lumen [GO:0035578]; cytoplasm [GO:0005737]; cytosol [GO:0005829]; extracellular exosome [GO:0070062]; extracellular region [GO:0005576]; ficolin-1-rich granule lumen [GO:1904813]; focal adhesion [GO:0005925]; invadopodium [GO:0071437]; lamellipodium [GO:0030027]; membrane [GO:0016020]; …	Arp2/3 complex-mediated actin nucleation [GO:0034314]; associative learning [GO:0008306]; asymmetric cell division [GO:0008356]; cellular response to trichostatin A [GO:0035984]; cilium assembly [GO:0060271]; cytosolic transport [GO:0016482]; ephrin receptor signaling pathway [GO:0048013]; establishment or maintenance of cell polarity [GO:0007163]; Fc-gamma receptor signaling pathway involved in …	actin binding [GO:0003779]; ATP binding [GO:0005524]; structural constituent of cytoskeleton [GO:0005200]
P68133;P68032;P63267;P62736;A6NL76;F8WB63;B8ZZJ2;C9JFL5;F6UVQ4;F6QUT6	0.646378	0.773112	P68133	ACTA1	Actin, alpha skeletal muscle (Alpha-actin-1)	377	c	actin cytoskeleton [GO:0015629]; actin filament [GO:0005884]; blood microparticle [GO:0072562]; cell body [GO:0044297]; cytosol [GO:0005829]; extracellular exosome [GO:0070062]; extracellular space [GO:0005615]; filopodium [GO:0030175]; lamellipodium [GO:0030027]; sarcomere [GO:0030017]; stress fiber [GO:0001725]; striated muscle thin filament [GO:0005865]	cell growth [GO:0016049]; mesenchyme migration [GO:0090131]; muscle contraction [GO:0006936]; muscle filament sliding [GO:0030049]; positive regulation of gene expression [GO:0010628]; response to extracellular stimulus [GO:0009991]; response to lithium ion [GO:0010226]; response to mechanical stimulus [GO:0009612]; response to steroid hormone [GO:0048545]; skeletal muscle fiber adaptation [GO:00…	ADP binding [GO:0043531]; ATP binding [GO:0005524]; myosin binding [GO:0017022]; structural constituent of cytoskeleton [GO:0005200]
P35579;P35749;B1AH99;E7ERA5;Q5BKV1;P35580	-0.601487	0.732323	P35579	MYH9	Myosin-9 (Cellular myosin heavy chain, type A) (Myosin heavy chain 9) (Myosin heavy chain, non-muscle IIa) (Non-muscle myosin heavy chain A) (NMMHC-A) (Non-muscle myosin heavy chain IIa) (NMMHC II-a) (NMMHC-IIA)	1960	c	actin cytoskeleton [GO:0015629]; actomyosin [GO:0042641]; actomyosin contractile ring [GO:0005826]; brush border [GO:0005903]; cell-cell adherens junction [GO:0005913]; cell leading edge [GO:0031252]; cleavage furrow [GO:0032154]; cytoplasm [GO:0005737]; cytosol [GO:0005829]; extracellular exosome [GO:0070062]; extracellular matrix [GO:0031012]; focal adhesion [GO:0005925]; immunological synapse …	actin cytoskeleton reorganization [GO:0031532]; actin filament-based movement [GO:0030048]; actomyosin structure organization [GO:0031032]; angiogenesis [GO:0001525]; blood vessel endothelial cell migration [GO:0043534]; cytokinetic process [GO:0032506]; establishment of meiotic spindle localization [GO:0051295]; establishment of T cell polarity [GO:0001768]; integrin-mediated signaling pathway […	actin binding [GO:0003779]; actin-dependent ATPase activity [GO:0030898]; actin filament binding [GO:0051015]; ADP binding [GO:0043531]; ATPase activity [GO:0016887]; ATP binding [GO:0005524]; cadherin binding [GO:0045296]; calmodulin binding [GO:0005516]; microfilament motor activity [GO:0000146]; motor activity [GO:0003774]; protein anchor [GO:0043495]; protein domain specific binding [GO:00199…
P14923;C9JTX4;C9J826;C9JK18;C9JKY1	4.55497	0.793336	P14923	JUP	Junction plakoglobin (Catenin gamma) (Desmoplakin III) (Desmoplakin-3)	745	c	actin cytoskeleton [GO:0015629]; apicolateral plasma membrane [GO:0016327]; catenin complex [GO:0016342]; cell-cell adherens junction [GO:0005913]; cell-cell junction [GO:0005911]; cornified envelope [GO:0001533]; cytoplasm [GO:0005737]; cytoplasmic side of plasma membrane [GO:0009898]; cytoskeleton [GO:0005856]; cytosol [GO:0005829]; desmosome [GO:0030057]; extracellular exosome [GO:0070062]; ex…	adherens junction assembly [GO:0034333]; adherens junction organization [GO:0034332]; bundle of His cell-Purkinje myocyte adhesion involved in cell communication [GO:0086073]; cell migration [GO:0016477]; cellular response to indole-3-methanol [GO:0071681]; cornification [GO:0070268]; cytoskeletal anchoring at plasma membrane [GO:0007016]; desmosome assembly [GO:0002159]; detection of mechanical …	alpha-catenin binding [GO:0045294]; cadherin binding [GO:0045296]; cell adhesion molecule binding [GO:0050839]; cell adhesive protein binding involved in bundle of His cell-Purkinje myocyte communication [GO:0086083]; protein homodimerization activity [GO:0042803]; protein kinase binding [GO:0019901]; protein phosphatase binding [GO:0019903]; signal transducer activity [GO:0004871]; structural co…
P61158;B4DXW1;F8WDR7;Q9P1U1;F8WEW2;F8WE84	-0.27174	0.288227	P61158	ACTR3	Actin-related protein 3 (Actin-like protein 3)	418	c	actin cytoskeleton [GO:0015629]; Arp2/3 protein complex [GO:0005885]; brush border [GO:0005903]; cell-cell junction [GO:0005911]; cytosol [GO:0005829]; extracellular exosome [GO:0070062]; focal adhesion [GO:0005925]; lamellipodium [GO:0030027]; membrane [GO:0016020]	Arp2/3 complex-mediated actin nucleation [GO:0034314]; asymmetric cell division [GO:0008356]; cilium assembly [GO:0060271]; ephrin receptor signaling pathway [GO:0048013]; establishment or maintenance of cell polarity [GO:0007163]; Fc-gamma receptor signaling pathway involved in phagocytosis [GO:0038096]; meiotic chromosome movement towards spindle pole [GO:0016344]; meiotic cytokinesis [GO:00332…	actin binding [GO:0003779]; ATP binding [GO:0005524]; structural constituent of cytoskeleton [GO:0005200]
O15144;C9JTV5;G5E9J0;G5E9S7;H7C3F9	0.381423	0.339185	O15144	ARPC2	Actin-related protein 2/3 complex subunit 2 (Arp2/3 complex 34 kDa subunit) (p34-ARC)	300	c	actin cytoskeleton [GO:0015629]; Arp2/3 protein complex [GO:0005885]; cell leading edge [GO:0031252]; cytosol [GO:0005829]; endosome [GO:0005768]; extracellular exosome [GO:0070062]; focal adhesion [GO:0005925]; muscle cell projection membrane [GO:0036195]; neuron projection [GO:0043005]; synapse [GO:0045202]	actin filament polymerization [GO:0030041]; Arp2/3 complex-mediated actin nucleation [GO:0034314]; ephrin receptor signaling pathway [GO:0048013]; Fc-gamma receptor signaling pathway involved in phagocytosis [GO:0038096]; membrane organization [GO:0061024]; movement of cell or subcellular component [GO:0006928]; positive regulation of lamellipodium assembly [GO:0010592]; positive regulation of su…	actin binding [GO:0003779]; structural constituent of cytoskeleton [GO:0005200]
O15145;C9JZD1;F8VR50	0.614232	0.651003	O15145	ARPC3	Actin-related protein 2/3 complex subunit 3 (Arp2/3 complex 21 kDa subunit) (p21-ARC)	178	c	actin cytoskeleton [GO:0015629]; Arp2/3 protein complex [GO:0005885]; cytosol [GO:0005829]; extracellular exosome [GO:0070062]; filamentous actin [GO:0031941]; focal adhesion [GO:0005925]; growth cone leading edge [GO:0061850]; lamellipodium [GO:0030027]; membrane [GO:0016020]	Arp2/3 complex-mediated actin nucleation [GO:0034314]; cellular response to nerve growth factor stimulus [GO:1990090]; ephrin receptor signaling pathway [GO:0048013]; Fc-gamma receptor signaling pathway involved in phagocytosis [GO:0038096]; membrane organization [GO:0061024]; movement of cell or subcellular component [GO:0006928]	actin binding [GO:0003779]; structural constituent of cytoskeleton [GO:0005200]
O15143;A0A1W2PNV4;C9J4Z7;F8VXW2;C9JEY1;C9JQM8;C9JFG9;C9J6C8;C9JBJ7;C9K057;C9JTT6	-0.843939	0.758091	O15143	ARPC1B	Actin-related protein 2/3 complex subunit 1B (Arp2/3 complex 41 kDa subunit) (p41-ARC)	372	c	actin cytoskeleton [GO:0015629]; Arp2/3 protein complex [GO:0005885]; cytosol [GO:0005829]; extracellular exosome [GO:0070062]; focal adhesion [GO:0005925]; tubulobulbar complex [GO:0036284]	Arp2/3 complex-mediated actin nucleation [GO:0034314]; ephrin receptor signaling pathway [GO:0048013]; Fc-gamma receptor signaling pathway involved in phagocytosis [GO:0038096]; movement of cell or subcellular component [GO:0006928]; response to estradiol [GO:0032355]; response to estrogen [GO:0043627]	actin binding [GO:0003779]; protein complex binding [GO:0032403]; structural constituent of cytoskeleton [GO:0005200]
P47755;C9JUG7;F8W9N7;A0A0D9SET8	0.427262	0.367917	P47755	CAPZA2	F-actin-capping protein subunit alpha-2 (CapZ alpha-2)	286	c	actin cytoskeleton [GO:0015629]; brush border [GO:0005903]; cortical cytoskeleton [GO:0030863]; cytosol [GO:0005829]; extracellular exosome [GO:0070062]; extracellular region [GO:0005576]; F-actin capping protein complex [GO:0008290]; membrane [GO:0016020]	barbed-end actin filament capping [GO:0051016]; blood coagulation [GO:0007596]; innate immune response [GO:0045087]; movement of cell or subcellular component [GO:0006928]; protein complex assembly [GO:0006461]	actin binding [GO:0003779]
Q09666	1.18054	0.486414	Q09666	AHNAK	Neuroblast differentiation-associated protein AHNAK (Desmoyokin)	5890	c	actin cytoskeleton [GO:0015629]; cell-cell contact zone [GO:0044291]; costamere [GO:0043034]; cytoplasm [GO:0005737]; cytosol [GO:0005829]; extracellular exosome [GO:0070062]; focal adhesion [GO:0005925]; lysosomal membrane [GO:0005765]; membrane [GO:0016020]; nucleus [GO:0005634]; plasma membrane [GO:0005886]; sarcolemma [GO:0042383]; T-tubule [GO:0030315]; vesicle [GO:0031982]	protein oligomerization [GO:0051259]; regulation of RNA splicing [GO:0043484]; regulation of voltage-gated calcium channel activity [GO:1901385]	cadherin binding [GO:0045296]; RNA binding [GO:0003723]; S100 protein binding [GO:0044548]; structural molecule activity conferring elasticity [GO:0097493]
B1AKD8;Q5TZA2	-0.188806	0.0417612	B1AKD8	CROCC	Rootletin (Fragment)	1311	c	actin cytoskeleton [GO:0015629]; centrosome [GO:0005813]; ciliary rootlet [GO:0035253]; cytosol [GO:0005829]; plasma membrane [GO:0005886]	centrosome cycle [GO:0007098]
P52907	0.379884	0.408	P52907	CAPZA1	F-actin-capping protein subunit alpha-1 (CapZ alpha-1)	286	c	actin cytoskeleton [GO:0015629]; cytoskeleton [GO:0005856]; cytosol [GO:0005829]; extracellular exosome [GO:0070062]; extracellular region [GO:0005576]; F-actin capping protein complex [GO:0008290]; WASH complex [GO:0071203]	barbed-end actin filament capping [GO:0051016]; blood coagulation [GO:0007596]; innate immune response [GO:0045087]; movement of cell or subcellular component [GO:0006928]; protein complex assembly [GO:0006461]	actin binding [GO:0003779]; cadherin binding [GO:0045296]
H0Y2S9;H0Y7E2;H7C3G6;J3KSW8;Q6WCQ1	2.23355	1.47556	H0Y2S9	MPRIP	Myosin phosphatase Rho-interacting protein (Fragment)	1794	c	actin cytoskeleton [GO:0015629]; cytosol [GO:0005829]
Q13085;Q59FY4;O00763;A0A087X0W4;S4R3S7;F8W8T8;H0YGH5;A0A0C4DGT1;A0A087WWN5;A0A087X2F8;A0A087X126;A0A087WYK6;A0A087WVR6;A0A087WYS8	-0.209396	0.119556	Q13085	ACACA	Acetyl-CoA carboxylase 1 (ACC1) (EC 6.4.1.2) (ACC-alpha) [Includes: Biotin carboxylase (EC 6.3.4.14)]	2346	c	actin cytoskeleton [GO:0015629]; cytosol [GO:0005829]; extracellular exosome [GO:0070062]; fibrillar center [GO:0001650]; mitochondrion [GO:0005739]	acetyl-CoA metabolic process [GO:0006084]; biotin metabolic process [GO:0006768]; carnitine shuttle [GO:0006853]; cellular response to prostaglandin E stimulus [GO:0071380]; fatty acid biosynthetic process [GO:0006633]; fatty-acyl-CoA biosynthetic process [GO:0046949]; lipid homeostasis [GO:0055088]; malonyl-CoA biosynthetic process [GO:2001295]; multicellular organismal protein metabolic process…	acetyl-CoA carboxylase activity [GO:0003989]; ATP binding [GO:0005524]; biotin carboxylase activity [GO:0004075]; metal ion binding [GO:0046872]
Q9HCD5	-0.503456	0.472125	Q9HCD5	NCOA5	Nuclear receptor coactivator 5 (NCoA-5) (Coactivator independent of AF-2) (CIA)	579	c	actin cytoskeleton [GO:0015629]; extracellular space [GO:0005615]; nucleus [GO:0005634]	glucose homeostasis [GO:0042593]; negative regulation of insulin receptor signaling pathway [GO:0046627]; regulation of transcription, DNA-templated [GO:0006355]; transcription, DNA-templated [GO:0006351]	chromatin binding [GO:0003682]; RNA binding [GO:0003723]
P07305	0.553563	0.628276	P07305	H1F0	Histone H1.0 (Histone H1') (Histone H1(0)) [Cleaved into: Histone H1.0, N-terminally processed]	194	c	actin cytoskeleton [GO:0015629]; Golgi apparatus [GO:0005794]; nuclear body [GO:0016604]; nuclear chromatin [GO:0000790]; nuclear euchromatin [GO:0005719]; nucleoplasm [GO:0005654]; nucleosome [GO:0000786]; nucleus [GO:0005634]	apoptotic DNA fragmentation [GO:0006309]; nucleosome assembly [GO:0006334]	AT DNA binding [GO:0003680]; chromatin DNA binding [GO:0031490]; RNA binding [GO:0003723]
Q9BR76;A0A087WW53;F5H390;F5H0D2	0.319465	0.166597	Q9BR76	CORO1B	Coronin-1B (Coronin-2)	489	c	actin filament [GO:0005884]; cell leading edge [GO:0031252]; cell periphery [GO:0071944]; cytoplasm [GO:0005737]; cytosol [GO:0005829]; extracellular exosome [GO:0070062]; focal adhesion [GO:0005925]; lamellipodium [GO:0030027]; perinuclear region of cytoplasm [GO:0048471]; plasma membrane [GO:0005886]; stress fiber [GO:0001725]	actin cytoskeleton organization [GO:0030036]; actin filament branching [GO:0090135]; actin filament bundle assembly [GO:0051017]; cell migration [GO:0016477]; cellular response to platelet-derived growth factor stimulus [GO:0036120]; endothelial cell chemotaxis [GO:0035767]; negative regulation of Arp2/3 complex-mediated actin nucleation [GO:0034316]; negative regulation of smooth muscle cell che…	actin filament binding [GO:0051015]; Arp2/3 complex binding [GO:0071933]; cadherin binding [GO:0045296]; identical protein binding [GO:0042802]
Q7Z406;M0QY43;A0A0C4DFM8;A1L2Z2	-1.66017	1.41827	Q7Z406	MYH14	Myosin-14 (Myosin heavy chain 14) (Myosin heavy chain, non-muscle IIc) (Non-muscle myosin heavy chain IIc) (NMHC II-C)	1995	c	actomyosin [GO:0042641]; axon [GO:0030424]; brush border [GO:0005903]; cytosol [GO:0005829]; extracellular exosome [GO:0070062]; growth cone [GO:0030426]; membrane [GO:0016020]; myelin sheath [GO:0043209]; myosin II complex [GO:0016460]; myosin II filament [GO:0097513]; stress fiber [GO:0001725]	actin filament-based movement [GO:0030048]; actomyosin structure organization [GO:0031032]; mitochondrion morphogenesis [GO:0070584]; neuronal action potential [GO:0019228]; regulation of cell shape [GO:0008360]; sensory perception of sound [GO:0007605]; skeletal muscle contraction [GO:0003009]; skeletal muscle tissue development [GO:0007519]; vocalization behavior [GO:0071625]	actin-dependent ATPase activity [GO:0030898]; actin filament binding [GO:0051015]; ATPase activity [GO:0016887]; ATP binding [GO:0005524]; calmodulin binding [GO:0005516]; microfilament motor activity [GO:0000146]
P46060;H0Y4Q3;B0QYT5;B0QYT4	1.19069	1.29939	P46060	RANGAP1	Ran GTPase-activating protein 1 (RanGAP1)	587	x	aggresome [GO:0016235]; axon cytoplasm [GO:1904115]; condensed chromosome kinetochore [GO:0000777]; cytoplasm [GO:0005737]; cytoplasmic periphery of the nuclear pore complex [GO:1990723]; cytosol [GO:0005829]; dendrite [GO:0030425]; intracellular membrane-bounded organelle [GO:0043231]; mitotic spindle [GO:0072686]; nuclear envelope [GO:0005635]; nuclear membrane [GO:0031965]; nuclear pore [GO:00…	cellular response to vasopressin [GO:1904117]; negative regulation of protein export from nucleus [GO:0046826]; protein sumoylation [GO:0016925]; response to axon injury [GO:0048678]; signal transduction [GO:0007165]; sister chromatid cohesion [GO:0007062]	cadherin binding [GO:0045296]; GTPase activator activity [GO:0005096]; Ran GTPase binding [GO:0008536]; RNA binding [GO:0003723]; ubiquitin protein ligase binding [GO:0031625]
Q9NRD5	0.0282137	0.000336823	Q9NRD5	PICK1	PRKCA-binding protein (Protein interacting with C kinase 1) (Protein kinase C-alpha-binding protein)	415	x	aggresome [GO:0016235]; cell junction [GO:0030054]; cytoplasm [GO:0005737]; cytoskeleton [GO:0005856]; cytosol [GO:0005829]; endocytic vesicle membrane [GO:0030666]; Golgi apparatus [GO:0005794]; mitochondrion [GO:0005739]; neuron projection [GO:0043005]; perinuclear region of cytoplasm [GO:0048471]; plasma membrane [GO:0005886]; postsynaptic density [GO:0014069]; postsynaptic membrane [GO:004521…	cellular response to decreased oxygen levels [GO:0036294]; cellular response to glucose starvation [GO:0042149]; dendritic spine maintenance [GO:0097062]; dendritic spine organization [GO:0097061]; DNA methylation involved in embryo development [GO:0043045]; DNA methylation involved in gamete generation [GO:0043046]; glial cell development [GO:0021782]; long term synaptic depression [GO:0060292];…	actin filament binding [GO:0051015]; Arp2/3 complex binding [GO:0071933]; ATPase activity [GO:0016887]; enzyme binding [GO:0019899]; G-protein coupled receptor binding [GO:0001664]; identical protein binding [GO:0042802]; metal ion binding [GO:0046872]; protein C-terminus binding [GO:0008022]; protein domain specific binding [GO:0019904]; protein kinase C binding [GO:0005080]; receptor binding [G…
Q9H0D6	0.799396	0.0415052	Q9H0D6	XRN2	5'-3' exoribonuclease 2 (EC 3.1.13.-) (DHM1-like protein) (DHP protein)	950	n	aggresome [GO:0016235]; membrane [GO:0016020]; nucleolus [GO:0005730]; nucleoplasm [GO:0005654]; nucleus [GO:0005634]	cell growth [GO:0016049]; DNA catabolic process, exonucleolytic [GO:0000738]; DNA-templated transcription, termination [GO:0006353]; hippocampus development [GO:0021766]; mRNA processing [GO:0006397]; neuron differentiation [GO:0030182]; regulation of transcription, DNA-templated [GO:0006355]; retina development in camera-type eye [GO:0060041]; RNA catabolic process [GO:0006401]; RNA metabolic pr…	3'-5'-exoribonuclease activity [GO:0000175]; 5'-3' exonuclease activity [GO:0008409]; 5'-3' exoribonuclease activity [GO:0004534]; metal ion binding [GO:0046872]; nuclease activity [GO:0004518]; RNA binding [GO:0003723]; transcription termination site sequence-specific DNA binding [GO:0001147]
P07814	-0.283749	0.156195	P07814	EPRS	Bifunctional glutamate/proline--tRNA ligase (Bifunctional aminoacyl-tRNA synthetase) (Cell proliferation-inducing gene 32 protein) (Glutamatyl-prolyl-tRNA synthetase) [Includes: Glutamate--tRNA ligase (EC 6.1.1.17) (Glutamyl-tRNA synthetase) (GluRS); Proline--tRNA ligase (EC 6.1.1.15) (Prolyl-tRNA synthetase)]	1512	c	aminoacyl-tRNA synthetase multienzyme complex [GO:0017101]; cytoplasm [GO:0005737]; cytosol [GO:0005829]; GAIT complex [GO:0097452]; intracellular ribonucleoprotein complex [GO:0030529]; membrane [GO:0016020]	cellular response to interferon-gamma [GO:0071346]; glutamyl-tRNA aminoacylation [GO:0006424]; negative regulation of translation [GO:0017148]; prolyl-tRNA aminoacylation [GO:0006433]; protein complex assembly [GO:0006461]; tRNA aminoacylation for protein translation [GO:0006418]	ATP binding [GO:0005524]; glutamate-tRNA ligase activity [GO:0004818]; GTPase binding [GO:0051020]; proline-tRNA ligase activity [GO:0004827]; RNA stem-loop binding [GO:0035613]
P49792;F8WBP7	0.466455	0.528176	P49792	RANBP2	E3 SUMO-protein ligase RanBP2 (EC 6.3.2.-) (358 kDa nucleoporin) (Nuclear pore complex protein Nup358) (Nucleoporin Nup358) (Ran-binding protein 2) (RanBP2) (p270)	3224	n	annulate lamellae [GO:0005642]; centrosome [GO:0005813]; cytoplasm [GO:0005737]; cytoplasmic periphery of the nuclear pore complex [GO:1990723]; cytosol [GO:0005829]; host cell [GO:0043657]; intracellular membrane-bounded organelle [GO:0043231]; membrane [GO:0016020]; mitochondrion [GO:0005739]; nuclear envelope [GO:0005635]; nuclear inclusion body [GO:0042405]; nuclear membrane [GO:0031965]; nuc…	centrosome localization [GO:0051642]; G1/S transition of mitotic cell cycle [GO:0000082]; intracellular transport of virus [GO:0075733]; mitotic nuclear envelope disassembly [GO:0007077]; mRNA export from nucleus [GO:0006406]; NLS-bearing protein import into nucleus [GO:0006607]; positive regulation of glucokinase activity [GO:0033133]; positive regulation of GTPase activity [GO:0043547]; positiv…	ligase activity [GO:0016874]; metal ion binding [GO:0046872]; peptidyl-prolyl cis-trans isomerase activity [GO:0003755]; protein complex binding [GO:0032403]; Ran GTPase binding [GO:0008536]; RNA binding [GO:0003723]; SUMO transferase activity [GO:0019789]
Q9ULV0;A0A0A0MR36;K7EPI3	0.274972	0.140674	Q9ULV0	MYO5B	Unconventional myosin-Vb	1848	x	apical cortex [GO:0045179]; cytoplasmic vesicle membrane [GO:0030659]; extracellular exosome [GO:0070062]; myosin complex [GO:0016459]; protein complex [GO:0043234]	endosome localization [GO:0032439]; protein transport [GO:0015031]; renal water homeostasis [GO:0003091]; vesicle-mediated transport [GO:0016192]	actin binding [GO:0003779]; ATP binding [GO:0005524]; calmodulin binding [GO:0005516]; microfilament motor activity [GO:0000146]; Rab GTPase binding [GO:0017137]
Q14980	-0.455036	0.221282	Q14980	NUMA1	Nuclear mitotic apparatus protein 1 (Nuclear matrix protein-22) (NMP-22) (Nuclear mitotic apparatus protein) (NuMA protein) (SP-H antigen)	2115	x	apical part of cell [GO:0045177]; cell cortex [GO:0005938]; cell cortex region [GO:0099738]; centrosome [GO:0005813]; chromosome [GO:0005694]; cortical microtubule [GO:0055028]; cytoplasmic microtubule bundle [GO:1905720]; cytosol [GO:0005829]; dendrite [GO:0030425]; extracellular exosome [GO:0070062]; extrinsic component of plasma membrane [GO:0019897]; Golgi membrane [GO:0000139]; microtubule b…	anastral spindle assembly [GO:0055048]; astral microtubule organization [GO:0030953]; cell division [GO:0051301]; chromosome segregation [GO:0007059]; establishment of mitotic spindle orientation [GO:0000132]; lung epithelial cell differentiation [GO:0060487]; meiotic cell cycle [GO:0051321]; microtubule bundle formation [GO:0001578]; nucleus organization [GO:0006997]; positive regulation of BMP …	disordered domain specific binding [GO:0097718]; dynein complex binding [GO:0070840]; microtubule binding [GO:0008017]; microtubule minus-end binding [GO:0051011]; microtubule plus-end binding [GO:0051010]; phosphatidylinositol binding [GO:0035091]; protein C-terminus binding [GO:0008022]; structural molecule activity [GO:0005198]; tubulin binding [GO:0015631]
Q13895;H7BY94	-0.44056	0.154668	Q13895	BYSL	Bystin	437	x	apical part of cell [GO:0045177]; cytoplasm [GO:0005737]; cytosol [GO:0005829]; intracellular membrane-bounded organelle [GO:0043231]; membrane [GO:0016020]; nucleolus [GO:0005730]; nucleoplasm [GO:0005654]; nucleus [GO:0005634]	cell adhesion [GO:0007155]; cell proliferation [GO:0008283]; female pregnancy [GO:0007565]; maturation of SSU-rRNA from tricistronic rRNA transcript (SSU-rRNA, 5.8S rRNA, LSU-rRNA) [GO:0000462]; rRNA processing [GO:0006364]; trophectodermal cell differentiation [GO:0001829]	RNA binding [GO:0003723]
P02787;C9JVG0	1.8729	0.237035	P02787	TF	Serotransferrin (Transferrin) (Beta-1 metal-binding globulin) (Siderophilin)	698	pm	apical plasma membrane [GO:0016324]; basal part of cell [GO:0045178]; basal plasma membrane [GO:0009925]; blood microparticle [GO:0072562]; cell surface [GO:0009986]; clathrin-coated pit [GO:0005905]; clathrin-coated vesicle membrane [GO:0030665]; cytoplasmic vesicle [GO:0031410]; early endosome [GO:0005769]; endocytic vesicle [GO:0030139]; endoplasmic reticulum lumen [GO:0005788]; endosome membr…	cellular iron ion homeostasis [GO:0006879]; cellular protein metabolic process [GO:0044267]; cellular response to iron ion [GO:0071281]; ferrous iron import across plasma membrane [GO:0098707]; iron ion homeostasis [GO:0055072]; membrane organization [GO:0061024]; platelet degranulation [GO:0002576]; positive regulation of receptor-mediated endocytosis [GO:0048260]; post-translational protein mod…	ferric iron binding [GO:0008199]; ferric iron transmembrane transporter activity [GO:0015091]; ferrous iron binding [GO:0008198]; transferrin receptor binding [GO:1990459]
P11166	-0.188611	0.0161984	P11166	SLC2A1	Solute carrier family 2, facilitated glucose transporter member 1 (Glucose transporter type 1, erythrocyte/brain) (GLUT-1) (HepG2 glucose transporter)	492	x	apical plasma membrane [GO:0016324]; basolateral plasma membrane [GO:0016323]; blood microparticle [GO:0072562]; caveola [GO:0005901]; cortical actin cytoskeleton [GO:0030864]; cytosol [GO:0005829]; extracellular exosome [GO:0070062]; female pronucleus [GO:0001939]; Golgi membrane [GO:0000139]; integral component of plasma membrane [GO:0005887]; intercalated disc [GO:0014704]; melanosome [GO:0042…	cellular hyperosmotic response [GO:0071474]; cellular response to glucose starvation [GO:0042149]; cellular response to mechanical stimulus [GO:0071260]; cerebral cortex development [GO:0021987]; female pregnancy [GO:0007565]; glucose transmembrane transport [GO:1904659]; glucose transport [GO:0015758]; lactose biosynthetic process [GO:0005989]; L-ascorbic acid metabolic process [GO:0019852]; pro…	dehydroascorbic acid transporter activity [GO:0033300]; D-glucose transmembrane transporter activity [GO:0055056]; glucose transmembrane transporter activity [GO:0005355]; identical protein binding [GO:0042802]; kinase binding [GO:0019900]; protein self-association [GO:0043621]; xenobiotic transporter activity [GO:0042910]
O15020;A4QPE4	0.628452	0.757014	O15020	SPTBN2	Spectrin beta chain, non-erythrocytic 2 (Beta-III spectrin) (Spinocerebellar ataxia 5 protein)	2390	x	apical plasma membrane [GO:0016324]; cell junction [GO:0030054]; cytosol [GO:0005829]; extracellular space [GO:0005615]; neuronal cell body [GO:0043025]; spectrin [GO:0008091]	actin filament capping [GO:0051693]; adult behavior [GO:0030534]; antigen processing and presentation of exogenous peptide antigen via MHC class II [GO:0019886]; axon guidance [GO:0007411]; cerebellar Purkinje cell layer morphogenesis [GO:0021692]; ER to Golgi vesicle-mediated transport [GO:0006888]; MAPK cascade [GO:0000165]; multicellular organism growth [GO:0035264]; synapse assembly [GO:00074…	actin binding [GO:0003779]; cadherin binding [GO:0045296]; phospholipid binding [GO:0005543]; Ras guanyl-nucleotide exchange factor activity [GO:0005088]; structural constituent of cytoskeleton [GO:0005200]
P58107	0.499281	0.283684	P58107	EPPK1	Epiplakin (450 kDa epidermal antigen)	5090	pm	apicolateral plasma membrane [GO:0016327]; basolateral plasma membrane [GO:0016323]; bicellular tight junction [GO:0005923]; cell periphery [GO:0071944]; cell projection [GO:0042995]; cytoplasm [GO:0005737]; cytoskeleton [GO:0005856]; hemidesmosome [GO:0030056]; keratin filament [GO:0045095]; perinucleolar compartment [GO:0097356]	intermediate filament organization [GO:0045109]; negative regulation of cell migration [GO:0030336]; negative regulation of epithelial cell proliferation [GO:0050680]; negative regulation of keratinocyte migration [GO:0051548]; negative regulation of keratinocyte proliferation [GO:0010839]; negative regulation of wound healing [GO:0061045]; regulation of epithelium regeneration [GO:1905041]; woun…	cytoskeletal protein binding [GO:0008092]; intermediate filament binding [GO:0019215]; RNA binding [GO:0003723]
Q8NEJ9;H0YJ17;G3V4G1	-1.02662	0.697537	Q8NEJ9	NGDN	Neuroguidin (Centromere accumulated nuclear protein 1) (CANu1) (EIF4E-binding protein)	315	x	axon [GO:0030424]; chromosome, centromeric region [GO:0000775]; dendrite [GO:0030425]; filopodium [GO:0030175]; mitochondrion [GO:0005739]; nucleolus [GO:0005730]; nucleus [GO:0005634]; small-subunit processome [GO:0032040]	maturation of SSU-rRNA from tricistronic rRNA transcript (SSU-rRNA, 5.8S rRNA, LSU-rRNA) [GO:0000462]; regulation of translation [GO:0006417]	RNA binding [GO:0003723]
P04792;F8WE04;C9J3N8	-0.239401	0.145032	P04792	HSPB1	Heat shock protein beta-1 (HspB1) (28 kDa heat shock protein) (Estrogen-regulated 24 kDa protein) (Heat shock 27 kDa protein) (HSP 27) (Stress-responsive protein 27) (SRP27)	205	x	axon cytoplasm [GO:1904115]; cytoplasm [GO:0005737]; cytoskeleton [GO:0005856]; cytosol [GO:0005829]; extracellular exosome [GO:0070062]; extracellular matrix [GO:0031012]; extracellular space [GO:0005615]; focal adhesion [GO:0005925]; nucleus [GO:0005634]; plasma membrane [GO:0005886]; proteasome complex [GO:0000502]; spindle [GO:0005819]; Z disc [GO:0030018]	anterograde axonal protein transport [GO:0099641]; cellular response to vascular endothelial growth factor stimulus [GO:0035924]; chaperone-mediated protein folding [GO:0061077]; intracellular signal transduction [GO:0035556]; movement of cell or subcellular component [GO:0006928]; negative regulation of apoptotic process [GO:0043066]; negative regulation of oxidative stress-induced intrinsic apo…	identical protein binding [GO:0042802]; protein binding involved in protein folding [GO:0044183]; protein homodimerization activity [GO:0042803]; protein kinase binding [GO:0019901]; protein kinase C binding [GO:0005080]; protein kinase C inhibitor activity [GO:0008426]; RNA binding [GO:0003723]; ubiquitin binding [GO:0043130]
O43390;B4DT28	-0.239862	0.143709	O43390	HNRNPR	Heterogeneous nuclear ribonucleoprotein R (hnRNP R)	633	x	axon terminus [GO:0043679]; catalytic step 2 spliceosome [GO:0071013]; dendrite [GO:0030425]; endoplasmic reticulum [GO:0005783]; growth cone [GO:0030426]; intracellular ribonucleoprotein complex [GO:0030529]; nucleoplasm [GO:0005654]; spliceosomal complex [GO:0005681]	circadian rhythm [GO:0007623]; mRNA destabilization [GO:0061157]; mRNA processing [GO:0006397]; mRNA splicing, via spliceosome [GO:0000398]; negative regulation of catalytic activity [GO:0043086]; positive regulation of mRNA catabolic process [GO:0061014]; RNA metabolic process [GO:0016070]	mRNA 3'-UTR binding [GO:0003730]; RNA binding [GO:0003723]
P68371;P04350;Q3ZCM7;K7ESM5;Q9BUF5;M0R2D3;M0QY85;M0QZL7;M0R278;M0R0X0;M0QY37;M0QX14;M0QYM7;M0R042;M0R2T4;A0A075B724	0.396769	0.346688	P68371	TUBB4B	Tubulin beta-4B chain (Tubulin beta-2 chain) (Tubulin beta-2C chain)	445	x	azurophil granule lumen [GO:0035578]; cytoskeleton [GO:0005856]; cytosol [GO:0005829]; extracellular exosome [GO:0070062]; extracellular matrix [GO:0031012]; extracellular region [GO:0005576]; extracellular vesicle [GO:1903561]; microtubule [GO:0005874]; microtubule cytoskeleton [GO:0015630]; myelin sheath [GO:0043209]; nucleus [GO:0005634]	ciliary basal body docking [GO:0097711]; G2/M transition of mitotic cell cycle [GO:0000086]; microtubule-based process [GO:0007017]; movement of cell or subcellular component [GO:0006928]; natural killer cell mediated cytotoxicity [GO:0042267]; neutrophil degranulation [GO:0043312]	double-stranded RNA binding [GO:0003725]; GTPase activity [GO:0003924]; GTP binding [GO:0005525]; MHC class I protein binding [GO:0042288]; structural constituent of cytoskeleton [GO:0005200]; unfolded protein binding [GO:0051082]
O75367;B4DJC3;D6RCF2;Q9P0M6;Q5SQT3	0.2358	0.116469	O75367	H2AFY	Core histone macro-H2A.1 (Histone macroH2A1) (mH2A1) (Histone H2A.y) (H2A/y) (Medulloblastoma antigen MU-MB-50.205)	372	n	Barr body [GO:0001740]; condensed chromosome [GO:0000793]; extracellular exosome [GO:0070062]; nuclear chromatin [GO:0000790]; nuclear chromosome [GO:0000228]; nuclear chromosome, telomeric region [GO:0000784]; nucleolus [GO:0005730]; nucleosome [GO:0000786]; nucleus [GO:0005634]; pericentric heterochromatin [GO:0005721]; sex chromatin [GO:0001739]	chromatin silencing [GO:0006342]; covalent chromatin modification [GO:0016569]; dosage compensation [GO:0007549]; establishment of protein localization to chromatin [GO:0071169]; negative regulation of cell cycle G2/M phase transition [GO:1902750]; negative regulation of gene expression, epigenetic [GO:0045814]; negative regulation of histone H3-K27 methylation [GO:0061086]; negative regulation o…	chromatin DNA binding [GO:0031490]; core promoter sequence-specific DNA binding [GO:0001046]; DNA binding [GO:0003677]; double-stranded methylated DNA binding [GO:0010385]; enzyme binding [GO:0019899]; nucleosomal DNA binding [GO:0031492]; protein heterodimerization activity [GO:0046982]; protein kinase binding [GO:0019901]; protein serine/threonine kinase inhibitor activity [GO:0030291]; rDNA bi…
Q9UQE7	1.56825	1.29939	Q9UQE7	SMC3	Structural maintenance of chromosomes protein 3 (SMC protein 3) (SMC-3) (Basement membrane-associated chondroitin proteoglycan) (Bamacan) (Chondroitin sulfate proteoglycan 6) (Chromosome-associated polypeptide) (hCAP)	1217	x	basement membrane [GO:0005604]; chromatin [GO:0000785]; chromosome [GO:0005694]; chromosome, centromeric region [GO:0000775]; cohesin complex [GO:0008278]; cytoplasm [GO:0005737]; cytosol [GO:0005829]; intracellular [GO:0005622]; lateral element [GO:0000800]; meiotic cohesin complex [GO:0030893]; nuclear matrix [GO:0016363]; nuclear meiotic cohesin complex [GO:0034991]; nucleoplasm [GO:0005654]; …	cell division [GO:0051301]; DNA repair [GO:0006281]; interaction with symbiont [GO:0051702]; meiotic cell cycle [GO:0051321]; mitotic cell cycle [GO:0000278]; mitotic sister chromatid cohesion [GO:0007064]; negative regulation of DNA endoreduplication [GO:0032876]; positive regulation by host of viral release from host cell [GO:0044791]; regulation of DNA replication [GO:0006275]; sister chromati…	ATP binding [GO:0005524]; chromatin binding [GO:0003682]; dynein complex binding [GO:0070840]; mediator complex binding [GO:0036033]; microtubule motor activity [GO:0003777]; protein heterodimerization activity [GO:0046982]
P15924	3.08817	0.55372	P15924	DSP	Desmoplakin (DP) (250/210 kDa paraneoplastic pemphigus antigen)	2871	x	basolateral plasma membrane [GO:0016323]; cornified envelope [GO:0001533]; desmosome [GO:0030057]; extracellular exosome [GO:0070062]; extracellular matrix [GO:0031012]; fascia adherens [GO:0005916]; ficolin-1-rich granule membrane [GO:0101003]; intercalated disc [GO:0014704]; intermediate filament [GO:0005882]; nucleus [GO:0005634]; plasma membrane [GO:0005886]	adherens junction organization [GO:0034332]; bundle of His cell-Purkinje myocyte adhesion involved in cell communication [GO:0086073]; cornification [GO:0070268]; desmosome organization [GO:0002934]; epidermis development [GO:0008544]; intermediate filament organization [GO:0045109]; keratinization [GO:0031424]; keratinocyte differentiation [GO:0030216]; neutrophil degranulation [GO:0043312]; pep…	cell adhesion molecule binding [GO:0050839]; cell adhesive protein binding involved in bundle of His cell-Purkinje myocyte communication [GO:0086083]; protein binding, bridging [GO:0030674]; protein kinase C binding [GO:0005080]; RNA binding [GO:0003723]; scaffold protein binding [GO:0097110]; structural constituent of cytoskeleton [GO:0005200]; structural molecule activity [GO:0005198]
A0A087X0K9;G5E9E7;G3V1L9;Q07157;H0YKB1;H0YLT6;H0Y3R8	-0.648671	0.66003	A0A087X0K9	TJP1	Tight junction protein ZO-1	1676	pm	bicellular tight junction [GO:0005923]; cell junction [GO:0030054]; cytosol [GO:0005829]; plasma membrane [GO:0005886]
Q8WVV4	0.305668	0.072917	Q8WVV4	POF1B	Protein POF1B (Premature ovarian failure protein 1B)	589	x	bicellular tight junction [GO:0005923]; desmosome [GO:0030057]		actin binding [GO:0003779]
P17066;P48741	0.00338542	0.000336823	P17066	HSPA6	Heat shock 70 kDa protein 6 (Heat shock 70 kDa protein B')	643	c	blood microparticle [GO:0072562]; centriole [GO:0005814]; cytoplasm [GO:0005737]; cytosol [GO:0005829]; extracellular exosome [GO:0070062]; extracellular region [GO:0005576]; ficolin-1-rich granule lumen [GO:1904813]; secretory granule lumen [GO:0034774]	cellular response to heat [GO:0034605]; neutrophil degranulation [GO:0043312]; protein refolding [GO:0042026]; response to unfolded protein [GO:0006986]	ATPase activity, coupled [GO:0042623]; ATP binding [GO:0005524]; enzyme binding [GO:0019899]; heat shock protein binding [GO:0031072]; unfolded protein binding [GO:0051082]
P11142;E9PKE3;E9PN89;E9PNE6;A8K7Q2;P54652;E9PLF4;E9PQQ4;E9PQK7;E9PK54;E9PPY6;E9PI65;E9PS65;E9PN25;E9PM13	0.15139	0.0958869	P11142	HSPA8	Heat shock cognate 71 kDa protein (Heat shock 70 kDa protein 8) (Lipopolysaccharide-associated protein 1) (LAP-1) (LPS-associated protein 1)	646	c	blood microparticle [GO:0072562]; clathrin-sculpted gamma-aminobutyric acid transport vesicle membrane [GO:0061202]; cytosol [GO:0005829]; extracellular exosome [GO:0070062]; extracellular matrix [GO:0031012]; extracellular region [GO:0005576]; extracellular space [GO:0005615]; ficolin-1-rich granule lumen [GO:1904813]; focal adhesion [GO:0005925]; intracellular [GO:0005622]; intracellular ribonu…	ATP metabolic process [GO:0046034]; cellular response to starvation [GO:0009267]; chaperone-mediated autophagy [GO:0061684]; chaperone-mediated autophagy translocation complex disassembly [GO:1904764]; chaperone mediated protein folding requiring cofactor [GO:0051085]; chaperone-mediated protein transport involved in chaperone-mediated autophagy [GO:0061741]; clathrin coat disassembly [GO:0072318…	ATPase activity [GO:0016887]; ATPase activity, coupled [GO:0042623]; ATP binding [GO:0005524]; C3HC4-type RING finger domain binding [GO:0055131]; cadherin binding [GO:0045296]; enzyme binding [GO:0019899]; G-protein coupled receptor binding [GO:0001664]; heat shock protein binding [GO:0031072]; MHC class II protein complex binding [GO:0023026]; phosphatidylserine binding [GO:0001786]; RNA bindin…
P63261;P60709;I3L3I0;I3L1U9;I3L4N8;G5E9R0;K7EM38;E7EVS6;I3L3R2;J3KT65;C9JUM1;C9JZR7;Q6S8J3;C9JTX5;A5A3E0;P0CG38;F8WCH0;Q9BYX7;P0CG39	0.689392	0.773112	P63261	ACTG1	Actin, cytoplasmic 2 (Gamma-actin) [Cleaved into: Actin, cytoplasmic 2, N-terminally processed]	375	pm	blood microparticle [GO:0072562]; cytoskeleton [GO:0005856]; cytosol [GO:0005829]; dense body [GO:0097433]; extracellular exosome [GO:0070062]; extracellular matrix [GO:0031012]; extracellular space [GO:0005615]; filamentous actin [GO:0031941]; focal adhesion [GO:0005925]; membrane [GO:0016020]; myelin sheath [GO:0043209]; myofibril [GO:0030016]; nucleus [GO:0005634]; plasma membrane [GO:0005886]	cell junction assembly [GO:0034329]; ephrin receptor signaling pathway [GO:0048013]; Fc-gamma receptor signaling pathway involved in phagocytosis [GO:0038096]; membrane organization [GO:0061024]; movement of cell or subcellular component [GO:0006928]; platelet aggregation [GO:0070527]; response to calcium ion [GO:0051592]; response to mechanical stimulus [GO:0009612]; retina homeostasis [GO:00018…	ATP binding [GO:0005524]; identical protein binding [GO:0042802]; structural constituent of cytoskeleton [GO:0005200]; ubiquitin protein ligase binding [GO:0031625]
Q08380;K7EQT9;K7ES75;K7EN99;K7ERZ6;K7EJD3;K7ESM3;K7EKQ5;K7EP36	-1.73507	1.10308	Q08380	LGALS3BP	Galectin-3-binding protein (Basement membrane autoantigen p105) (Lectin galactoside-binding soluble 3-binding protein) (Mac-2-binding protein) (MAC2BP) (Mac-2 BP) (Tumor-associated antigen 90K)	585	pm	blood microparticle [GO:0072562]; extracellular exosome [GO:0070062]; extracellular region [GO:0005576]; extracellular space [GO:0005615]; membrane [GO:0016020]; platelet dense granule lumen [GO:0031089]; proteinaceous extracellular matrix [GO:0005578]	cell adhesion [GO:0007155]; cellular defense response [GO:0006968]; platelet degranulation [GO:0002576]; signal transduction [GO:0007165]	scavenger receptor activity [GO:0005044]
P22087;M0QXL5;M0R299;M0R2Q4;M0R0P1;M0R2U2;M0R1H0;M0R2B0;M0QXC9	-0.102178	0.0410456	P22087	FBL	rRNA 2'-O-methyltransferase fibrillarin (EC 2.1.1.-) (34 kDa nucleolar scleroderma antigen) (Histone-glutamine methyltransferase)	321	n	box C/D snoRNP complex [GO:0031428]; Cajal body [GO:0015030]; chromosome [GO:0005694]; dense fibrillar component [GO:0001651]; extracellular exosome [GO:0070062]; fibrillar center [GO:0001650]; granular component [GO:0001652]; membrane [GO:0016020]; nucleolus [GO:0005730]; nucleoplasm [GO:0005654]; nucleus [GO:0005634]; small-subunit processome [GO:0032040]	box C/D snoRNA 3'-end processing [GO:0000494]; histone glutamine methylation [GO:1990258]; osteoblast differentiation [GO:0001649]; rRNA methylation [GO:0031167]; rRNA processing [GO:0006364]; snoRNA localization [GO:0048254]; tRNA processing [GO:0008033]	ATPase binding [GO:0051117]; histone-glutamine methyltransferase activity [GO:1990259]; RNA binding [GO:0003723]; rRNA methyltransferase activity [GO:0008649]; TFIID-class transcription factor binding [GO:0001094]
Q9Y2X3;H7BZ72;F8WED0	-0.960864	0.792654	Q9Y2X3	NOP58	Nucleolar protein 58 (Nucleolar protein 5)	529	n	box C/D snoRNP complex [GO:0031428]; Cajal body [GO:0015030]; cytosol [GO:0005829]; fibrillar center [GO:0001650]; membrane [GO:0016020]; nucleolus [GO:0005730]; nucleoplasm [GO:0005654]; nucleus [GO:0005634]; pre-snoRNP complex [GO:0070761]; small nucleolar ribonucleoprotein complex [GO:0005732]; small-subunit processome [GO:0032040]	cell growth [GO:0016049]; rRNA modification [GO:0000154]; rRNA processing [GO:0006364]; snoRNA localization [GO:0048254]	ATPase binding [GO:0051117]; RNA binding [GO:0003723]; snoRNA binding [GO:0030515]; TFIID-class transcription factor binding [GO:0001094]
A6NHQ2	0.0234977	0.00182298	A6NHQ2	FBLL1	rRNA/tRNA 2'-O-methyltransferase fibrillarin-like protein 1 (EC 2.1.1.-) (Protein-glutamine methyltransferase)	334	n	box C/D snoRNP complex [GO:0031428]; Cajal body [GO:0015030]; fibrillar center [GO:0001650]; nucleus [GO:0005634]; small-subunit processome [GO:0032040]	box C/D snoRNA 3'-end processing [GO:0000494]; histone glutamine methylation [GO:1990258]; rRNA methylation [GO:0031167]; tRNA processing [GO:0008033]	histone-glutamine methyltransferase activity [GO:1990259]; RNA binding [GO:0003723]; rRNA methyltransferase activity [GO:0008649]
O00567;H0YDU4;H0Y653;Q5JXT2	-0.977878	0.766292	O00567	NOP56	Nucleolar protein 56 (Nucleolar protein 5A)	594	n	box C/D snoRNP complex [GO:0031428]; cytoplasm [GO:0005737]; fibrillar center [GO:0001650]; membrane [GO:0016020]; nucleolus [GO:0005730]; nucleoplasm [GO:0005654]; pre-snoRNP complex [GO:0070761]; small nucleolar ribonucleoprotein complex [GO:0005732]; small-subunit processome [GO:0032040]	rRNA modification [GO:0000154]; rRNA processing [GO:0006364]	cadherin binding [GO:0045296]; histone methyltransferase binding [GO:1990226]; RNA binding [GO:0003723]; snoRNA binding [GO:0030515]
O43818	2.45774	1.50128	O43818	RRP9	U3 small nucleolar RNA-interacting protein 2 (RRP9 homolog) (U3 small nucleolar ribonucleoprotein-associated 55 kDa protein) (U3 snoRNP-associated 55 kDa protein) (U3-55K)	475	n	box C/D snoRNP complex [GO:0031428]; nucleolus [GO:0005730]; nucleoplasm [GO:0005654]; small-subunit processome [GO:0032040]	rRNA processing [GO:0006364]	RNA binding [GO:0003723]
O60832;C9IYT0;H7C0M1;H7C2Q9;H7C2Q2;H7BZF2	-0.89758	0.770374	O60832	DKC1	H/ACA ribonucleoprotein complex subunit 4 (EC 5.4.99.-) (CBF5 homolog) (Dyskerin) (Nopp140-associated protein of 57 kDa) (Nucleolar protein NAP57) (Nucleolar protein family A member 4) (snoRNP protein DKC1)	514	n	box H/ACA scaRNP complex [GO:0072589]; box H/ACA snoRNP complex [GO:0031429]; box H/ACA telomerase RNP complex [GO:0090661]; cytoplasm [GO:0005737]; fibrillar center [GO:0001650]; nucleolus [GO:0005730]; nucleoplasm [GO:0005654]; nucleus [GO:0005634]; telomerase holoenzyme complex [GO:0005697]	box H/ACA snoRNA 3'-end processing [GO:0000495]; cell proliferation [GO:0008283]; mRNA pseudouridine synthesis [GO:1990481]; positive regulation of establishment of protein localization to telomere [GO:1904851]; positive regulation of telomerase activity [GO:0051973]; positive regulation of telomerase RNA localization to Cajal body [GO:1904874]; positive regulation of telomere maintenance via tel…	box H/ACA snoRNA binding [GO:0034513]; pseudouridine synthase activity [GO:0009982]; RNA binding [GO:0003723]; telomerase activity [GO:0003720]; telomerase RNA binding [GO:0070034]
Q9NY12	-0.0950741	0.0352173	Q9NY12	GAR1	H/ACA ribonucleoprotein complex subunit 1 (Nucleolar protein family A member 1) (snoRNP protein GAR1)	217	n	box H/ACA scaRNP complex [GO:0072589]; box H/ACA snoRNP complex [GO:0031429]; box H/ACA telomerase RNP complex [GO:0090661]; fibrillar center [GO:0001650]; nuclear chromosome, telomeric region [GO:0000784]; nucleoplasm [GO:0005654]; nucleus [GO:0005634]; telomerase holoenzyme complex [GO:0005697]	rRNA pseudouridine synthesis [GO:0031118]; snoRNA guided rRNA pseudouridine synthesis [GO:0000454]; telomere maintenance via telomerase [GO:0007004]	box H/ACA snoRNA binding [GO:0034513]; RNA binding [GO:0003723]; telomerase RNA binding [GO:0070034]
Q15149;H0YDN1;E9PIA2;E9PQ28;REV__A0A0U1RR03	0.264529	0.10458	Q15149	PLEC	Plectin (PCN) (PLTN) (Hemidesmosomal protein 1) (HD1) (Plectin-1)	4684	x	brush border [GO:0005903]; costamere [GO:0043034]; cytosol [GO:0005829]; extracellular exosome [GO:0070062]; extracellular matrix [GO:0031012]; focal adhesion [GO:0005925]; hemidesmosome [GO:0030056]; intermediate filament cytoskeleton [GO:0045111]; plasma membrane [GO:0005886]; sarcolemma [GO:0042383]; sarcoplasm [GO:0016528]	hemidesmosome assembly [GO:0031581]	actin binding [GO:0003779]; ankyrin binding [GO:0030506]; cadherin binding [GO:0045296]; RNA binding [GO:0003723]; structural constituent of muscle [GO:0008307]
P22626;A0A087WUI2	0.286416	0.23582	P22626	HNRNPA2B1	Heterogeneous nuclear ribonucleoproteins A2/B1 (hnRNP A2/B1)	353	n	Cajal body [GO:0015030]; catalytic step 2 spliceosome [GO:0071013]; chromosome, telomeric region [GO:0000781]; cytoplasm [GO:0005737]; extracellular exosome [GO:0070062]; intracellular ribonucleoprotein complex [GO:0030529]; membrane [GO:0016020]; nuclear matrix [GO:0016363]; nucleoplasm [GO:0005654]; nucleus [GO:0005634]; spliceosomal complex [GO:0005681]	G-quadruplex DNA unwinding [GO:0044806]; miRNA transport [GO:1990428]; mRNA export from nucleus [GO:0006406]; mRNA processing [GO:0006397]; mRNA splicing, via spliceosome [GO:0000398]; negative regulation of mRNA splicing, via spliceosome [GO:0048025]; negative regulation of transcription from RNA polymerase II promoter [GO:0000122]; positive regulation of telomerase RNA reverse transcriptase act…	G-rich strand telomeric DNA binding [GO:0098505]; miRNA binding [GO:0035198]; mRNA 3'-UTR binding [GO:0003730]; N6-methyladenosine-containing RNA binding [GO:1990247]; pre-mRNA intronic binding [GO:0097157]; RNA binding [GO:0003723]; single-stranded telomeric DNA binding [GO:0043047]
Q9UQ35;I3L1C0;A0A087X1W1;I3L1I8;I3L182;I3L4D8	-1.53105	1.41827	Q9UQ35	SRRM2	Serine/arginine repetitive matrix protein 2 (300 kDa nuclear matrix antigen) (Serine/arginine-rich splicing factor-related nuclear matrix protein of 300 kDa) (SR-related nuclear matrix protein of 300 kDa) (Ser/Arg-related nuclear matrix protein of 300 kDa) (Splicing coactivator subunit SRm300) (Tax-responsive enhancer element-binding protein 803) (TaxREB803)	2752	n	Cajal body [GO:0015030]; catalytic step 2 spliceosome [GO:0071013]; nuclear speck [GO:0016607]; nucleoplasm [GO:0005654]	mRNA splicing, via spliceosome [GO:0000398]	C2H2 zinc finger domain binding [GO:0070742]; protein N-terminus binding [GO:0047485]; RNA binding [GO:0003723]
O75940	-0.0739365	0.0256959	O75940	SMNDC1	Survival of motor neuron-related-splicing factor 30 (30 kDa splicing factor SMNrp) (SMN-related protein) (Survival motor neuron domain-containing protein 1)	238	n	Cajal body [GO:0015030]; cytoplasm [GO:0005737]; nuclear speck [GO:0016607]; nucleoplasm [GO:0005654]; nucleus [GO:0005634]; spliceosomal complex [GO:0005681]	apoptotic process [GO:0006915]; mRNA splicing, via spliceosome [GO:0000398]; RNA splicing, via transesterification reactions [GO:0000375]	RNA binding [GO:0003723]
O43172	-0.965025	0.794153	O43172	PRPF4	U4/U6 small nuclear ribonucleoprotein Prp4 (PRP4 homolog) (hPrp4) (U4/U6 snRNP 60 kDa protein) (WD splicing factor Prp4)	522	n	Cajal body [GO:0015030]; nuclear speck [GO:0016607]; nucleoplasm [GO:0005654]; nucleus [GO:0005634]; spliceosomal complex [GO:0005681]; spliceosomal snRNP complex [GO:0097525]; U4/U6 snRNP [GO:0071001]; U4/U6 x U5 tri-snRNP complex [GO:0046540]	mRNA splicing, via spliceosome [GO:0000398]; RNA processing [GO:0006396]; RNA splicing [GO:0008380]; RNA splicing, via transesterification reactions [GO:0000375]	U4 snRNA binding [GO:0030621]; U6 snRNA binding [GO:0017070]
P61978;Q5T6W2;S4R359;S4R457	0.102267	0.0608128	P61978	HNRNPK	Heterogeneous nuclear ribonucleoprotein K (hnRNP K) (Transformation up-regulated nuclear protein) (TUNP)	463	n	catalytic step 2 spliceosome [GO:0071013]; cell projection [GO:0042995]; cytoplasm [GO:0005737]; extracellular exosome [GO:0070062]; extracellular matrix [GO:0031012]; focal adhesion [GO:0005925]; membrane [GO:0016020]; nuclear chromatin [GO:0000790]; nucleoplasm [GO:0005654]; nucleus [GO:0005634]; podosome [GO:0002102]	mRNA splicing, via spliceosome [GO:0000398]; negative regulation of apoptotic process [GO:0043066]; negative regulation of mRNA splicing, via spliceosome [GO:0048025]; positive regulation of low-density lipoprotein particle receptor biosynthetic process [GO:0045716]; positive regulation of receptor-mediated endocytosis [GO:0048260]; positive regulation of transcription from RNA polymerase II prom…	cadherin binding [GO:0045296]; identical protein binding [GO:0042802]; protein domain specific binding [GO:0019904]; RNA binding [GO:0003723]; RNA polymerase II core promoter proximal region sequence-specific DNA binding [GO:0000978]; single-stranded DNA binding [GO:0003697]; transcriptional activator activity, RNA polymerase II core promoter proximal region sequence-specific binding [GO:0001077]
O60506;B7Z645;F6UXX1	-0.450022	0.412273	O60506	SYNCRIP	Heterogeneous nuclear ribonucleoprotein Q (hnRNP Q) (Glycine- and tyrosine-rich RNA-binding protein) (GRY-RBP) (NS1-associated protein 1) (Synaptotagmin-binding, cytoplasmic RNA-interacting protein)	623	n	catalytic step 2 spliceosome [GO:0071013]; CRD-mediated mRNA stability complex [GO:0070937]; endoplasmic reticulum [GO:0005783]; GAIT complex [GO:0097452]; histone pre-mRNA 3'end processing complex [GO:0071204]; intracellular ribonucleoprotein complex [GO:0030529]; membrane [GO:0016020]; nucleoplasm [GO:0005654]; nucleus [GO:0005634]	cellular response to interferon-gamma [GO:0071346]; CRD-mediated mRNA stabilization [GO:0070934]; mRNA splicing, via spliceosome [GO:0000398]; negative regulation of translation [GO:0017148]; osteoblast differentiation [GO:0001649]; RNA processing [GO:0006396]; RNA splicing [GO:0008380]; viral process [GO:0016032]	poly(A) binding [GO:0008143]; RNA binding [GO:0003723]
P38919;I3L3H2	0.0373888	0.00539765	P38919	EIF4A3	Eukaryotic initiation factor 4A-III (eIF-4A-III) (eIF4A-III) (EC 3.6.4.13) (ATP-dependent RNA helicase DDX48) (ATP-dependent RNA helicase eIF4A-3) (DEAD box protein 48) (Eukaryotic initiation factor 4A-like NUK-34) (Eukaryotic translation initiation factor 4A isoform 3) (Nuclear matrix protein 265) (NMP 265) (hNMP 265) [Cleaved into: Eukaryotic initiation factor 4A-III, N-terminally processed]	411	n	catalytic step 2 spliceosome [GO:0071013]; cytoplasm [GO:0005737]; cytosol [GO:0005829]; dendrite [GO:0030425]; exon-exon junction complex [GO:0035145]; membrane [GO:0016020]; neuronal cell body [GO:0043025]; nuclear speck [GO:0016607]; nucleolus [GO:0005730]; nucleoplasm [GO:0005654]	associative learning [GO:0008306]; cellular response to brain-derived neurotrophic factor stimulus [GO:1990416]; cellular response to selenite ion [GO:0072715]; embryonic cranial skeleton morphogenesis [GO:0048701]; exploration behavior [GO:0035640]; mRNA 3'-end processing [GO:0031124]; mRNA export from nucleus [GO:0006406]; mRNA splicing, via spliceosome [GO:0000398]; negative regulation of exci…	ATP binding [GO:0005524]; ATP-dependent RNA helicase activity [GO:0004004]; mRNA binding [GO:0003729]; poly(A) binding [GO:0008143]; ribonucleoprotein complex binding [GO:0043021]; RNA binding [GO:0003723]; RNA stem-loop binding [GO:0035613]; selenocysteine insertion sequence binding [GO:0035368]
Q9Y5S9;A0A0J9YW13	0.474378	0.367917	Q9Y5S9	RBM8A	RNA-binding protein 8A (Binder of OVCA1-1) (BOV-1) (RNA-binding motif protein 8A) (RNA-binding protein Y14) (Ribonucleoprotein RBM8A)	174	n	catalytic step 2 spliceosome [GO:0071013]; cytoplasm [GO:0005737]; cytosol [GO:0005829]; dendrite [GO:0030425]; exon-exon junction complex [GO:0035145]; neuronal cell body [GO:0043025]; nuclear speck [GO:0016607]; nucleoplasm [GO:0005654]; nucleus [GO:0005634]	mRNA 3'-end processing [GO:0031124]; mRNA export from nucleus [GO:0006406]; mRNA splicing, via spliceosome [GO:0000398]; nuclear-transcribed mRNA catabolic process, nonsense-mediated decay [GO:0000184]; regulation of alternative mRNA splicing, via spliceosome [GO:0000381]; regulation of translation [GO:0006417]; RNA export from nucleus [GO:0006405]; termination of RNA polymerase II transcription …	mRNA binding [GO:0003729]; RNA binding [GO:0003723]
P51991;H7C1J8	0.847366	0.732323	P51991	HNRNPA3	Heterogeneous nuclear ribonucleoprotein A3 (hnRNP A3)	378	n	catalytic step 2 spliceosome [GO:0071013]; cytoplasm [GO:0005737]; intracellular ribonucleoprotein complex [GO:0030529]; messenger ribonucleoprotein complex [GO:1990124]; neuron projection [GO:0043005]; nucleoplasm [GO:0005654]; nucleus [GO:0005634]; ribonucleoprotein granule [GO:0035770]	mRNA splicing, via spliceosome [GO:0000398]; mRNA transport [GO:0051028]; RNA metabolic process [GO:0016070]	mRNA binding [GO:0003729]; RNA binding [GO:0003723]; RNA transmembrane transporter activity [GO:0051033]
Q9UMS4;F5GY56;H0YGF3;F5H2I0;H0YGZ5	0.102946	0.0482499	Q9UMS4	PRPF19	Pre-mRNA-processing factor 19 (EC 2.3.2.27) (Nuclear matrix protein 200) (PRP19/PSO4 homolog) (hPso4) (RING-type E3 ubiquitin transferase PRP19) (Senescence evasion factor)	504	n	catalytic step 2 spliceosome [GO:0071013]; cytoplasm [GO:0005737]; lipid particle [GO:0005811]; membrane [GO:0016020]; nuclear speck [GO:0016607]; nucleoplasm [GO:0005654]; nucleus [GO:0005634]; Prp19 complex [GO:0000974]; site of double-strand break [GO:0035861]; spindle [GO:0005819]; U2-type catalytic step 1 spliceosome [GO:0071006]	cellular protein localization [GO:0034613]; double-strand break repair via nonhomologous end joining [GO:0006303]; generation of catalytic spliceosome for first transesterification step [GO:0000349]; inner cell mass cell proliferation [GO:0001833]; lipid biosynthetic process [GO:0008610]; mRNA splicing, via spliceosome [GO:0000398]; negative regulation of neuron differentiation [GO:0045665]; posi…	identical protein binding [GO:0042802]; ubiquitin protein ligase activity [GO:0061630]; ubiquitin-ubiquitin ligase activity [GO:0034450]
P07910;G3V2Q1;G3V576;G3V555;G3V575	-0.965001	0.651003	P07910	HNRNPC	Heterogeneous nuclear ribonucleoproteins C1/C2 (hnRNP C1/C2)	306	n	catalytic step 2 spliceosome [GO:0071013]; cytosol [GO:0005829]; extracellular exosome [GO:0070062]; membrane [GO:0016020]; nuclear chromatin [GO:0000790]; nucleoplasm [GO:0005654]; nucleus [GO:0005634]; protein complex [GO:0043234]; spliceosomal complex [GO:0005681]	3'-UTR-mediated mRNA stabilization [GO:0070935]; ATP-dependent chromatin remodeling [GO:0043044]; mRNA splicing, via spliceosome [GO:0000398]; negative regulation of telomere maintenance via telomerase [GO:0032211]; osteoblast differentiation [GO:0001649]; RNA metabolic process [GO:0016070]; RNA splicing [GO:0008380]	identical protein binding [GO:0042802]; mRNA 3'-UTR binding [GO:0003730]; N6-methyladenosine-containing RNA binding [GO:1990247]; nucleosomal DNA binding [GO:0031492]; poly(U) RNA binding [GO:0008266]; RNA binding [GO:0003723]; RNA polymerase II core promoter proximal region sequence-specific DNA binding [GO:0000978]; RNA polymerase II distal enhancer sequence-specific DNA binding [GO:0000980]; t…
P52597;A0A1B0GW42	0.235468	0.229924	P52597	HNRNPF	Heterogeneous nuclear ribonucleoprotein F (hnRNP F) (Nucleolin-like protein mcs94-1) [Cleaved into: Heterogeneous nuclear ribonucleoprotein F, N-terminally processed]	415	n	catalytic step 2 spliceosome [GO:0071013]; cytosol [GO:0005829]; membrane [GO:0016020]; nucleoplasm [GO:0005654]; nucleus [GO:0005634]	fibroblast growth factor receptor signaling pathway [GO:0008543]; mRNA splicing, via spliceosome [GO:0000398]; regulation of RNA splicing [GO:0043484]; RNA metabolic process [GO:0016070]; RNA processing [GO:0006396]	RNA binding [GO:0003723]; single-stranded RNA binding [GO:0003727]; TBP-class protein binding [GO:0017025]
Q96DI7;Q9NSS8	-0.521347	0.412273	Q96DI7	SNRNP40	U5 small nuclear ribonucleoprotein 40 kDa protein (U5 snRNP 40 kDa protein) (U5-40K) (38 kDa-splicing factor) (Prp8-binding protein) (hPRP8BP) (U5 snRNP-specific 40 kDa protein) (WD repeat-containing protein 57)	357	n	catalytic step 2 spliceosome [GO:0071013]; cytosol [GO:0005829]; nuclear speck [GO:0016607]; nucleoplasm [GO:0005654]; precatalytic spliceosome [GO:0071011]; small nucleolar ribonucleoprotein complex [GO:0005732]; U5 snRNP [GO:0005682]	mRNA splicing, via spliceosome [GO:0000398]; RNA processing [GO:0006396]; RNA splicing [GO:0008380]; RNA splicing, via transesterification reactions [GO:0000375]	RNA binding [GO:0003723]
P52272;A0A087X0X3;M0R2T0;M0R019;M0R2I7;M0R0N3;M0QYQ7;M0QY96;M0QYL3;M0R0Y6	1.19927	1.13623	P52272	HNRNPM	Heterogeneous nuclear ribonucleoprotein M (hnRNP M)	730	n	catalytic step 2 spliceosome [GO:0071013]; extracellular exosome [GO:0070062]; extracellular matrix [GO:0031012]; integral component of plasma membrane [GO:0005887]; membrane [GO:0016020]; nuclear matrix [GO:0016363]; nucleolus [GO:0005730]; nucleoplasm [GO:0005654]; paraspeckles [GO:0042382]; spliceosomal complex [GO:0005681]	alternative mRNA splicing, via spliceosome [GO:0000380]; fibroblast growth factor receptor signaling pathway [GO:0008543]; mRNA splicing, via spliceosome [GO:0000398]; RNA metabolic process [GO:0016070]	protein domain specific binding [GO:0019904]; RNA binding [GO:0003723]
P38159;H0Y6E7;H3BT71;H3BUY5;H3BR27;H3BNC1;O75526;Q8IZ40;Q8N7X1	0.205167	0.10458	P38159	RBMX	RNA-binding motif protein, X chromosome (Glycoprotein p43) (Heterogeneous nuclear ribonucleoprotein G) (hnRNP G) [Cleaved into: RNA-binding motif protein, X chromosome, N-terminally processed]	391	n	catalytic step 2 spliceosome [GO:0071013]; extracellular exosome [GO:0070062]; extracellular space [GO:0005615]; intracellular ribonucleoprotein complex [GO:0030529]; membrane [GO:0016020]; nuclear euchromatin [GO:0005719]; nucleoplasm [GO:0005654]; nucleus [GO:0005634]; supraspliceosomal complex [GO:0044530]	cellular response to interleukin-1 [GO:0071347]; membrane protein ectodomain proteolysis [GO:0006509]; mRNA splicing, via spliceosome [GO:0000398]; negative regulation of mRNA splicing, via spliceosome [GO:0048025]; osteoblast differentiation [GO:0001649]; positive regulation of mRNA splicing, via spliceosome [GO:0048026]; positive regulation of transcription from RNA polymerase II promoter [GO:0…	chromatin binding [GO:0003682]; core promoter binding [GO:0001047]; identical protein binding [GO:0042802]; mRNA binding [GO:0003729]; protein domain specific binding [GO:0019904]; RNA binding [GO:0003723]
P08579	-0.971173	0.742432	P08579	SNRPB2	U2 small nuclear ribonucleoprotein B'' (U2 snRNP B'')	225	n	catalytic step 2 spliceosome [GO:0071013]; fibrillar center [GO:0001650]; nuclear speck [GO:0016607]; nucleoplasm [GO:0005654]; spliceosomal complex [GO:0005681]; U1 snRNP [GO:0005685]; U2 snRNP [GO:0005686]	mRNA splicing, via spliceosome [GO:0000398]	snRNA stem-loop binding [GO:0035614]; snRNP binding [GO:0070990]; U1 snRNA binding [GO:0030619]
Q6P2Q9;I3L0J9;I3L3Z8	-0.395605	0.26905	Q6P2Q9	PRPF8	Pre-mRNA-processing-splicing factor 8 (220 kDa U5 snRNP-specific protein) (PRP8 homolog) (Splicing factor Prp8) (p220)	2335	n	catalytic step 2 spliceosome [GO:0071013]; membrane [GO:0016020]; nuclear speck [GO:0016607]; nucleoplasm [GO:0005654]; nucleus [GO:0005634]; U4/U6 x U5 tri-snRNP complex [GO:0046540]; U5 snRNP [GO:0005682]	cellular response to lipopolysaccharide [GO:0071222]; cellular response to tumor necrosis factor [GO:0071356]; mRNA processing [GO:0006397]; mRNA splicing, via spliceosome [GO:0000398]; RNA splicing [GO:0008380]; RNA splicing, via transesterification reactions [GO:0000375]; spliceosomal tri-snRNP complex assembly [GO:0000244]	K63-linked polyubiquitin binding [GO:0070530]; pre-mRNA intronic binding [GO:0097157]; RNA binding [GO:0003723]; second spliceosomal transesterification activity [GO:0000386]; U1 snRNA binding [GO:0030619]; U2 snRNA binding [GO:0030620]; U5 snRNA binding [GO:0030623]; U6 snRNA binding [GO:0017070]
O75643;B4E0P5	-0.290728	0.164266	O75643	SNRNP200	U5 small nuclear ribonucleoprotein 200 kDa helicase (EC 3.6.4.13) (Activating signal cointegrator 1 complex subunit 3-like 1) (BRR2 homolog) (U5 snRNP-specific 200 kDa protein) (U5-200KD)	2136	n	catalytic step 2 spliceosome [GO:0071013]; membrane [GO:0016020]; nucleoplasm [GO:0005654]; nucleus [GO:0005634]; spliceosomal complex [GO:0005681]; U4/U6 x U5 tri-snRNP complex [GO:0046540]; U5 snRNP [GO:0005682]	cis assembly of pre-catalytic spliceosome [GO:0000354]; mRNA splicing, via spliceosome [GO:0000398]; osteoblast differentiation [GO:0001649]	ATP binding [GO:0005524]; ATP-dependent helicase activity [GO:0008026]; ATP-dependent RNA helicase activity [GO:0004004]; identical protein binding [GO:0042802]; RNA binding [GO:0003723]
Q9P013	0.0487661	0.019699	Q9P013	CWC15	Spliceosome-associated protein CWC15 homolog	229	n	catalytic step 2 spliceosome [GO:0071013]; mitochondrion [GO:0005739]; nuclear speck [GO:0016607]; nucleoplasm [GO:0005654]; nucleus [GO:0005634]; spliceosomal complex [GO:0005681]	mRNA splicing, via spliceosome [GO:0000398]	RNA binding [GO:0003723]
O75533;B4DGZ4;F8WC19;H7C341	3.33773	2.10524	O75533	SF3B1	Splicing factor 3B subunit 1 (Pre-mRNA-splicing factor SF3b 155 kDa subunit) (SF3b155) (Spliceosome-associated protein 155) (SAP 155)	1304	n	catalytic step 2 spliceosome [GO:0071013]; nuclear speck [GO:0016607]; nucleoplasm [GO:0005654]; nucleus [GO:0005634]; spliceosomal complex [GO:0005681]; U11/U12 snRNP [GO:0034693]; U12-type spliceosomal complex [GO:0005689]; U2 snRNP [GO:0005686]; U2-type prespliceosome [GO:0071004]	mRNA splicing, via spliceosome [GO:0000398]; positive regulation of gene expression, epigenetic [GO:0045815]; RNA splicing, via transesterification reactions [GO:0000375]; spliceosomal complex assembly [GO:0000245]	mRNA binding [GO:0003729]; RNA binding [GO:0003723]
P09661;H0YMA0;H0YKK0;H0YLR3	0.211865	0.0958869	P09661	SNRPA1	U2 small nuclear ribonucleoprotein A' (U2 snRNP A')	255	n	catalytic step 2 spliceosome [GO:0071013]; nuclear speck [GO:0016607]; nucleoplasm [GO:0005654]; small nuclear ribonucleoprotein complex [GO:0030532]; spliceosomal complex [GO:0005681]; U2 snRNP [GO:0005686]	mRNA splicing, via spliceosome [GO:0000398]; RNA splicing [GO:0008380]	RNA binding [GO:0003723]; U2 snRNA binding [GO:0030620]
Q15428;K7EMT0	-0.838037	0.757014	Q15428	SF3A2	Splicing factor 3A subunit 2 (SF3a66) (Spliceosome-associated protein 62) (SAP 62)	464	n	catalytic step 2 spliceosome [GO:0071013]; nuclear speck [GO:0016607]; nucleoplasm [GO:0005654]; small nuclear ribonucleoprotein complex [GO:0030532]; spliceosomal complex [GO:0005681]; U2 snRNP [GO:0005686]; U2-type prespliceosome [GO:0071004]	mRNA 3'-splice site recognition [GO:0000389]; mRNA processing [GO:0006397]; mRNA splicing, via spliceosome [GO:0000398]; positive regulation of neuron projection development [GO:0010976]; RNA splicing [GO:0008380]	RNA binding [GO:0003723]; zinc ion binding [GO:0008270]
Q12874	-0.223556	0.10458	Q12874	SF3A3	Splicing factor 3A subunit 3 (SF3a60) (Spliceosome-associated protein 61) (SAP 61)	501	n	catalytic step 2 spliceosome [GO:0071013]; nuclear speck [GO:0016607]; nucleoplasm [GO:0005654]; spliceosomal complex [GO:0005681]	mRNA 3'-splice site recognition [GO:0000389]; mRNA processing [GO:0006397]; mRNA splicing, via spliceosome [GO:0000398]; RNA splicing [GO:0008380]; RNA splicing, via transesterification reactions [GO:0000375]	RNA binding [GO:0003723]; zinc ion binding [GO:0008270]
Q15393;H3BMB0;J3QRB2;J3QL37;I3L4G7	1.31479	0.794153	Q15393	SF3B3	Splicing factor 3B subunit 3 (Pre-mRNA-splicing factor SF3b 130 kDa subunit) (SF3b130) (STAF130) (Spliceosome-associated protein 130) (SAP 130)	1217	n	catalytic step 2 spliceosome [GO:0071013]; nucleolus [GO:0005730]; nucleoplasm [GO:0005654]; nucleus [GO:0005634]; small nuclear ribonucleoprotein complex [GO:0030532]; spliceosomal complex [GO:0005681]; U12-type spliceosomal complex [GO:0005689]	mRNA processing [GO:0006397]; mRNA splicing, via spliceosome [GO:0000398]; negative regulation of protein catabolic process [GO:0042177]; protein complex assembly [GO:0006461]; RNA splicing [GO:0008380]; RNA splicing, via transesterification reactions [GO:0000375]	protein complex binding [GO:0032403]; RNA binding [GO:0003723]
Q9UKM9;Q5QPL9;Q5QPM1;Q5QPM0;Q5QPM2	0.158557	0.0929305	Q9UKM9	RALY	RNA-binding protein Raly (Autoantigen p542) (Heterogeneous nuclear ribonucleoprotein C-like 2) (hnRNP core protein C-like 2) (hnRNP associated with lethal yellow protein homolog)	306	n	catalytic step 2 spliceosome [GO:0071013]; nucleus [GO:0005634]	mRNA splicing, via spliceosome [GO:0000398]; regulation of cholesterol homeostasis [GO:2000188]; regulation of nucleic acid-templated transcription [GO:1903506]; regulation of transcription, DNA-templated [GO:0006355]; transcription, DNA-templated [GO:0006351]	RNA binding [GO:0003723]; transcription cofactor activity [GO:0003712]
Q9C0C2;E9PKK0	-0.101745	0.0482499	Q9C0C2	TNKS1BP1	182 kDa tankyrase-1-binding protein	1729	x	CCR4-NOT complex [GO:0030014]; cell-cell adherens junction [GO:0005913]; cytoplasm [GO:0005737]; cytoskeleton [GO:0005856]; cytosol [GO:0005829]; nuclear heterochromatin [GO:0005720]; nucleus [GO:0005634]	cellular response to ionizing radiation [GO:0071479]; DNA damage response, signal transduction by p53 class mediator resulting in cell cycle arrest [GO:0006977]; double-strand break repair [GO:0006302]; nuclear-transcribed mRNA poly(A) tail shortening [GO:0000289]; positive regulation of peptidyl-serine phosphorylation [GO:0033138]; positive regulation of peptidyl-threonine phosphorylation [GO:00…	ankyrin repeat binding [GO:0071532]; cadherin binding [GO:0045296]; enzyme binding [GO:0019899]; macromolecular complex binding [GO:0044877]
A0A0A0MSI0;Q06830;A0A0A0MRQ5;P32119	0.584472	0.572276	A0A0A0MSI0	PRDX1	Peroxiredoxin-1 (Fragment)	171	x	cell [GO:0005623]	cell redox homeostasis [GO:0045454]	antioxidant activity [GO:0016209]; oxidoreductase activity [GO:0016491]
P62753;A2A3R5;A2A3R7	0.234721	0.193883	P62753	RPS6	40S ribosomal protein S6 (Phosphoprotein NP33) (Small ribosomal subunit protein eS6)	249	n	cell body [GO:0044297]; cytoplasmic ribonucleoprotein granule [GO:0036464]; cytosol [GO:0005829]; cytosolic small ribosomal subunit [GO:0022627]; dendrite [GO:0030425]; intracellular ribonucleoprotein complex [GO:0030529]; membrane [GO:0016020]; nucleolus [GO:0005730]; nucleoplasm [GO:0005654]; nucleus [GO:0005634]; small ribosomal subunit [GO:0015935]	glucose homeostasis [GO:0042593]; nuclear-transcribed mRNA catabolic process, nonsense-mediated decay [GO:0000184]; positive regulation of apoptotic process [GO:0043065]; ribosomal small subunit biogenesis [GO:0042274]; rRNA processing [GO:0006364]; SRP-dependent cotranslational protein targeting to membrane [GO:0006614]; TOR signaling [GO:0031929]; translation [GO:0006412]; translational initiat…	protein kinase binding [GO:0019901]; RNA binding [GO:0003723]; structural constituent of ribosome [GO:0003735]
Q14247;H0YCD9;H0YEV2	0.651417	0.755011	Q14247	CTTN	Src substrate cortactin (Amplaxin) (Oncogene EMS1)	550	c	cell cortex [GO:0005938]; clathrin-coated pit [GO:0005905]; cortical cytoskeleton [GO:0030863]; cytoplasm [GO:0005737]; cytoskeleton [GO:0005856]; cytosol [GO:0005829]; dendritic spine [GO:0043197]; extracellular exosome [GO:0070062]; focal adhesion [GO:0005925]; Golgi apparatus [GO:0005794]; intracellular membrane-bounded organelle [GO:0043231]; lamellipodium [GO:0030027]; mitotic spindle midzon…	actin cytoskeleton reorganization [GO:0031532]; actin filament polymerization [GO:0030041]; cell motility [GO:0048870]; dendritic spine maintenance [GO:0097062]; focal adhesion assembly [GO:0048041]; intracellular protein transport [GO:0006886]; lamellipodium organization [GO:0097581]; membrane organization [GO:0061024]; negative regulation of extrinsic apoptotic signaling pathway [GO:2001237]; n…	cadherin binding [GO:0045296]; profilin binding [GO:0005522]
Q9ULJ8	0.55257	0.346688	Q9ULJ8	PPP1R9A	Neurabin-1 (Neurabin-I) (Neural tissue-specific F-actin-binding protein I) (Protein phosphatase 1 regulatory subunit 9A)	1098	c	cell junction [GO:0030054]; cortical actin cytoskeleton [GO:0030864]; cytosol [GO:0005829]; dendritic spine neck [GO:0044326]; filopodium [GO:0030175]; growth cone lamellipodium [GO:1990761]; neuromuscular junction [GO:0031594]; neuronal cell body [GO:0043025]; postsynaptic density [GO:0014069]	actin filament organization [GO:0007015]; aging [GO:0007568]; calcium-mediated signaling [GO:0019722]; cellular response to toxic substance [GO:0097237]; excitatory postsynaptic potential [GO:0060079]; negative regulation of long-term synaptic potentiation [GO:1900272]; negative regulation of spontaneous neurotransmitter secretion [GO:1904049]; negative regulation of stress fiber assembly [GO:005…	actin filament binding [GO:0051015]; GTPase binding [GO:0051020]; ion channel binding [GO:0044325]; protein C-terminus binding [GO:0008022]; protein domain specific binding [GO:0019904]; protein homodimerization activity [GO:0042803]; protein kinase binding [GO:0019901]; protein phosphatase 1 binding [GO:0008157]
Q14451	-1.28994	1.01262	Q14451	GRB7	Growth factor receptor-bound protein 7 (B47) (Epidermal growth factor receptor GRB-7) (GRB7 adapter protein)	532	pm	cell projection [GO:0042995]; cytoplasmic stress granule [GO:0010494]; cytosol [GO:0005829]; focal adhesion [GO:0005925]; plasma membrane [GO:0005886]	axon guidance [GO:0007411]; epidermal growth factor receptor signaling pathway [GO:0007173]; ERBB2 signaling pathway [GO:0038128]; leukocyte migration [GO:0050900]; negative regulation of translation [GO:0017148]; positive regulation of cell migration [GO:0030335]; stress granule assembly [GO:0034063]	identical protein binding [GO:0042802]; phosphatidylinositol binding [GO:0035091]; protein kinase binding [GO:0019901]; RNA binding [GO:0003723]; SH3/SH2 adaptor activity [GO:0005070]
P10809	-1.23124	1.06227	P10809	HSPD1	60 kDa heat shock protein, mitochondrial (EC 3.6.4.9) (60 kDa chaperonin) (Chaperonin 60) (CPN60) (Heat shock protein 60) (HSP-60) (Hsp60) (HuCHA60) (Mitochondrial matrix protein P1) (P60 lymphocyte protein)	573	pm	cell surface [GO:0009986]; clathrin-coated pit [GO:0005905]; coated vesicle [GO:0030135]; cytoplasm [GO:0005737]; cytosol [GO:0005829]; early endosome [GO:0005769]; extracellular exosome [GO:0070062]; extracellular matrix [GO:0031012]; extracellular space [GO:0005615]; Golgi apparatus [GO:0005794]; lipopolysaccharide receptor complex [GO:0046696]; membrane [GO:0016020]; membrane raft [GO:0045121]…	'de novo' protein folding [GO:0006458]; activation of cysteine-type endopeptidase activity involved in apoptotic process [GO:0006919]; apoptotic mitochondrial changes [GO:0008637]; B cell activation [GO:0042113]; B cell cytokine production [GO:0002368]; B cell proliferation [GO:0042100]; chaperone-mediated protein complex assembly [GO:0051131]; chaperone-mediated protein folding [GO:0061077]; cha…	apolipoprotein A-I binding [GO:0034186]; apolipoprotein binding [GO:0034185]; ATPase activity [GO:0016887]; ATP binding [GO:0005524]; chaperone binding [GO:0051087]; DNA replication origin binding [GO:0003688]; double-stranded RNA binding [GO:0003725]; enzyme binding [GO:0019899]; high-density lipoprotein particle binding [GO:0008035]; insulin binding [GO:0043559]; lipopolysaccharide binding [GO:…
P14174	0.2789	0.065434	P14174	MIF	Macrophage migration inhibitory factor (MIF) (EC 5.3.2.1) (Glycosylation-inhibiting factor) (GIF) (L-dopachrome isomerase) (L-dopachrome tautomerase) (EC 5.3.3.12) (Phenylpyruvate tautomerase)	115	pm	cell surface [GO:0009986]; cytosol [GO:0005829]; extracellular exosome [GO:0070062]; extracellular region [GO:0005576]; ficolin-1-rich granule lumen [GO:1904813]; myelin sheath [GO:0043209]; nucleoplasm [GO:0005654]; secretory granule lumen [GO:0034774]; vesicle [GO:0031982]	carboxylic acid metabolic process [GO:0019752]; cell aging [GO:0007569]; cell proliferation [GO:0008283]; cell surface receptor signaling pathway [GO:0007166]; DNA damage response, signal transduction by p53 class mediator [GO:0030330]; inflammatory response [GO:0006954]; innate immune response [GO:0045087]; leukocyte migration [GO:0050900]; negative regulation of apoptotic process [GO:0043066]; …	chemoattractant activity [GO:0042056]; cytokine activity [GO:0005125]; cytokine receptor binding [GO:0005126]; dopachrome isomerase activity [GO:0004167]; phenylpyruvate tautomerase activity [GO:0050178]; receptor binding [GO:0005102]
P11021	-2.10137	1.71331	P11021	HSPA5	78 kDa glucose-regulated protein (GRP-78) (Endoplasmic reticulum lumenal Ca(2+)-binding protein grp78) (Heat shock 70 kDa protein 5) (Immunoglobulin heavy chain-binding protein) (BiP)	654	pm	cell surface [GO:0009986]; endoplasmic reticulum [GO:0005783]; endoplasmic reticulum chaperone complex [GO:0034663]; endoplasmic reticulum-Golgi intermediate compartment [GO:0005793]; endoplasmic reticulum lumen [GO:0005788]; endoplasmic reticulum membrane [GO:0005789]; extracellular exosome [GO:0070062]; extracellular matrix [GO:0031012]; focal adhesion [GO:0005925]; integral component of endopl…	activation of signaling protein activity involved in unfolded protein response [GO:0006987]; ATF6-mediated unfolded protein response [GO:0036500]; cellular response to antibiotic [GO:0071236]; cellular response to calcium ion [GO:0071277]; cellular response to cAMP [GO:0071320]; cellular response to drug [GO:0035690]; cellular response to glucose starvation [GO:0042149]; cellular response to inte…	ATPase activity [GO:0016887]; ATP binding [GO:0005524]; cadherin binding [GO:0045296]; calcium ion binding [GO:0005509]; chaperone binding [GO:0051087]; enzyme binding [GO:0019899]; glycoprotein binding [GO:0001948]; misfolded protein binding [GO:0051787]; protein domain specific binding [GO:0019904]; ribosome binding [GO:0043022]; ubiquitin protein ligase binding [GO:0031625]; unfolded protein b…
P05783;F8VZY9;CON__H-INV:HIT000015463	0.426615	0.282517	P05783	KRT18	Keratin, type I cytoskeletal 18 (Cell proliferation-inducing gene 46 protein) (Cytokeratin-18) (CK-18) (Keratin-18) (K18)	430	x	cell-cell adherens junction [GO:0005913]; cell periphery [GO:0071944]; centriolar satellite [GO:0034451]; cytoplasm [GO:0005737]; cytosol [GO:0005829]; extracellular exosome [GO:0070062]; intermediate filament [GO:0005882]; keratin filament [GO:0045095]; microtubule organizing center [GO:0005815]; nucleolus [GO:0005730]; perinuclear region of cytoplasm [GO:0048471]	anatomical structure morphogenesis [GO:0009653]; cell cycle [GO:0007049]; cornification [GO:0070268]; extrinsic apoptotic signaling pathway [GO:0097191]; Golgi to plasma membrane CFTR protein transport [GO:0043000]; hepatocyte apoptotic process [GO:0097284]; intermediate filament cytoskeleton organization [GO:0045104]; keratinization [GO:0031424]; negative regulation of apoptotic process [GO:0043…	cadherin binding involved in cell-cell adhesion [GO:0098641]; RNA binding [GO:0003723]; scaffold protein binding [GO:0097110]; structural molecule activity [GO:0005198]
Q08211	3.20257	1.7096	Q08211	DHX9	ATP-dependent RNA helicase A (RHA) (EC 3.6.4.13) (DEAH box protein 9) (Leukophysin) (LKP) (Nuclear DNA helicase II) (NDH II)	1270	n	centrosome [GO:0005813]; CRD-mediated mRNA stability complex [GO:0070937]; cytoplasm [GO:0005737]; cytoplasmic ribonucleoprotein granule [GO:0036464]; cytosol [GO:0005829]; intracellular ribonucleoprotein complex [GO:0030529]; membrane [GO:0016020]; micro-ribonucleoprotein complex [GO:0035068]; nuclear body [GO:0016604]; nuclear stress granule [GO:0097165]; nucleolus [GO:0005730]; nucleoplasm [GO…	alternative mRNA splicing, via spliceosome [GO:0000380]; cellular response to exogenous dsRNA [GO:0071360]; CRD-mediated mRNA stabilization [GO:0070934]; DNA duplex unwinding [GO:0032508]; DNA-templated viral transcription [GO:0039695]; mRNA splicing, via spliceosome [GO:0000398]; osteoblast differentiation [GO:0001649]; positive regulation of cytoplasmic translation [GO:2000767]; positive regula…	ATPase activity [GO:0016887]; ATP binding [GO:0005524]; ATP-dependent 3'-5' DNA/RNA helicase activity [GO:0033681]; ATP-dependent 3'-5' DNA helicase activity [GO:0043140]; ATP-dependent 3'-5' RNA helicase activity [GO:0034459]; ATP-dependent DNA helicase activity [GO:0004003]; ATP-dependent RNA helicase activity [GO:0004004]; chromatin DNA binding [GO:0031490]; DNA binding [GO:0003677]; double-st…
P06748;E5RGW4;E5RI98	0.278949	0.24206	P06748	NPM1	Nucleophosmin (NPM) (Nucleolar phosphoprotein B23) (Nucleolar protein NO38) (Numatrin)	294	n	centrosome [GO:0005813]; cytoplasm [GO:0005737]; cytosol [GO:0005829]; focal adhesion [GO:0005925]; intracellular ribonucleoprotein complex [GO:0030529]; membrane [GO:0016020]; nucleolus [GO:0005730]; nucleoplasm [GO:0005654]; nucleus [GO:0005634]; protein complex [GO:0043234]; protein-DNA complex [GO:0032993]; spindle pole centrosome [GO:0031616]	cell aging [GO:0007569]; cellular response to UV [GO:0034644]; CENP-A containing nucleosome assembly [GO:0034080]; centrosome cycle [GO:0007098]; DNA damage response, signal transduction by p53 class mediator resulting in cell cycle arrest [GO:0006977]; DNA repair [GO:0006281]; intracellular protein transport [GO:0006886]; negative regulation of apoptotic process [GO:0043066]; negative regulation…	activating transcription factor binding [GO:0033613]; core promoter binding [GO:0001047]; histone binding [GO:0042393]; NF-kappaB binding [GO:0051059]; protein heterodimerization activity [GO:0046982]; protein homodimerization activity [GO:0042803]; protein kinase binding [GO:0019901]; protein kinase inhibitor activity [GO:0004860]; ribosomal large subunit binding [GO:0043023]; ribosomal small su…
Q9Y230;M0R0Y3;X6R2L4;M0QXI6;M0R0Z0;A0A1W2PS48	0.978237	1.09845	Q9Y230	RUVBL2	RuvB-like 2 (EC 3.6.4.12) (48 kDa TATA box-binding protein-interacting protein) (48 kDa TBP-interacting protein) (51 kDa erythrocyte cytosolic protein) (ECP-51) (INO80 complex subunit J) (Repressing pontin 52) (Reptin 52) (TIP49b) (TIP60-associated protein 54-beta) (TAP54-beta)	463	n	centrosome [GO:0005813]; cytosol [GO:0005829]; extracellular exosome [GO:0070062]; Ino80 complex [GO:0031011]; intracellular [GO:0005622]; intracellular ribonucleoprotein complex [GO:0030529]; membrane [GO:0016020]; MLL1 complex [GO:0071339]; NuA4 histone acetyltransferase complex [GO:0035267]; nuclear euchromatin [GO:0005719]; nuclear matrix [GO:0016363]; nucleoplasm [GO:0005654]; nucleus [GO:00…	box C/D snoRNP assembly [GO:0000492]; cellular response to estradiol stimulus [GO:0071392]; cellular response to UV [GO:0034644]; chromatin remodeling [GO:0006338]; DNA recombination [GO:0006310]; DNA repair [GO:0006281]; establishment of protein localization to chromatin [GO:0071169]; histone H2A acetylation [GO:0043968]; histone H4 acetylation [GO:0043967]; negative regulation of estrogen recep…	ADP binding [GO:0043531]; ATPase binding [GO:0051117]; ATP binding [GO:0005524]; ATP-dependent 5'-3' DNA helicase activity [GO:0043141]; ATP-dependent DNA helicase activity [GO:0004003]; chromatin DNA binding [GO:0031490]; DNA helicase activity [GO:0003678]; identical protein binding [GO:0042802]; protein homodimerization activity [GO:0042803]; RNA polymerase II core promoter sequence-specific DN…
O43809;H3BND3;H3BV41	0.274375	0.256882	O43809	NUDT21	Cleavage and polyadenylation specificity factor subunit 5 (Cleavage and polyadenylation specificity factor 25 kDa subunit) (CFIm25) (CPSF 25 kDa subunit) (Nucleoside diphosphate-linked moiety X motif 21) (Nudix motif 21) (Pre-mRNA cleavage factor Im 25 kDa subunit)	227	n	centrosome [GO:0005813]; microtubule organizing center [GO:0005815]; mRNA cleavage factor complex [GO:0005849]; nuclear body [GO:0016604]; nucleoplasm [GO:0005654]; nucleus [GO:0005634]; paraspeckles [GO:0042382]	mRNA 3'-end processing [GO:0031124]; mRNA polyadenylation [GO:0006378]; mRNA processing [GO:0006397]; mRNA splicing, via spliceosome [GO:0000398]; protein tetramerization [GO:0051262]; termination of RNA polymerase II transcription [GO:0006369]	AU-rich element binding [GO:0017091]; histone deacetylase binding [GO:0042826]; hydrolase activity [GO:0016787]; identical protein binding [GO:0042802]; mRNA binding [GO:0003729]; protein homodimerization activity [GO:0042803]; RNA binding [GO:0003723]
Q9NTI5;A9IYQ1;Q29RF7	-0.642801	0.732323	Q9NTI5	PDS5B	Sister chromatid cohesion protein PDS5 homolog B (Androgen-induced proliferation inhibitor) (Androgen-induced prostate proliferative shutoff-associated protein AS3)	1447	n	chromatin [GO:0000785]; chromosome [GO:0005694]; chromosome, centromeric region [GO:0000775]; cytosol [GO:0005829]; nucleoplasm [GO:0005654]; nucleus [GO:0005634]	cell division [GO:0051301]; cell proliferation [GO:0008283]; DNA repair [GO:0006281]; mitotic sister chromatid cohesion [GO:0007064]; negative regulation of cell proliferation [GO:0008285]; regulation of cell proliferation [GO:0042127]; sister chromatid cohesion [GO:0007062]	ATP binding [GO:0005524]; DNA binding [GO:0003677]
Q13185;S4R2Y4;C9JMM0;B8ZZ43;K7ELA4	0.421677	0.439948	Q13185	CBX3	Chromobox protein homolog 3 (HECH) (Heterochromatin protein 1 homolog gamma) (HP1 gamma) (Modifier 2 protein)	183	n	chromatin [GO:0000785]; chromosome, centromeric region [GO:0000775]; condensed chromosome, centromeric region [GO:0000779]; nuclear chromosome, telomeric region [GO:0000784]; nuclear envelope [GO:0005635]; nuclear euchromatin [GO:0005719]; nuclear heterochromatin [GO:0005720]; nuclear inner membrane [GO:0005637]; nuclear pericentric heterochromatin [GO:0031618]; nucleus [GO:0005634]; spindle [GO:…	chromatin remodeling [GO:0006338]; covalent chromatin modification [GO:0016569]; negative regulation of transcription, DNA-templated [GO:0045892]; rhythmic process [GO:0048511]; transcription, DNA-templated [GO:0006351]	enzyme binding [GO:0019899]; histone methyltransferase binding [GO:1990226]; identical protein binding [GO:0042802]; protein domain specific binding [GO:0019904]
Q13547;Q5TEE2;E5RFI6;E5RJ04;E5RGV4;E5RHE7;E5RH52;E5RG37;E5RFP9;H3BM24;Q96G03	-1.42185	1.25396	Q13547	HDAC1	Histone deacetylase 1 (HD1) (EC 3.5.1.98)	482	n	chromatin [GO:0000785]; cytoplasm [GO:0005737]; cytosol [GO:0005829]; histone deacetylase complex [GO:0000118]; nuclear chromatin [GO:0000790]; nucleoplasm [GO:0005654]; nucleus [GO:0005634]; NuRD complex [GO:0016581]; protein complex [GO:0043234]; Sin3 complex [GO:0016580]	ATP-dependent chromatin remodeling [GO:0043044]; beta-catenin-TCF complex assembly [GO:1904837]; blood coagulation [GO:0007596]; chromatin organization [GO:0006325]; chromatin remodeling [GO:0006338]; circadian regulation of gene expression [GO:0032922]; embryonic digit morphogenesis [GO:0042733]; epidermal cell differentiation [GO:0009913]; eyelid development in camera-type eye [GO:0061029]; fun…	activating transcription factor binding [GO:0033613]; core promoter binding [GO:0001047]; core promoter sequence-specific DNA binding [GO:0001046]; deacetylase activity [GO:0019213]; enzyme binding [GO:0019899]; histone deacetylase activity [GO:0004407]; histone deacetylase binding [GO:0042826]; NAD-dependent histone deacetylase activity (H3-K14 specific) [GO:0032041]; NF-kappaB binding [GO:00510…
P23246;H0Y9K7;H0Y9U2	3.56023	1.95144	P23246	SFPQ	Splicing factor, proline- and glutamine-rich (100 kDa DNA-pairing protein) (hPOMp100) (DNA-binding p52/p100 complex, 100 kDa subunit) (Polypyrimidine tract-binding protein-associated-splicing factor) (PSF) (PTB-associated-splicing factor)	707	n	chromatin [GO:0000785]; cytoplasm [GO:0005737]; extracellular matrix [GO:0031012]; nuclear matrix [GO:0016363]; nuclear speck [GO:0016607]; nucleoplasm [GO:0005654]; nucleus [GO:0005634]; paraspeckles [GO:0042382]; RNA polymerase II transcription factor complex [GO:0090575]	alternative mRNA splicing, via spliceosome [GO:0000380]; double-strand break repair via homologous recombination [GO:0000724]; histone H3 deacetylation [GO:0070932]; mRNA processing [GO:0006397]; negative regulation of circadian rhythm [GO:0042754]; negative regulation of transcription, DNA-templated [GO:0045892]; negative regulation of transcription from RNA polymerase II promoter [GO:0000122]; …	chromatin binding [GO:0003682]; core promoter binding [GO:0001047]; DNA binding [GO:0003677]; histone deacetylase binding [GO:0042826]; protein homodimerization activity [GO:0042803]; RNA binding [GO:0003723]; RNA polymerase II distal enhancer sequence-specific DNA binding [GO:0000980]; transcription regulatory region DNA binding [GO:0044212]; transcription regulatory region sequence-specific DNA…
P45973;F8VNY3	1.5532	1.40143	P45973	CBX5	Chromobox protein homolog 5 (Antigen p25) (Heterochromatin protein 1 homolog alpha) (HP1 alpha)	191	n	chromocenter [GO:0010369]; histone deacetylase complex [GO:0000118]; histone methyltransferase complex [GO:0035097]; kinetochore [GO:0000776]; nuclear chromosome, telomeric region [GO:0000784]; nuclear envelope [GO:0005635]; nuclear heterochromatin [GO:0005720]; nuclear pericentric heterochromatin [GO:0031618]; nucleolus [GO:0005730]; nucleoplasm [GO:0005654]; nucleus [GO:0005634]; pericentric he…	blood coagulation [GO:0007596]; negative regulation of transcription, DNA-templated [GO:0045892]; viral process [GO:0016032]	chromatin binding [GO:0003682]; histone deacetylase binding [GO:0042826]; methylated histone binding [GO:0035064]; protein binding, bridging [GO:0030674]; protein homodimerization activity [GO:0042803]; repressing transcription factor binding [GO:0070491]
J3KTL8;A6NHR9	-1.14306	1.12595	J3KTL8	SMCHD1	Structural maintenance of chromosomes flexible hinge domain-containing protein 1 (Fragment)	1388	n	chromosome [GO:0005694]	chromosome organization [GO:0051276]	ATP binding [GO:0005524]
Q14683;G8JLG1;H0Y7K8;V9GY57;V9GYN9	-2.2263	1.50128	Q14683	SMC1A	Structural maintenance of chromosomes protein 1A (SMC protein 1A) (SMC-1-alpha) (SMC-1A) (Sb1.8)	1233	n	chromosome [GO:0005694]; chromosome, centromeric region [GO:0000775]; cohesin complex [GO:0008278]; condensed chromosome kinetochore [GO:0000777]; condensed nuclear chromosome [GO:0000794]; cytosol [GO:0005829]; kinetochore [GO:0000776]; meiotic cohesin complex [GO:0030893]; nucleoplasm [GO:0005654]; nucleus [GO:0005634]	cell division [GO:0051301]; DNA repair [GO:0006281]; meiotic cell cycle [GO:0051321]; mitotic sister chromatid cohesion [GO:0007064]; mitotic sister chromatid segregation [GO:0000070]; mitotic spindle organization [GO:0007052]; negative regulation of DNA endoreduplication [GO:0032876]; response to DNA damage checkpoint signaling [GO:0072423]; response to radiation [GO:0009314]; sister chromatid c…	ATP binding [GO:0005524]; chromatin binding [GO:0003682]; mediator complex binding [GO:0036033]; protein heterodimerization activity [GO:0046982]; RNA binding [GO:0003723]
P07199	0.837866	0.742432	P07199	CENPB	Major centromere autoantigen B (Centromere protein B) (CENP-B)	599	n	chromosome [GO:0005694]; chromosome, centromeric region [GO:0000775]; condensed nuclear chromosome, centromeric region [GO:0000780]; nuclear body [GO:0016604]; nuclear pericentric heterochromatin [GO:0031618]		centromeric DNA binding [GO:0019237]; chromatin binding [GO:0003682]; satellite DNA binding [GO:0003696]; sequence-specific DNA binding [GO:0043565]
Q9NVP1;H7C452	2.5096	1.68507	Q9NVP1	DDX18	ATP-dependent RNA helicase DDX18 (EC 3.6.4.13) (DEAD box protein 18) (Myc-regulated DEAD box protein) (MrDb)	670	n	chromosome [GO:0005694]; cytoplasm [GO:0005737]; membrane [GO:0016020]; nucleolus [GO:0005730]	cellular response to estradiol stimulus [GO:0071392]; RNA secondary structure unwinding [GO:0010501]	ATP binding [GO:0005524]; ATP-dependent RNA helicase activity [GO:0004004]; RNA binding [GO:0003723]
B5MCF9;O00541;B3KXD6;H7BYY8	-0.355486	0.193184	B5MCF9	PES1	Pescadillo homolog	571	n	chromosome [GO:0005694]; cytosol [GO:0005829]; nucleolus [GO:0005730]; nucleoplasm [GO:0005654]; nucleus [GO:0005634]; preribosome, large subunit precursor [GO:0030687]	maturation of 5.8S rRNA from tricistronic rRNA transcript (SSU-rRNA, 5.8S rRNA, LSU-rRNA) [GO:0000466]; maturation of LSU-rRNA from tricistronic rRNA transcript (SSU-rRNA, 5.8S rRNA, LSU-rRNA) [GO:0000463]	ribonucleoprotein complex binding [GO:0043021]
Q15397	0.346744	0.309455	Q15397	PUM3	Pumilio homolog 3 (HBV X-transactivated gene 5 protein) (HBV XAg-transactivated protein 5) (Minor histocompatibility antigen HA-8) (HLA-HA8)	648	n	chromosome [GO:0005694]; endoplasmic reticulum [GO:0005783]; nucleolus [GO:0005730]; nucleoplasm [GO:0005654]	regulation of protein ADP-ribosylation [GO:0010835]; regulation of translation [GO:0006417]	DNA binding [GO:0003677]; mRNA binding [GO:0003729]; RNA binding [GO:0003723]
Q14676;A2AB05	-0.329874	0.19613	Q14676	MDC1	Mediator of DNA damage checkpoint protein 1 (Nuclear factor with BRCT domains 1)	2089	n	chromosome [GO:0005694]; focal adhesion [GO:0005925]; nuclear body [GO:0016604]; nucleoplasm [GO:0005654]; nucleus [GO:0005634]	double-strand break repair via nonhomologous end joining [GO:0006303]; intra-S DNA damage checkpoint [GO:0031573]	FHA domain binding [GO:0070975]; protein C-terminus binding [GO:0008022]
Q5SSJ5;B0QZK4;X6RGJ2;Q5SWC8;B0QZK9;B0QZK8	-0.185644	0.0491103	Q5SSJ5	HP1BP3	Heterochromatin protein 1-binding protein 3 (Protein HP1-BP74)	553	n	chromosome [GO:0005694]; nuclear speck [GO:0016607]; nucleosome [GO:0000786]; nucleus [GO:0005634]	cellular response to hypoxia [GO:0071456]; heterochromatin organization [GO:0070828]; nucleosome assembly [GO:0006334]; regulation of cell proliferation [GO:0042127]; regulation of nucleus size [GO:0097298]; regulation of transcription, DNA-templated [GO:0006355]	DNA binding [GO:0003677]; nucleosome binding [GO:0031491]
Q9UK61;A0A087X0F1	-0.37717	0.367917	Q9UK61	FAM208A	Protein TASOR (CTCL tumor antigen se89-1) (Retinoblastoma-associated protein RAP140) (Transgene activation suppressor protein)	1670	n	chromosome [GO:0005694]; nucleoplasm [GO:0005654]	regulation of transcription, DNA-templated [GO:0006355]; transcription, DNA-templated [GO:0006351]	RNA binding [GO:0003723]
P46013	-0.317559	0.10745	P46013	MKI67	Proliferation marker protein Ki-67 (Antigen identified by monoclonal antibody Ki-67) (Antigen KI-67) (Antigen Ki67)	3256	n	chromosome, centromeric region [GO:0000775]; condensed chromosome [GO:0000793]; cytoplasm [GO:0005737]; membrane [GO:0016020]; nuclear body [GO:0016604]; nucleolus [GO:0005730]; nucleus [GO:0005634]	animal organ regeneration [GO:0031100]; cell proliferation [GO:0008283]; cellular response to heat [GO:0034605]; DNA metabolic process [GO:0006259]; hyaluronan metabolic process [GO:0030212]; meiotic cell cycle [GO:0051321]; regulation of chromatin organization [GO:1902275]; regulation of chromosome segregation [GO:0051983]; regulation of mitotic nuclear division [GO:0007088]; response to organic…	ATP binding [GO:0005524]; DNA binding [GO:0003677]; protein C-terminus binding [GO:0008022]; RNA binding [GO:0003723]
A0A087WVQ6;Q00610;J3KS13;A0A087WX41;P53675;K7EJJ5;J3KSQ2;J3KRF5;J3QL20;F5H5N6	-0.434083	0.468328	A0A087WVQ6	CLTC	Clathrin heavy chain	1679	c	clathrin coat of coated pit [GO:0030132]; clathrin coat of trans-Golgi network vesicle [GO:0030130]; clathrin complex [GO:0071439]; endosome [GO:0005768]; lysosome [GO:0005764]; mitochondrion [GO:0005739]; myelin sheath [GO:0043209]	clathrin coat assembly [GO:0048268]; intracellular protein transport [GO:0006886]; vesicle-mediated transport [GO:0016192]	clathrin light chain binding [GO:0032051]; protein kinase binding [GO:0019901]; structural molecule activity [GO:0005198]
P11388;J3KTB7;J3QR57	-0.318294	0.245615	P11388	TOP2A	DNA topoisomerase 2-alpha (EC 5.99.1.3) (DNA topoisomerase II, alpha isozyme)	1531	n	condensed chromosome [GO:0000793]; cytoplasm [GO:0005737]; DNA topoisomerase complex (ATP-hydrolyzing) [GO:0009330]; nucleolus [GO:0005730]; nucleoplasm [GO:0005654]; nucleus [GO:0005634]; protein complex [GO:0043234]	apoptotic chromosome condensation [GO:0030263]; cellular response to DNA damage stimulus [GO:0006974]; chromosome segregation [GO:0007059]; DNA ligation [GO:0006266]; DNA topological change [GO:0006265]; embryonic cleavage [GO:0040016]; hematopoietic progenitor cell differentiation [GO:0002244]; mitotic DNA integrity checkpoint [GO:0044774]; positive regulation of apoptotic process [GO:0043065]; …	ATP binding [GO:0005524]; chromatin binding [GO:0003682]; DNA binding [GO:0003677]; DNA binding, bending [GO:0008301]; DNA-dependent ATPase activity [GO:0008094]; DNA topoisomerase type II (ATP-hydrolyzing) activity [GO:0003918]; drug binding [GO:0008144]; enzyme binding [GO:0019899]; histone deacetylase binding [GO:0042826]; magnesium ion binding [GO:0000287]; protein C-terminus binding [GO:0008…
Q9UIG0	-0.655254	0.675365	Q9UIG0	BAZ1B	Tyrosine-protein kinase BAZ1B (EC 2.7.10.2) (Bromodomain adjacent to zinc finger domain protein 1B) (Williams syndrome transcription factor) (Williams-Beuren syndrome chromosomal region 10 protein) (Williams-Beuren syndrome chromosomal region 9 protein) (hWALp2)	1483	n	condensed chromosome [GO:0000793]; nuclear body [GO:0016604]; nucleoplasm [GO:0005654]; pericentric heterochromatin [GO:0005721]	cellular response to DNA damage stimulus [GO:0006974]; chromatin assembly or disassembly [GO:0006333]; chromatin-mediated maintenance of transcription [GO:0048096]; double-strand break repair [GO:0006302]; heart morphogenesis [GO:0003007]; histone phosphorylation [GO:0016572]; positive regulation of gene expression, epigenetic [GO:0045815]; regulation of transcription, DNA-templated [GO:0006355];…	ATP binding [GO:0005524]; chromatin binding [GO:0003682]; histone kinase activity [GO:0035173]; lysine-acetylated histone binding [GO:0070577]; non-membrane spanning protein tyrosine kinase activity [GO:0004715]; protein tyrosine kinase activity [GO:0004713]; vitamin D receptor activator activity [GO:0071884]; zinc ion binding [GO:0008270]
Q9H211	0.0324713	0.000336823	Q9H211	CDT1	DNA replication factor Cdt1 (Double parked homolog) (DUP)	546	n	condensed chromosome kinetochore [GO:0000777]; cytoplasm [GO:0005737]; cytosol [GO:0005829]; nuclear body [GO:0016604]; nucleoplasm [GO:0005654]; nucleus [GO:0005634]	attachment of mitotic spindle microtubules to kinetochore [GO:0051315]; cell division [GO:0051301]; chromosome segregation [GO:0007059]; deactivation of mitotic spindle assembly checkpoint [GO:1902426]; DNA replication checkpoint [GO:0000076]; DNA replication preinitiation complex assembly [GO:0071163]; G1/S transition of mitotic cell cycle [GO:0000082]; kinetochore organization [GO:0051383]; mit…	chromatin binding [GO:0003682]; DNA binding [GO:0003677]
Q8WYP5	0.159631	0.0873489	Q8WYP5	AHCTF1	Protein ELYS (Embryonic large molecule derived from yolk sac) (Protein MEL-28) (Putative AT-hook-containing transcription factor 1)	2266	n	condensed chromosome kinetochore [GO:0000777]; cytosol [GO:0005829]; extracellular exosome [GO:0070062]; nuclear matrix [GO:0016363]; nuclear membrane [GO:0031965]; nuclear periphery [GO:0034399]; nuclear pore [GO:0005643]; nucleoplasm [GO:0005654]; nucleus [GO:0005634]	cytokinesis [GO:0000910]; mRNA transport [GO:0051028]; nuclear pore complex assembly [GO:0051292]; protein transport [GO:0015031]; sister chromatid cohesion [GO:0007062]	DNA binding [GO:0003677]; transcription factor activity, sequence-specific DNA binding [GO:0003700]
Q8NFH3	1.0353	0.877299	Q8NFH3	NUP43	Nucleoporin Nup43 (Nup107-160 subcomplex subunit Nup43) (p42)	380	n	condensed chromosome kinetochore [GO:0000777]; cytosol [GO:0005829]; host cell [GO:0043657]; nuclear envelope [GO:0005635]; nuclear pore outer ring [GO:0031080]	cell division [GO:0051301]; intracellular transport of virus [GO:0075733]; mitotic nuclear envelope disassembly [GO:0007077]; mRNA export from nucleus [GO:0006406]; protein sumoylation [GO:0016925]; regulation of cellular response to heat [GO:1900034]; regulation of gene silencing by miRNA [GO:0060964]; regulation of glucose transport [GO:0010827]; sister chromatid cohesion [GO:0007062]; tRNA exp…
Q8NFH4;F8VTY2	-1.22067	1.28653	Q8NFH4	NUP37	Nucleoporin Nup37 (p37) (Nup107-160 subcomplex subunit Nup37)	326	n	condensed chromosome kinetochore [GO:0000777]; cytosol [GO:0005829]; host cell [GO:0043657]; nuclear envelope [GO:0005635]; nuclear pore outer ring [GO:0031080]; nucleoplasm [GO:0005654]; nucleus [GO:0005634]	cell division [GO:0051301]; intracellular transport of virus [GO:0075733]; mitotic nuclear envelope disassembly [GO:0007077]; mRNA export from nucleus [GO:0006406]; protein sumoylation [GO:0016925]; regulation of cellular response to heat [GO:1900034]; regulation of gene silencing by miRNA [GO:0060964]; regulation of glucose transport [GO:0010827]; sister chromatid cohesion [GO:0007062]; tRNA exp…
P18754;C9JW69;C9JRH2;C9JMJ4;C9J3R0;C9JQZ4	-0.0744882	0.00539765	P18754	RCC1	Regulator of chromosome condensation (Cell cycle regulatory protein) (Chromosome condensation protein 1)	421	n	condensed nuclear chromosome [GO:0000794]; cytoplasm [GO:0005737]; nuclear chromatin [GO:0000790]; nuclear membrane [GO:0031965]; nucleoplasm [GO:0005654]; nucleus [GO:0005634]; protein complex [GO:0043234]	cell division [GO:0051301]; chromosome segregation [GO:0007059]; G1/S transition of mitotic cell cycle [GO:0000082]; mitotic spindle organization [GO:0007052]; protein heterotetramerization [GO:0051290]; regulation of mitotic nuclear division [GO:0007088]; spindle assembly [GO:0051225]; viral process [GO:0016032]	chromatin binding [GO:0003682]; histone binding [GO:0042393]; nucleosomal DNA binding [GO:0031492]; nucleosome binding [GO:0031491]; protein heterodimerization activity [GO:0046982]; Ran GTPase binding [GO:0008536]; Ran guanyl-nucleotide exchange factor activity [GO:0005087]; sulfate binding [GO:0043199]
Q9BYG3;C9J808;C9J6C5;H7BZL0	-0.495227	0.504679	Q9BYG3	NIFK	MKI67 FHA domain-interacting nucleolar phosphoprotein (Nucleolar phosphoprotein Nopp34) (Nucleolar protein interacting with the FHA domain of pKI-67) (hNIFK)	293	n	condensed nuclear chromosome [GO:0000794]; cytoplasm [GO:0005737]; nucleolus [GO:0005730]; nucleoplasm [GO:0005654]	negative regulation of phosphatase activity [GO:0010923]; protein complex assembly [GO:0006461]; rRNA metabolic process [GO:0016072]; rRNA transcription [GO:0009303]	RNA binding [GO:0003723]
Q15050	-0.742481	0.504679	Q15050	RRS1	Ribosome biogenesis regulatory protein homolog	365	n	condensed nuclear chromosome [GO:0000794]; endoplasmic reticulum [GO:0005783]; fibrillar center [GO:0001650]; nucleolus [GO:0005730]; nucleus [GO:0005634]; preribosome, large subunit precursor [GO:0030687]	endonucleolytic cleavage in ITS1 to separate SSU-rRNA from 5.8S rRNA and LSU-rRNA from tricistronic rRNA transcript (SSU-rRNA, 5.8S rRNA, LSU-rRNA) [GO:0000447]; hematopoietic progenitor cell differentiation [GO:0002244]; mitotic metaphase plate congression [GO:0007080]; protein localization to nucleolus [GO:1902570]; regulation of signal transduction by p53 class mediator [GO:1901796]; ribosomal…	5S rRNA binding [GO:0008097]; RNA binding [GO:0003723]
P35659;B4DFG0;D6RDA2;D6R9L5;H0Y993;H0Y8X0	-1.56229	1.40143	P35659	DEK	Protein DEK	375	n	contractile fiber [GO:0043292]; nucleoplasm [GO:0005654]; nucleus [GO:0005634]	chromatin remodeling [GO:0006338]; covalent chromatin modification [GO:0016569]; positive regulation of gene expression, epigenetic [GO:0045815]; regulation of double-strand break repair [GO:2000779]; regulation of double-strand break repair via nonhomologous end joining [GO:2001032]; regulation of transcription from RNA polymerase II promoter [GO:0006357]; signal transduction [GO:0007165]; trans…	chromatin binding [GO:0003682]; DNA binding [GO:0003677]; histone binding [GO:0042393]; RNA binding [GO:0003723]
K7EKI0;Q92817	0.0235828	0.000336823	K7EKI0	EVPL	Envoplakin	2055	c	cornified envelope [GO:0001533]; cytosol [GO:0005829]; intermediate filament cytoskeleton [GO:0045111]	epidermis development [GO:0008544]	intermediate filament binding [GO:0019215]; structural molecule activity [GO:0005198]
Q8N4Y2	-1.87517	0.0929305	Q8N4Y2	CRACR2B	EF-hand calcium-binding domain-containing protein 4A (Calcium release-activated calcium channel regulator 2B) (CRAC channel regulator 2B) (Calcium release-activated channel regulator 2B)	399	c	cytoplasm [GO:0005737]	cellular protein localization [GO:0034613]; regulation of store-operated calcium entry [GO:2001256]; store-operated calcium entry [GO:0002115]	calcium ion binding [GO:0005509]
F6S7Q7;U3KQG0;Q9BW92	0.347834	0.183681	F6S7Q7	TARS2	Threonine--tRNA ligase, mitochondrial	443	c	cytoplasm [GO:0005737]	threonyl-tRNA aminoacylation [GO:0006435]	ATP binding [GO:0005524]; threonine-tRNA ligase activity [GO:0004829]
P12270;Q5SWX9	1.20308	1.19883	P12270	TPR	Nucleoprotein TPR (Megator) (NPC-associated intranuclear protein) (Translocated promoter region protein)	2363	c	cytoplasm [GO:0005737]; cytoplasmic dynein complex [GO:0005868]; extrinsic component of membrane [GO:0019898]; host cell [GO:0043657]; kinetochore [GO:0000776]; mitotic spindle [GO:0072686]; nuclear envelope [GO:0005635]; nuclear inclusion body [GO:0042405]; nuclear membrane [GO:0031965]; nuclear periphery [GO:0034399]; nuclear pore [GO:0005643]; nuclear pore nuclear basket [GO:0044615]; nucleopl…	cell division [GO:0051301]; cellular response to heat [GO:0034605]; cellular response to interferon-alpha [GO:0035457]; intracellular transport of virus [GO:0075733]; MAPK import into nucleus [GO:0000189]; mitotic nuclear envelope disassembly [GO:0007077]; mitotic spindle assembly checkpoint [GO:0007094]; mRNA export from nucleus [GO:0006406]; mRNA export from nucleus in response to heat stress […	chromatin binding [GO:0003682]; dynein complex binding [GO:0070840]; heat shock protein binding [GO:0031072]; mitogen-activated protein kinase binding [GO:0051019]; mRNA binding [GO:0003729]; nucleocytoplasmic transporter activity [GO:0005487]; protein homodimerization activity [GO:0042803]; RNA binding [GO:0003723]; tubulin binding [GO:0015631]
Q13868;A3KFL1;A3KFL5;A3KFL2	0.0329399	0.00366528	Q13868	EXOSC2	Exosome complex component RRP4 (Exosome component 2) (Ribosomal RNA-processing protein 4)	293	c	cytoplasm [GO:0005737]; cytoplasmic exosome (RNase complex) [GO:0000177]; cytosol [GO:0005829]; exosome (RNase complex) [GO:0000178]; nuclear exosome (RNase complex) [GO:0000176]; nucleolus [GO:0005730]; nucleoplasm [GO:0005654]; nucleus [GO:0005634]	CUT catabolic process [GO:0071034]; exonucleolytic nuclear-transcribed mRNA catabolic process involved in deadenylation-dependent decay [GO:0043928]; exonucleolytic trimming to generate mature 3'-end of 5.8S rRNA from tricistronic rRNA transcript (SSU-rRNA, 5.8S rRNA, LSU-rRNA) [GO:0000467]; nuclear polyadenylation-dependent rRNA catabolic process [GO:0071035]; nuclear polyadenylation-dependent t…	3'-5'-exoribonuclease activity [GO:0000175]; 7S RNA binding [GO:0008312]
Q562R1	-1.26057	0.492889	Q562R1	ACTBL2	Beta-actin-like protein 2 (Kappa-actin)	376	c	cytoplasm [GO:0005737]; cytoskeleton [GO:0005856]; extracellular exosome [GO:0070062]; extracellular space [GO:0005615]		ATP binding [GO:0005524]
P61254;J3KTJ8;J3QRI7;J3QQQ9;J3QQV1;E5RIT6;J3QRC4;Q9UNX3;E5RHH1;J3KS10;J3KSS0;H7C1F9;Q2PPJ7	0.806684	0.628276	P61254	RPL26	60S ribosomal protein L26 (Large ribosomal subunit protein uL24)	145	c	cytoplasm [GO:0005737]; cytosol [GO:0005829]; cytosolic large ribosomal subunit [GO:0022625]; cytosolic ribosome [GO:0022626]; extracellular exosome [GO:0070062]; membrane [GO:0016020]; nucleolus [GO:0005730]; nucleoplasm [GO:0005654]; ribonucleoprotein complex [GO:1990904]	cellular response to gamma radiation [GO:0071480]; cellular response to UV [GO:0034644]; cytoplasmic translation [GO:0002181]; DNA damage response, signal transduction by p53 class mediator resulting in cell cycle arrest [GO:0006977]; nuclear-transcribed mRNA catabolic process, nonsense-mediated decay [GO:0000184]; positive regulation of DNA damage response, signal transduction by p53 class media…	mRNA 5'-UTR binding [GO:0048027]; RNA binding [GO:0003723]; structural constituent of ribosome [GO:0003735]
P62913;Q5VVC9;Q5VVC8	0.274716	0.266977	P62913	RPL11	60S ribosomal protein L11 (CLL-associated antigen KW-12) (Large ribosomal subunit protein uL5)	178	c	cytoplasm [GO:0005737]; cytosol [GO:0005829]; cytosolic large ribosomal subunit [GO:0022625]; extracellular exosome [GO:0070062]; extracellular matrix [GO:0031012]; membrane [GO:0016020]; nucleolus [GO:0005730]; nucleoplasm [GO:0005654]; protein complex [GO:0043234]	negative regulation of proteasomal ubiquitin-dependent protein catabolic process [GO:0032435]; negative regulation of protein neddylation [GO:2000435]; negative regulation of protein ubiquitination involved in ubiquitin-dependent protein catabolic process [GO:2000059]; negative regulation of ubiquitin protein ligase activity [GO:1904667]; nuclear-transcribed mRNA catabolic process, nonsense-media…	5S rRNA binding [GO:0008097]; RNA binding [GO:0003723]; structural constituent of ribosome [GO:0003735]; ubiquitin ligase inhibitor activity [GO:1990948]; ubiquitin protein ligase binding [GO:0031625]
P18124;A8MUD9;C9JIJ5;C9JZ88	0.450177	0.390852	P18124	RPL7	60S ribosomal protein L7 (Large ribosomal subunit protein uL30)	248	c	cytoplasm [GO:0005737]; cytosol [GO:0005829]; cytosolic large ribosomal subunit [GO:0022625]; extracellular exosome [GO:0070062]; focal adhesion [GO:0005925]; intracellular ribonucleoprotein complex [GO:0030529]; membrane [GO:0016020]; nucleolus [GO:0005730]; nucleus [GO:0005634]	cytoplasmic translation [GO:0002181]; maturation of LSU-rRNA from tricistronic rRNA transcript (SSU-rRNA, 5.8S rRNA, LSU-rRNA) [GO:0000463]; nuclear-transcribed mRNA catabolic process, nonsense-mediated decay [GO:0000184]; ribosomal large subunit biogenesis [GO:0042273]; rRNA processing [GO:0006364]; SRP-dependent cotranslational protein targeting to membrane [GO:0006614]; translation [GO:0006412…	DNA binding [GO:0003677]; mRNA binding [GO:0003729]; protein homodimerization activity [GO:0042803]; RNA binding [GO:0003723]; structural constituent of ribosome [GO:0003735]
P36578;H3BM89;H3BU31;H3BTP7	-0.279824	0.134703	P36578	RPL4	60S ribosomal protein L4 (60S ribosomal protein L1) (Large ribosomal subunit protein uL4)	427	c	cytoplasm [GO:0005737]; cytosol [GO:0005829]; cytosolic large ribosomal subunit [GO:0022625]; extracellular exosome [GO:0070062]; focal adhesion [GO:0005925]; intracellular ribonucleoprotein complex [GO:0030529]; membrane [GO:0016020]; nucleolus [GO:0005730]; nucleus [GO:0005634]; rough endoplasmic reticulum [GO:0005791]	cytoplasmic translation [GO:0002181]; nuclear-transcribed mRNA catabolic process, nonsense-mediated decay [GO:0000184]; rRNA processing [GO:0006364]; SRP-dependent cotranslational protein targeting to membrane [GO:0006614]; translation [GO:0006412]; translational initiation [GO:0006413]; viral transcription [GO:0019083]	RNA binding [GO:0003723]; structural constituent of ribosome [GO:0003735]
P46777;Q5T7N0	0.0420359	0.00539765	P46777	RPL5	60S ribosomal protein L5 (Large ribosomal subunit protein uL18)	297	c	cytoplasm [GO:0005737]; cytosol [GO:0005829]; cytosolic large ribosomal subunit [GO:0022625]; extracellular exosome [GO:0070062]; focal adhesion [GO:0005925]; intracellular ribonucleoprotein complex [GO:0030529]; membrane [GO:0016020]; nucleolus [GO:0005730]; nucleoplasm [GO:0005654]; nucleus [GO:0005634]; protein complex [GO:0043234]	negative regulation of protein neddylation [GO:2000435]; negative regulation of protein ubiquitination involved in ubiquitin-dependent protein catabolic process [GO:2000059]; negative regulation of ubiquitin protein ligase activity [GO:1904667]; nuclear-transcribed mRNA catabolic process, nonsense-mediated decay [GO:0000184]; positive regulation of gene expression [GO:0010628]; positive regulatio…	5S rRNA binding [GO:0008097]; mRNA 3'-UTR binding [GO:0003730]; mRNA 5'-UTR binding [GO:0048027]; RNA binding [GO:0003723]; structural constituent of ribosome [GO:0003735]; ubiquitin ligase inhibitor activity [GO:1990948]; ubiquitin protein ligase binding [GO:0031625]
P62424;Q5T8U3;Q5T8U2	-0.747	0.742432	P62424	RPL7A	60S ribosomal protein L7a (Large ribosomal subunit protein eL8) (PLA-X polypeptide) (Surfeit locus protein 3)	266	c	cytoplasm [GO:0005737]; cytosol [GO:0005829]; cytosolic large ribosomal subunit [GO:0022625]; extracellular exosome [GO:0070062]; focal adhesion [GO:0005925]; membrane [GO:0016020]; nucleolus [GO:0005730]; nucleus [GO:0005634]; polysomal ribosome [GO:0042788]	maturation of LSU-rRNA [GO:0000470]; nuclear-transcribed mRNA catabolic process, nonsense-mediated decay [GO:0000184]; rRNA processing [GO:0006364]; SRP-dependent cotranslational protein targeting to membrane [GO:0006614]; translation [GO:0006412]; translational initiation [GO:0006413]; viral transcription [GO:0019083]	cadherin binding [GO:0045296]; RNA binding [GO:0003723]; structural constituent of ribosome [GO:0003735]
P39023;G5E9G0;B5MCW2;H7C3M2;H7C422;F8WCR1;Q92901	-2.07939	1.26274	P39023	RPL3	60S ribosomal protein L3 (HIV-1 TAR RNA-binding protein B) (TARBP-B) (Large ribosomal subunit protein uL3)	403	c	cytoplasm [GO:0005737]; cytosol [GO:0005829]; cytosolic large ribosomal subunit [GO:0022625]; extracellular exosome [GO:0070062]; focal adhesion [GO:0005925]; nucleolus [GO:0005730]; nucleus [GO:0005634]; protein complex [GO:0043234]	cellular response to interleukin-4 [GO:0071353]; nuclear-transcribed mRNA catabolic process, nonsense-mediated decay [GO:0000184]; ribosomal large subunit assembly [GO:0000027]; rRNA processing [GO:0006364]; SRP-dependent cotranslational protein targeting to membrane [GO:0006614]; translation [GO:0006412]; translational initiation [GO:0006413]; viral transcription [GO:0019083]	5S rRNA binding [GO:0008097]; RNA binding [GO:0003723]; structural constituent of ribosome [GO:0003735]
P23396;E9PL09;F2Z2S8;H0YCJ7;H0YF32;E9PPU1;H0YEU2;E9PQ96;E9PJH4;E9PK82;E9PSF4;E9PQX2;H0YES8;E9PJN9	-0.112016	0.0488706	P23396	RPS3	40S ribosomal protein S3 (EC 4.2.99.18) (Small ribosomal subunit protein uS3)	243	c	cytoplasm [GO:0005737]; cytosol [GO:0005829]; cytosolic small ribosomal subunit [GO:0022627]; endoplasmic reticulum [GO:0005783]; extracellular exosome [GO:0070062]; extracellular matrix [GO:0031012]; focal adhesion [GO:0005925]; intracellular ribonucleoprotein complex [GO:0030529]; membrane [GO:0016020]; mitochondrial inner membrane [GO:0005743]; mitochondrial matrix [GO:0005759]; mitotic spindl…	apoptotic process [GO:0006915]; cell division [GO:0051301]; cellular response to DNA damage stimulus [GO:0006974]; cellular response to hydrogen peroxide [GO:0070301]; cellular response to tumor necrosis factor [GO:0071356]; chromosome segregation [GO:0007059]; cytoplasmic translation [GO:0002181]; DNA damage response, detection of DNA damage [GO:0042769]; DNA repair [GO:0006281]; negative regula…	damaged DNA binding [GO:0003684]; DNA-(apurinic or apyrimidinic site) lyase activity [GO:0003906]; DNA binding [GO:0003677]; endodeoxyribonuclease activity [GO:0004520]; enzyme binding [GO:0019899]; Hsp70 protein binding [GO:0030544]; Hsp90 protein binding [GO:0051879]; iron-sulfur cluster binding [GO:0051536]; kinase binding [GO:0019900]; microtubule binding [GO:0008017]; mRNA binding [GO:000372…
P61247;D6RG13;D6RAT0;D6RB09;E9PFI5;H0Y9Y4;D6R9B6;H0Y8L7;D6RAS7;D6RED7;D6RGE0;D6RI02	-0.128336	0.065434	P61247	RPS3A	40S ribosomal protein S3a (Small ribosomal subunit protein eS1) (v-fos transformation effector protein) (Fte-1)	264	c	cytoplasm [GO:0005737]; cytosol [GO:0005829]; cytosolic small ribosomal subunit [GO:0022627]; endoplasmic reticulum [GO:0005783]; extracellular exosome [GO:0070062]; extracellular matrix [GO:0031012]; focal adhesion [GO:0005925]; intracellular ribonucleoprotein complex [GO:0030529]; nucleolus [GO:0005730]; nucleoplasm [GO:0005654]; nucleus [GO:0005634]	cell differentiation [GO:0030154]; cytoplasmic translation [GO:0002181]; negative regulation of apoptotic process [GO:0043066]; nuclear-transcribed mRNA catabolic process, nonsense-mediated decay [GO:0000184]; rRNA processing [GO:0006364]; SRP-dependent cotranslational protein targeting to membrane [GO:0006614]; translation [GO:0006412]; translational initiation [GO:0006413]; viral transcription …	mRNA 5'-UTR binding [GO:0048027]; RNA binding [GO:0003723]; structural constituent of ribosome [GO:0003735]
P62280;M0QZC5;M0R1H6;M0R1H5	-0.291369	0.259792	P62280	RPS11	40S ribosomal protein S11 (Small ribosomal subunit protein uS17)	158	c	cytoplasm [GO:0005737]; cytosol [GO:0005829]; cytosolic small ribosomal subunit [GO:0022627]; extracellular exosome [GO:0070062]; extracellular matrix [GO:0031012]; focal adhesion [GO:0005925]; membrane [GO:0016020]; nucleolus [GO:0005730]; nucleoplasm [GO:0005654]; ribosome [GO:0005840]	nuclear-transcribed mRNA catabolic process, nonsense-mediated decay [GO:0000184]; osteoblast differentiation [GO:0001649]; rRNA processing [GO:0006364]; SRP-dependent cotranslational protein targeting to membrane [GO:0006614]; translation [GO:0006412]; translational initiation [GO:0006413]; viral transcription [GO:0019083]	RNA binding [GO:0003723]; rRNA binding [GO:0019843]; structural constituent of ribosome [GO:0003735]
P04406;E7EUT5	0.459049	0.504679	P04406	GAPDH	Glyceraldehyde-3-phosphate dehydrogenase (GAPDH) (EC 1.2.1.12) (Peptidyl-cysteine S-nitrosylase GAPDH) (EC 2.6.99.-)	335	c	cytoplasm [GO:0005737]; cytosol [GO:0005829]; extracellular exosome [GO:0070062]; extracellular matrix [GO:0031012]; GAIT complex [GO:0097452]; intracellular membrane-bounded organelle [GO:0043231]; intracellular ribonucleoprotein complex [GO:0030529]; lipid particle [GO:0005811]; membrane [GO:0016020]; microtubule cytoskeleton [GO:0015630]; nuclear membrane [GO:0031965]; nucleus [GO:0005634]; pe…	antimicrobial humoral immune response mediated by antimicrobial peptide [GO:0061844]; canonical glycolysis [GO:0061621]; cellular response to interferon-gamma [GO:0071346]; defense response to fungus [GO:0050832]; gluconeogenesis [GO:0006094]; killing by host of symbiont cells [GO:0051873]; killing of cells of other organism [GO:0031640]; microtubule cytoskeleton organization [GO:0000226]; negati…	aspartic-type endopeptidase inhibitor activity [GO:0019828]; disordered domain specific binding [GO:0097718]; glyceraldehyde-3-phosphate dehydrogenase (NAD+) (phosphorylating) activity [GO:0004365]; identical protein binding [GO:0042802]; microtubule binding [GO:0008017]; NAD binding [GO:0051287]; NADP binding [GO:0050661]; peptidyl-cysteine S-nitrosylase activity [GO:0035605]
Q15365;F8VTZ0	-0.427327	0.504752	Q15365	PCBP1	Poly(rC)-binding protein 1 (Alpha-CP1) (Heterogeneous nuclear ribonucleoprotein E1) (hnRNP E1) (Nucleic acid-binding protein SUB2.3)	356	c	cytoplasm [GO:0005737]; cytosol [GO:0005829]; extracellular exosome [GO:0070062]; membrane [GO:0016020]; nuclear speck [GO:0016607]; nucleoplasm [GO:0005654]; P-body [GO:0000932]	mRNA splicing, via spliceosome [GO:0000398]; positive regulation of transcription from RNA polymerase II promoter [GO:0045944]; RNA metabolic process [GO:0016070]; viral RNA genome replication [GO:0039694]	cadherin binding [GO:0045296]; mRNA binding [GO:0003729]; RNA binding [GO:0003723]; RNA polymerase II transcription factor activity, sequence-specific DNA binding [GO:0000981]; sequence-specific single stranded DNA binding [GO:0098847]; single-stranded DNA binding [GO:0003697]
P56537;B7ZBH1;F8WD20;A0A0B4J1Y7;A0A0U1RQV5;F8WDS6	1.29249	1.29939	P56537	EIF6	Eukaryotic translation initiation factor 6 (eIF-6) (B(2)GCN homolog) (B4 integrin interactor) (CAB) (p27(BBP))	245	c	cytoplasm [GO:0005737]; cytosol [GO:0005829]; extracellular exosome [GO:0070062]; nucleolus [GO:0005730]; nucleoplasm [GO:0005654]; nucleus [GO:0005634]; preribosome, large subunit precursor [GO:0030687]	assembly of large subunit precursor of preribosome [GO:1902626]; gene silencing by miRNA [GO:0035195]; maturation of 5.8S rRNA [GO:0000460]; maturation of LSU-rRNA [GO:0000470]; mature ribosome assembly [GO:0042256]; miRNA mediated inhibition of translation [GO:0035278]; positive regulation of translation [GO:0045727]; regulation of fatty acid biosynthetic process [GO:0042304]; regulation of glyc…	ribosomal large subunit binding [GO:0043023]; ribosome binding [GO:0043022]; translation initiation factor activity [GO:0003743]
Q9BZE4;Q5T3R7	0.0738992	0.0198402	Q9BZE4	GTPBP4	Nucleolar GTP-binding protein 1 (Chronic renal failure gene protein) (GTP-binding protein NGB)	634	c	cytoplasm [GO:0005737]; cytosol [GO:0005829]; Golgi apparatus [GO:0005794]; membrane [GO:0016020]; nuclear membrane [GO:0031965]; nucleolus [GO:0005730]; nucleus [GO:0005634]; perinuclear region of cytoplasm [GO:0048471]	negative regulation of cell-cell adhesion [GO:0022408]; negative regulation of cell migration [GO:0030336]; negative regulation of cell proliferation [GO:0008285]; negative regulation of collagen binding [GO:0033342]; negative regulation of DNA replication [GO:0008156]; negative regulation of protein ubiquitination [GO:0031397]; osteoblast differentiation [GO:0001649]; protein stabilization [GO:0…	GTPase activity [GO:0003924]; GTP binding [GO:0005525]; RNA binding [GO:0003723]
Q15717;M0QZR9;M0R055;B1AM48;B1APY9;B1APY8;A0A0A0MRX1;A0A0R4J2E6;Q12926;P26378	-0.459737	0.38913	Q15717	ELAVL1	ELAV-like protein 1 (Hu-antigen R) (HuR)	326	c	cytoplasm [GO:0005737]; cytosol [GO:0005829]; membrane [GO:0016020]; nucleoplasm [GO:0005654]; nucleus [GO:0005634]; ribonucleoprotein complex [GO:1990904]	3'-UTR-mediated mRNA stabilization [GO:0070935]; mRNA splicing, via spliceosome [GO:0000398]; mRNA stabilization [GO:0048255]; multicellular organism development [GO:0007275]; negative regulation of gene silencing by miRNA [GO:0060965]; positive regulation of translation [GO:0045727]; regulation of mRNA stability [GO:0043488]; regulation of stem cell population maintenance [GO:2000036]	AU-rich element binding [GO:0017091]; double-stranded RNA binding [GO:0003725]; mRNA 3'-UTR AU-rich region binding [GO:0035925]; mRNA 3'-UTR binding [GO:0003730]; mRNA binding [GO:0003729]; protein homodimerization activity [GO:0042803]; protein kinase binding [GO:0019901]; RNA binding [GO:0003723]
P11498;E9PRE7;E9PS68	7.0766	2.41551	P11498	PC	Pyruvate carboxylase, mitochondrial (EC 6.4.1.1) (Pyruvic carboxylase) (PCB)	1178	c	cytoplasm [GO:0005737]; cytosol [GO:0005829]; mitochondrial matrix [GO:0005759]; mitochondrion [GO:0005739]	biotin metabolic process [GO:0006768]; gluconeogenesis [GO:0006094]; lipid metabolic process [GO:0006629]; negative regulation of gene expression [GO:0010629]; positive regulation by host of viral process [GO:0044794]; positive regulation by host of viral release from host cell [GO:0044791]; pyruvate metabolic process [GO:0006090]; viral RNA genome packaging [GO:0019074]	ATP binding [GO:0005524]; biotin binding [GO:0009374]; biotin carboxylase activity [GO:0004075]; metal ion binding [GO:0046872]; pyruvate carboxylase activity [GO:0004736]
P24928;A0A087WWE2	0.58958	0.668405	P24928	POLR2A	DNA-directed RNA polymerase II subunit RPB1 (RNA polymerase II subunit B1) (EC 2.7.7.6) (DNA-directed RNA polymerase II subunit A) (DNA-directed RNA polymerase III largest subunit) (RNA-directed RNA polymerase II subunit RPB1) (EC 2.7.7.48)	1970	c	cytoplasm [GO:0005737]; DNA-directed RNA polymerase II, core complex [GO:0005665]; nucleoplasm [GO:0005654]; nucleus [GO:0005634]	7-methylguanosine mRNA capping [GO:0006370]; DNA-templated transcription, termination [GO:0006353]; fibroblast growth factor receptor signaling pathway [GO:0008543]; mRNA splicing, via spliceosome [GO:0000398]; positive regulation of RNA splicing [GO:0033120]; positive regulation of viral transcription [GO:0050434]; regulation of gene silencing by miRNA [GO:0060964]; regulation of transcription, …	DNA binding [GO:0003677]; DNA-directed 5'-3' RNA polymerase activity [GO:0003899]; metal ion binding [GO:0046872]; RNA binding [GO:0003723]; RNA-directed 5'-3' RNA polymerase activity [GO:0003968]; ubiquitin protein ligase binding [GO:0031625]
O43147	1.81639	0.141865	O43147	SGSM2	Small G protein signaling modulator 2 (RUN and TBC1 domain-containing protein 1)	1006	c	cytoplasm [GO:0005737]; endomembrane system [GO:0012505]; melanosome [GO:0042470]	activation of GTPase activity [GO:0090630]; intracellular protein transport [GO:0006886]; late endosome to Golgi transport [GO:0034499]; positive regulation of GTPase activity [GO:0043547]; regulation of vesicle fusion [GO:0031338]	GTPase activator activity [GO:0005096]; Rab GTPase binding [GO:0017137]
P50402;Q5HY57	-0.000335143	0.000336823	P50402	EMD	Emerin	254	c	cytoplasm [GO:0005737]; endoplasmic reticulum [GO:0005783]; integral component of membrane [GO:0016021]; membrane [GO:0016020]; microtubule [GO:0005874]; nuclear envelope [GO:0005635]; nuclear inner membrane [GO:0005637]; nuclear membrane [GO:0031965]; nuclear outer membrane [GO:0005640]; nucleoplasm [GO:0005654]	cellular response to growth factor stimulus [GO:0071363]; mitotic nuclear envelope disassembly [GO:0007077]; mitotic nuclear envelope reassembly [GO:0007084]; muscle contraction [GO:0006936]; muscle organ development [GO:0007517]; negative regulation of catenin import into nucleus [GO:0035414]; negative regulation of fibroblast proliferation [GO:0048147]; positive regulation of protein export fro…	actin binding [GO:0003779]; beta-tubulin binding [GO:0048487]; cadherin binding [GO:0045296]
P38646;D6RA73;D6RJI2;H0YBG6	-0.629228	0.62338	P38646	HSPA9	Stress-70 protein, mitochondrial (75 kDa glucose-regulated protein) (GRP-75) (Heat shock 70 kDa protein 9) (Mortalin) (MOT) (Peptide-binding protein 74) (PBP74)	679	c	cytoplasm [GO:0005737]; extracellular exosome [GO:0070062]; extracellular matrix [GO:0031012]; focal adhesion [GO:0005925]; mitochondrial nucleoid [GO:0042645]; mitochondrion [GO:0005739]; myelin sheath [GO:0043209]; nucleolus [GO:0005730]	erythrocyte differentiation [GO:0030218]; negative regulation of apoptotic process [GO:0043066]; negative regulation of erythrocyte differentiation [GO:0045647]; negative regulation of hematopoietic stem cell differentiation [GO:1902037]; protein export from nucleus [GO:0006611]; protein folding [GO:0006457]	ATP binding [GO:0005524]; RNA binding [GO:0003723]; ubiquitin protein ligase binding [GO:0031625]; unfolded protein binding [GO:0051082]
Q5VTE0;P68104;A0A087WVQ9;A0A087WV01;Q05639;A6PW80;Q5JR01	0.0397223	0.0058878	Q5VTE0	EEF1A1P5	Putative elongation factor 1-alpha-like 3 (EF-1-alpha-like 3) (Eukaryotic elongation factor 1 A-like 3) (eEF1A-like 3) (Eukaryotic translation elongation factor 1 alpha-1 pseudogene 5)	462	c	cytoplasm [GO:0005737]; extracellular exosome [GO:0070062]; extracellular space [GO:0005615]; nucleus [GO:0005634]		GTPase activity [GO:0003924]; GTP binding [GO:0005525]; translation elongation factor activity [GO:0003746]
Q92766;C9JE09;C9JPJ6;A0A087X055;C9JU34	3.31825	1.71331	Q92766	RREB1	Ras-responsive element-binding protein 1 (RREB-1) (Finger protein in nuclear bodies) (Raf-responsive zinc finger protein LZ321) (Zinc finger motif enhancer-binding protein 1) (Zep-1)	1687	c	cytoplasm [GO:0005737]; extracellular exosome [GO:0070062]; fibrillar center [GO:0001650]; nuclear body [GO:0016604]; nuclear speck [GO:0016607]; nucleus [GO:0005634]	multicellular organism development [GO:0007275]; negative regulation of transcription from RNA polymerase II promoter [GO:0000122]; positive regulation of epithelial cell migration [GO:0010634]; positive regulation of lamellipodium morphogenesis [GO:2000394]; positive regulation of mammary gland epithelial cell proliferation [GO:0033601]; positive regulation of substrate adhesion-dependent cell s…	metal ion binding [GO:0046872]; RNA polymerase II core promoter sequence-specific DNA binding [GO:0000979]; RNA polymerase II regulatory region sequence-specific DNA binding [GO:0000977]; transcriptional activator activity, RNA polymerase II transcription regulatory region sequence-specific binding [GO:0001228]
Q13268;C9JZP6;H0YJG9;H0YJP4	0.16183	0.122472	Q13268	DHRS2	Dehydrogenase/reductase SDR family member 2, mitochondrial (EC 1.1.1.-) (Dicarbonyl reductase HEP27) (Protein D) (Short chain dehydrogenase/reductase family 25C member 1)	280	c	cytoplasm [GO:0005737]; extracellular exosome [GO:0070062]; mitochondrial matrix [GO:0005759]; mitochondrion [GO:0005739]; nuclear envelope [GO:0005635]; nucleus [GO:0005634]	C21-steroid hormone metabolic process [GO:0008207]; cellular response to oxidative stress [GO:0034599]; myeloid dendritic cell differentiation [GO:0043011]; negative regulation of apoptotic process [GO:0043066]; negative regulation of cell proliferation [GO:0008285]; oxidation-reduction process [GO:0055114]; response to toxic substance [GO:0009636]	carbonyl reductase (NADPH) activity [GO:0004090]
B1AK87;B1AK88;P47756;B1AK85	-0.623948	0.755011	B1AK87	CAPZB	Capping protein (Actin filament) muscle Z-line, beta, isoform CRA_a (F-actin-capping protein subunit beta)	260	c	cytoplasm [GO:0005737]; F-actin capping protein complex [GO:0008290]	actin cytoskeleton organization [GO:0030036]; barbed-end actin filament capping [GO:0051016]	actin binding [GO:0003779]
Q8WXF1;X6RDA4	-0.438467	0.390852	Q8WXF1	PSPC1	Paraspeckle component 1 (Paraspeckle protein 1)	523	c	cytoplasm [GO:0005737]; fibrillar center [GO:0001650]; nuclear matrix [GO:0016363]; nuclear speck [GO:0016607]; nucleoplasm [GO:0005654]; nucleus [GO:0005634]; paraspeckles [GO:0042382]	mRNA splicing, via spliceosome [GO:0000398]; negative regulation of transcription, DNA-templated [GO:0045892]; regulation of circadian rhythm [GO:0042752]; regulation of transcription, DNA-templated [GO:0006355]; rhythmic process [GO:0048511]; transcription, DNA-templated [GO:0006351]	core promoter binding [GO:0001047]; RNA binding [GO:0003723]; transcription regulatory region sequence-specific DNA binding [GO:0000976]
P42167;G5E972;H0YJH7;P42166	0.227021	0.143709	P42167	TMPO	Lamina-associated polypeptide 2, isoforms beta/gamma (Thymopoietin, isoforms beta/gamma) (TP beta/gamma) (Thymopoietin-related peptide isoforms beta/gamma) (TPRP isoforms beta/gamma) [Cleaved into: Thymopoietin (TP) (Splenin); Thymopentin (TP5)]	454	c	cytoplasm [GO:0005737]; integral component of membrane [GO:0016021]; membrane [GO:0016020]; nuclear envelope [GO:0005635]; nuclear inner membrane [GO:0005637]; nuclear membrane [GO:0031965]; nucleus [GO:0005634]		DNA binding [GO:0003677]; lamin binding [GO:0005521]
Q13601	5.18868	2.28747	Q13601	KRR1	KRR1 small subunit processome component homolog (HIV-1 Rev-binding protein 2) (KRR-R motif-containing protein 1) (Rev-interacting protein 1) (Rip-1)	381	c	cytoplasm [GO:0005737]; intercellular bridge [GO:0045171]; membrane [GO:0016020]; nucleolus [GO:0005730]; nucleoplasm [GO:0005654]; nucleus [GO:0005634]; small-subunit processome [GO:0032040]	maturation of SSU-rRNA from tricistronic rRNA transcript (SSU-rRNA, 5.8S rRNA, LSU-rRNA) [GO:0000462]; rRNA processing [GO:0006364]	RNA binding [GO:0003723]
Q9P2A4	-0.37717	0.377368	Q9P2A4	ABI3	ABI gene family member 3 (New molecule including SH3) (Nesh)	366	c	cytoplasm [GO:0005737]; intracellular [GO:0005622]; lamellipodium [GO:0030027]; membrane [GO:0016020]	movement of cell or subcellular component [GO:0006928]; regulation of cell migration [GO:0030334]	identical protein binding [GO:0042802]
Q9BQG0;I3L1L3;I3L2H8	3.6419	2.1483	Q9BQG0	MYBBP1A	Myb-binding protein 1A	1328	c	cytoplasm [GO:0005737]; intracellular membrane-bounded organelle [GO:0043231]; membrane [GO:0016020]; NLS-dependent protein nuclear import complex [GO:0042564]; nucleolus [GO:0005730]; nucleoplasm [GO:0005654]; nucleus [GO:0005634]	cellular response to glucose starvation [GO:0042149]; circadian regulation of gene expression [GO:0032922]; intrinsic apoptotic signaling pathway by p53 class mediator [GO:0072332]; negative regulation of transcription, DNA-templated [GO:0045892]; nucleocytoplasmic transport [GO:0006913]; osteoblast differentiation [GO:0001649]; positive regulation of anoikis [GO:2000210]; positive regulation of …	core promoter binding [GO:0001047]; DNA-directed DNA polymerase activity [GO:0003887]; RNA binding [GO:0003723]; sequence-specific DNA binding [GO:0043565]; transcription corepressor activity [GO:0003714]; transcription factor binding [GO:0008134]
Q14966;A0A096LPH6;A0A096LPI0;C9JWN0;A0A096LNR2;A0A096LNX0;A0A096LNS4;A0A096LNQ0;A0A096LPB4;A0A096LPK8	-1.77376	1.45142	Q14966	ZNF638	Zinc finger protein 638 (Cutaneous T-cell lymphoma-associated antigen se33-1) (CTCL-associated antigen se33-1) (Nuclear protein 220) (Zinc finger matrin-like protein)	1978	c	cytoplasm [GO:0005737]; intracellular membrane-bounded organelle [GO:0043231]; nuclear speck [GO:0016607]; nucleoplasm [GO:0005654]	regulation of transcription, DNA-templated [GO:0006355]; RNA splicing [GO:0008380]; transcription, DNA-templated [GO:0006351]	double-stranded DNA binding [GO:0003690]; RNA binding [GO:0003723]; zinc ion binding [GO:0008270]
Q96PK6;A0A0A6YYI9;F8WDX3;A0A0A0MSL8;B8ZZ74	-0.0117876	0.000336823	Q96PK6	RBM14	RNA-binding protein 14 (Paraspeckle protein 2) (PSP2) (RNA-binding motif protein 14) (RRM-containing coactivator activator/modulator) (Synaptotagmin-interacting protein) (SYT-interacting protein)	669	c	cytoplasm [GO:0005737]; intracellular ribonucleoprotein complex [GO:0030529]; mediator complex [GO:0016592]; nuclear speck [GO:0016607]; nucleolus [GO:0005730]; nucleus [GO:0005634]; transcription factor complex [GO:0005667]	centriole assembly [GO:0098534]; DNA recombination [GO:0006310]; DNA repair [GO:0006281]; DNA replication [GO:0006260]; glucocorticoid receptor signaling pathway [GO:0042921]; histone deacetylation [GO:0016575]; intracellular estrogen receptor signaling pathway [GO:0030520]; negative regulation of centriole replication [GO:0046600]; positive regulation of transcription from RNA polymerase II prom…	ligand-dependent nuclear receptor transcription coactivator activity [GO:0030374]; protein binding, bridging [GO:0030674]; RNA binding [GO:0003723]; RNA polymerase II transcription cofactor activity [GO:0001104]
Q12906;K7EKJ9;K7EQR9;K7EJ09;K7ER69;K7ERM6;K7ENK6;K7EM82;K7EKY0;K7EQ75;K7EPG3	6.67838	2.41551	Q12906	ILF3	Interleukin enhancer-binding factor 3 (Double-stranded RNA-binding protein 76) (DRBP76) (M-phase phosphoprotein 4) (MPP4) (Nuclear factor associated with dsRNA) (NFAR) (Nuclear factor of activated T-cells 90 kDa) (NF-AT-90) (Translational control protein 80) (TCP80)	894	c	cytoplasm [GO:0005737]; intracellular ribonucleoprotein complex [GO:0030529]; membrane [GO:0016020]; mitochondrion [GO:0005739]; nucleolus [GO:0005730]; nucleoplasm [GO:0005654]; nucleus [GO:0005634]	defense response to virus [GO:0051607]; negative regulation of transcription, DNA-templated [GO:0045892]; negative regulation of translation [GO:0017148]; negative regulation of viral genome replication [GO:0045071]; positive regulation of transcription, DNA-templated [GO:0045893]; protein phosphorylation [GO:0006468]; transcription, DNA-templated [GO:0006351]	DNA binding [GO:0003677]; double-stranded RNA binding [GO:0003725]; RNA binding [GO:0003723]
Q9H0S4;F5H1N9	2.20819	1.68619	Q9H0S4	DDX47	Probable ATP-dependent RNA helicase DDX47 (EC 3.6.4.13) (DEAD box protein 47)	455	c	cytoplasm [GO:0005737]; membrane [GO:0016020]; nucleolus [GO:0005730]; nucleoplasm [GO:0005654]	extrinsic apoptotic signaling pathway via death domain receptors [GO:0008625]; mRNA processing [GO:0006397]; RNA secondary structure unwinding [GO:0010501]; RNA splicing [GO:0008380]; rRNA processing [GO:0006364]	ATP binding [GO:0005524]; ATP-dependent RNA helicase activity [GO:0004004]; RNA binding [GO:0003723]
Q9NR30	5.3436	2.41551	Q9NR30	DDX21	Nucleolar RNA helicase 2 (EC 3.6.4.13) (DEAD box protein 21) (Gu-alpha) (Nucleolar RNA helicase Gu) (Nucleolar RNA helicase II) (RH II/Gu)	783	c	cytoplasm [GO:0005737]; membrane [GO:0016020]; nucleolus [GO:0005730]; nucleoplasm [GO:0005654]; nucleus [GO:0005634]	osteoblast differentiation [GO:0001649]; positive regulation of gene expression, epigenetic [GO:0045815]; response to exogenous dsRNA [GO:0043330]; response to virus [GO:0009615]; RNA secondary structure unwinding [GO:0010501]; rRNA processing [GO:0006364]; transcription from RNA polymerase II promoter [GO:0006366]	7SK snRNA binding [GO:0097322]; ATP binding [GO:0005524]; ATP-dependent RNA helicase activity [GO:0004004]; double-stranded RNA binding [GO:0003725]; RNA binding [GO:0003723]; rRNA binding [GO:0019843]; snoRNA binding [GO:0030515]
Q15773;F5H0Y3	-0.106441	0.0152726	Q15773	MLF2	Myeloid leukemia factor 2 (Myelodysplasia-myeloid leukemia factor 2)	248	c	cytoplasm [GO:0005737]; membrane [GO:0016020]; nucleus [GO:0005634]	defense response [GO:0006952]
Q9P2P5	-0.576093	0.0152726	Q9P2P5	HECW2	E3 ubiquitin-protein ligase HECW2 (EC 2.3.2.26) (HECT, C2 and WW domain-containing protein 2) (HECT-type E3 ubiquitin transferase HECW2) (NEDD4-like E3 ubiquitin-protein ligase 2)	1572	c	cytoplasm [GO:0005737]; mitotic spindle [GO:0072686]	proteasome-mediated ubiquitin-dependent protein catabolic process [GO:0043161]; protein ubiquitination involved in ubiquitin-dependent protein catabolic process [GO:0042787]; regulation of mitotic metaphase/anaphase transition [GO:0030071]	ubiquitin protein ligase activity [GO:0061630]
P84103;A0A087X2D0	0.572007	0.675365	P84103	SRSF3	Serine/arginine-rich splicing factor 3 (Pre-mRNA-splicing factor SRP20) (Splicing factor, arginine/serine-rich 3)	164	c	cytoplasm [GO:0005737]; nuclear speck [GO:0016607]; nucleoplasm [GO:0005654]	mRNA 3'-end processing [GO:0031124]; mRNA export from nucleus [GO:0006406]; mRNA splicing, via spliceosome [GO:0000398]; regulation of mRNA splicing, via spliceosome [GO:0048024]; RNA export from nucleus [GO:0006405]; termination of RNA polymerase II transcription [GO:0006369]	RNA binding [GO:0003723]; sequence-specific mRNA binding [GO:1990825]
Q9UKD2	-0.873787	0.771649	Q9UKD2	MRTO4	mRNA turnover protein 4 homolog (Ribosome assembly factor MRTO4)	239	c	cytoplasm [GO:0005737]; nucleolus [GO:0005730]	nuclear-transcribed mRNA catabolic process [GO:0000956]; ribosomal large subunit assembly [GO:0000027]; rRNA processing [GO:0006364]	RNA binding [GO:0003723]
E9PIN3;Q9UBU9;B4E227;E9PLA7	0.117506	0.0608128	E9PIN3	NXF1	Nuclear RNA export factor 1 (Fragment)	603	c	cytoplasm [GO:0005737]; nucleoplasm [GO:0005654]	mRNA export from nucleus [GO:0006406]	RNA binding [GO:0003723]
Q49AG3	0.365154	0.315874	Q49AG3	ZBED5	Zinc finger BED domain-containing protein 5 (Transposon-derived Buster1 transposase-like protein)	693	c	cytoplasm [GO:0005737]; nucleoplasm [GO:0005654]		DNA binding [GO:0003677]; metal ion binding [GO:0046872]; RNA polymerase II transcription factor activity, sequence-specific DNA binding [GO:0000981]
Q8N108	-1.58284	1.29939	Q8N108	MIER1	Mesoderm induction early response protein 1 (Early response 1) (Er1) (Mi-er1) (hMi-er1)	512	c	cytoplasm [GO:0005737]; nucleoplasm [GO:0005654]; transcriptional repressor complex [GO:0017053]	positive regulation of chromatin silencing [GO:0031937]; positive regulation of I-kappaB kinase/NF-kappaB signaling [GO:0043123]; transcription, DNA-templated [GO:0006351]	DNA binding [GO:0003677]; signal transducer activity [GO:0004871]
Q2TAY7	0.239275	0.119556	Q2TAY7	SMU1	WD40 repeat-containing protein SMU1 (Smu-1 suppressor of mec-8 and unc-52 protein homolog) [Cleaved into: WD40 repeat-containing protein SMU1, N-terminally processed]	513	c	cytoplasm [GO:0005737]; nucleus [GO:0005634]
Q5RKV6	-1.03882	1.01262	Q5RKV6	EXOSC6	Exosome complex component MTR3 (Exosome component 6) (mRNA transport regulator 3 homolog) (hMtr3) (p11)	272	c	cytoplasmic exosome (RNase complex) [GO:0000177]; cytosol [GO:0005829]; exosome (RNase complex) [GO:0000178]; nuclear exosome (RNase complex) [GO:0000176]; nucleolus [GO:0005730]; nucleoplasm [GO:0005654]	DNA deamination [GO:0045006]; exonucleolytic nuclear-transcribed mRNA catabolic process involved in deadenylation-dependent decay [GO:0043928]; isotype switching [GO:0045190]; nuclear mRNA surveillance [GO:0071028]; nuclear-transcribed mRNA catabolic process, exonucleolytic, 3'-5' [GO:0034427]; polyadenylation-dependent snoRNA 3'-end processing [GO:0071051]; positive regulation of isotype switchi…	RNA binding [GO:0003723]
P68363;P68366;C9JDS9	0.177377	0.118587	P68363	TUBA1B	Tubulin alpha-1B chain (Alpha-tubulin ubiquitous) (Tubulin K-alpha-1) (Tubulin alpha-ubiquitous chain) [Cleaved into: Detyrosinated tubulin alpha-1B chain]	451	c	cytoplasmic microtubule [GO:0005881]; extracellular exosome [GO:0070062]; membrane raft [GO:0045121]; microtubule [GO:0005874]; microtubule cytoskeleton [GO:0015630]; myelin sheath [GO:0043209]	cell division [GO:0051301]; cellular response to interleukin-4 [GO:0071353]; cytoskeleton-dependent intracellular transport [GO:0030705]; microtubule-based process [GO:0007017]; microtubule cytoskeleton organization [GO:0000226]	double-stranded RNA binding [GO:0003725]; GTPase activity [GO:0003924]; GTP binding [GO:0005525]; structural constituent of cytoskeleton [GO:0005200]; structural molecule activity [GO:0005198]; ubiquitin protein ligase binding [GO:0031625]
F5H5D3;Q9BQE3;A0A1W2PQM2;F8VVB9;F8VQQ4;C9J2C0;Q9NY65;F8VRZ4;F8VS66;F8VWV9;F8VX09;C9JEV8;C9JQ00;C9JJQ8;C9JDL2;V9GZ17;A6NHL2;C9K0S6;F8VRK0;F8VXZ7;F8W0F6	0.694228	0.755011	F5H5D3	TUBA1C	Tubulin alpha chain	519	c	cytoplasmic microtubule [GO:0005881]; microtubule cytoskeleton [GO:0015630]	microtubule-based process [GO:0007017]	GTPase activity [GO:0003924]; GTP binding [GO:0005525]; structural constituent of cytoskeleton [GO:0005200]
Q02878;F8VZA3;F8VWR1;F8VU16;F8VZ45;U3KQR5	-2.1128	1.71331	Q02878	RPL6	60S ribosomal protein L6 (Large ribosomal subunit protein eL6) (Neoplasm-related protein C140) (Tax-responsive enhancer element-binding protein 107) (TaxREB107)	288	c	cytoplasmic ribonucleoprotein granule [GO:0036464]; cytosol [GO:0005829]; cytosolic large ribosomal subunit [GO:0022625]; focal adhesion [GO:0005925]; membrane [GO:0016020]; nucleus [GO:0005634]	cytoplasmic translation [GO:0002181]; nuclear-transcribed mRNA catabolic process, nonsense-mediated decay [GO:0000184]; regulation of transcription, DNA-templated [GO:0006355]; ribosomal large subunit assembly [GO:0000027]; rRNA processing [GO:0006364]; SRP-dependent cotranslational protein targeting to membrane [GO:0006614]; translation [GO:0006412]; translational initiation [GO:0006413]; viral …	cadherin binding [GO:0045296]; DNA binding [GO:0003677]; RNA binding [GO:0003723]; structural constituent of ribosome [GO:0003735]
P62701;C9JEH7;Q8TD47;P22090	0.446006	0.390852	P62701	RPS4X	40S ribosomal protein S4, X isoform (SCR10) (Single copy abundant mRNA protein) (Small ribosomal subunit protein eS4)	263	c	cytoplasmic ribonucleoprotein granule [GO:0036464]; cytosol [GO:0005829]; cytosolic small ribosomal subunit [GO:0022627]; extracellular exosome [GO:0070062]; extracellular matrix [GO:0031012]; focal adhesion [GO:0005925]; intracellular ribonucleoprotein complex [GO:0030529]; membrane [GO:0016020]; nucleoplasm [GO:0005654]; polysome [GO:0005844]; ribosome [GO:0005840]; small ribosomal subunit [GO:…	multicellular organism development [GO:0007275]; nuclear-transcribed mRNA catabolic process, nonsense-mediated decay [GO:0000184]; positive regulation of cell proliferation [GO:0008284]; positive regulation of translation [GO:0045727]; rRNA processing [GO:0006364]; SRP-dependent cotranslational protein targeting to membrane [GO:0006614]; translation [GO:0006412]; translational initiation [GO:0006…	RNA binding [GO:0003723]; rRNA binding [GO:0019843]; structural constituent of ribosome [GO:0003735]
P35658;A0A0A0MSW3;H0Y837;H0YF36;E9PKD2;B7ZAV2;H0YDS4	-0.699291	0.794512	P35658	NUP214	Nuclear pore complex protein Nup214 (214 kDa nucleoporin) (Nucleoporin Nup214) (Protein CAN)	2090	c	cytoplasmic side of nuclear pore [GO:1990876]; cytosol [GO:0005829]; focal adhesion [GO:0005925]; host cell [GO:0043657]; intracellular membrane-bounded organelle [GO:0043231]; nuclear pore central transport channel [GO:0044613]; nuclear pore nuclear basket [GO:0044615]; nucleoplasm [GO:0005654]; nucleus [GO:0005634]	intracellular transport of virus [GO:0075733]; mitotic nuclear envelope disassembly [GO:0007077]; mRNA export from nucleus [GO:0006406]; protein export from nucleus [GO:0006611]; protein import into nucleus [GO:0006606]; protein sumoylation [GO:0016925]; regulation of cell cycle [GO:0051726]; regulation of cellular response to heat [GO:1900034]; regulation of gene silencing by miRNA [GO:0060964];…	nuclear export signal receptor activity [GO:0005049]; nuclear localization sequence binding [GO:0008139]; structural constituent of nuclear pore [GO:0017056]
P05198;H0YJS4;G3V4T5	-1.22097	1.13623	P05198	EIF2S1	Eukaryotic translation initiation factor 2 subunit 1 (Eukaryotic translation initiation factor 2 subunit alpha) (eIF-2-alpha) (eIF-2A) (eIF-2alpha)	315	c	cytoplasmic stress granule [GO:0010494]; cytosol [GO:0005829]; eukaryotic 48S preinitiation complex [GO:0033290]; eukaryotic translation initiation factor 2 complex [GO:0005850]; extracellular exosome [GO:0070062]; glial limiting end-foot [GO:0097451]; membrane [GO:0016020]; multi-eIF complex [GO:0043614]; nucleus [GO:0005634]; polysome [GO:0005844]; ribosome [GO:0005840]; translation initiation …	aging [GO:0007568]; cellular response to amino acid starvation [GO:0034198]; cellular response to heat [GO:0034605]; cellular response to UV [GO:0034644]; negative regulation of guanyl-nucleotide exchange factor activity [GO:1905098]; negative regulation of translational initiation in response to stress [GO:0032057]; PERK-mediated unfolded protein response [GO:0036499]; positive regulation of neu…	ribosome binding [GO:0043022]; RNA binding [GO:0003723]; translation initiation factor activity [GO:0003743]
Q13283	-0.214494	0.0491103	Q13283	G3BP1	Ras GTPase-activating protein-binding protein 1 (G3BP-1) (EC 3.6.4.12) (EC 3.6.4.13) (ATP-dependent DNA helicase VIII) (hDH VIII) (GAP SH3 domain-binding protein 1)	466	c	cytoplasmic stress granule [GO:0010494]; cytosol [GO:0005829]; focal adhesion [GO:0005925]; intracellular ribonucleoprotein complex [GO:0030529]; nucleus [GO:0005634]; plasma membrane [GO:0005886]	negative regulation of canonical Wnt signaling pathway [GO:0090090]; Ras protein signal transduction [GO:0007265]; transport [GO:0006810]	ATP binding [GO:0005524]; ATP-dependent DNA helicase activity [GO:0004003]; ATP-dependent RNA helicase activity [GO:0004004]; DNA binding [GO:0003677]; endonuclease activity [GO:0004519]; mRNA binding [GO:0003729]; RNA binding [GO:0003723]
Q92738	0.178495	0.000336823	Q92738	USP6NL	USP6 N-terminal-like protein (Related to the N-terminus of tre) (RN-tre)	828	c	cytoplasmic vesicle [GO:0031410]; cytosol [GO:0005829]; endomembrane system [GO:0012505]; plasma membrane [GO:0005886]; trans-Golgi network membrane [GO:0032588]	activation of GTPase activity [GO:0090630]; Golgi organization [GO:0007030]; intracellular protein transport [GO:0006886]; plasma membrane to endosome transport [GO:0048227]; positive regulation of GTPase activity [GO:0043547]; regulation of Golgi organization [GO:1903358]; regulation of vesicle fusion [GO:0031338]; retrograde transport, plasma membrane to Golgi [GO:0035526]; virion assembly [GO:…	GTPase activator activity [GO:0005096]; Rab GTPase binding [GO:0017137]
E9PMV1	0.364169	0.17157	E9PMV1	PLEC	Plectin (Fragment)	703	c	cytoskeleton [GO:0005856]		actin binding [GO:0003779]
K7EKI8;O60437;K7EQ71	0.257119	0.0476316	K7EKI8	PPL	Periplakin	1754	c	cytoskeleton [GO:0005856]
E9PKG0	-0.128561	0.0152726	E9PKG0	PLEC	Plectin (Fragment)	190	c	cytoskeleton [GO:0005856]		actin binding [GO:0003779]
E7EQR4;P15311;P26038;P35241;V9GZ54;E9PQ82;E9PNV3	0.21291	0.0827547	E7EQR4	EZR	Ezrin	586	c	cytoskeleton [GO:0005856]; fibrillar center [GO:0001650]; plasma membrane [GO:0005886]		actin binding [GO:0003779]
Q9HCJ0;K7EKN9;A0A1B0GU24	-0.378481	0.286868	Q9HCJ0	TNRC6C	Trinucleotide repeat-containing gene 6C protein	1690	c	cytosol [GO:0005829]	gene silencing by miRNA [GO:0035195]; miRNA mediated inhibition of translation [GO:0035278]; phosphatidylinositol-mediated signaling [GO:0048015]; positive regulation of nuclear-transcribed mRNA catabolic process, deadenylation-dependent decay [GO:1900153]; positive regulation of nuclear-transcribed mRNA poly(A) tail shortening [GO:0060213]; posttranscriptional gene silencing by RNA [GO:0035194];…	RNA binding [GO:0003723]
H0Y7N4;Q9H7D0	-1.44857	0.200807	H0Y7N4	DOCK5	Dedicator of cytokinesis protein 5 (Fragment)	1090	c	cytosol [GO:0005829]	small GTPase mediated signal transduction [GO:0007264]	guanyl-nucleotide exchange factor activity [GO:0005085]
A0A087WW88;C9J0A7;Q9UQN3	-1.13693	0.0511173	A0A087WW88	CHMP2B	Charged multivesicular body protein 2b (Fragment)	179	c	cytosol [GO:0005829]	vacuolar transport [GO:0007034]
A0A0A0MRJ6;H7BY58;P22061;F6S8N6;C9J0F2;F8WDT3;F8WAV5;F8WAX2;H7C4X2	0.126596	0.0708533	A0A0A0MRJ6	PCMT1	Protein-L-isoaspartate O-methyltransferase (EC 2.1.1.77)	285	c	cytosol [GO:0005829]		protein-L-isoaspartate (D-aspartate) O-methyltransferase activity [GO:0004719]
D6REM4;E7ETM0;P48729;U3KPX3;H0Y9X2;U3KQK7;U3KQ83;Q8N752	-2.91639	2.10524	D6REM4	CSNK1A1	Casein kinase I isoform alpha	236	c	cytosol [GO:0005829]		ATP binding [GO:0005524]; protein kinase activity [GO:0004672]
P26373;J3QSB4;H3BTH3;J3KS98	-0.286787	0.290143	P26373	RPL13	60S ribosomal protein L13 (Breast basic conserved protein 1) (Large ribosomal subunit protein eL13)	211	c	cytosol [GO:0005829]; cytosolic large ribosomal subunit [GO:0022625]; cytosolic ribosome [GO:0022626]; membrane [GO:0016020]; nucleus [GO:0005634]	nuclear-transcribed mRNA catabolic process, nonsense-mediated decay [GO:0000184]; rRNA processing [GO:0006364]; SRP-dependent cotranslational protein targeting to membrane [GO:0006614]; translation [GO:0006412]; translational initiation [GO:0006413]; viral transcription [GO:0019083]	RNA binding [GO:0003723]; structural constituent of ribosome [GO:0003735]
P62906	-0.464982	0.368177	P62906	RPL10A	60S ribosomal protein L10a (CSA-19) (Large ribosomal subunit protein uL1) (Neural precursor cell expressed developmentally down-regulated protein 6) (NEDD-6)	217	c	cytosol [GO:0005829]; cytosolic large ribosomal subunit [GO:0022625]; extracellular exosome [GO:0070062]; focal adhesion [GO:0005925]; membrane [GO:0016020]; nucleus [GO:0005634]	maturation of LSU-rRNA [GO:0000470]; nuclear-transcribed mRNA catabolic process, nonsense-mediated decay [GO:0000184]; rRNA processing [GO:0006364]; SRP-dependent cotranslational protein targeting to membrane [GO:0006614]; translation [GO:0006412]; translational initiation [GO:0006413]; viral transcription [GO:0019083]	RNA binding [GO:0003723]; structural constituent of ribosome [GO:0003735]
P50914;E7EPB3	0.272347	0.141865	P50914	RPL14	60S ribosomal protein L14 (CAG-ISL 7) (Large ribosomal subunit protein eL14)	215	c	cytosol [GO:0005829]; cytosolic large ribosomal subunit [GO:0022625]; extracellular exosome [GO:0070062]; membrane [GO:0016020]	nuclear-transcribed mRNA catabolic process, nonsense-mediated decay [GO:0000184]; ribosomal large subunit biogenesis [GO:0042273]; rRNA processing [GO:0006364]; SRP-dependent cotranslational protein targeting to membrane [GO:0006614]; translation [GO:0006412]; translational initiation [GO:0006413]; viral transcription [GO:0019083]	cadherin binding [GO:0045296]; RNA binding [GO:0003723]; structural constituent of ribosome [GO:0003735]
P47914	-0.0459652	0.00539765	P47914	RPL29	60S ribosomal protein L29 (Cell surface heparin-binding protein HIP) (Large ribosomal subunit protein eL29)	159	c	cytosol [GO:0005829]; cytosolic large ribosomal subunit [GO:0022625]; membrane [GO:0016020]	cytoplasmic translation [GO:0002181]; embryo implantation [GO:0007566]; nuclear-transcribed mRNA catabolic process, nonsense-mediated decay [GO:0000184]; rRNA processing [GO:0006364]; SRP-dependent cotranslational protein targeting to membrane [GO:0006614]; translation [GO:0006412]; translational initiation [GO:0006413]; viral transcription [GO:0019083]	cadherin binding [GO:0045296]; heparin binding [GO:0008201]; RNA binding [GO:0003723]; structural constituent of ribosome [GO:0003735]
P46778;G3V1B3;M0R181	-0.646003	0.390852	P46778	RPL21	60S ribosomal protein L21 (Large ribosomal subunit protein eL21)	160	c	cytosol [GO:0005829]; cytosolic large ribosomal subunit [GO:0022625]; membrane [GO:0016020]	nuclear-transcribed mRNA catabolic process, nonsense-mediated decay [GO:0000184]; rRNA processing [GO:0006364]; SRP-dependent cotranslational protein targeting to membrane [GO:0006614]; translation [GO:0006412]; translational initiation [GO:0006413]; viral transcription [GO:0019083]	RNA binding [GO:0003723]; structural constituent of ribosome [GO:0003735]
P78527;H0YG84	0.765307	0.792654	P78527	PRKDC	DNA-dependent protein kinase catalytic subunit (DNA-PK catalytic subunit) (DNA-PKcs) (EC 2.7.11.1) (DNPK1) (p460)	4128	c	cytosol [GO:0005829]; DNA-dependent protein kinase-DNA ligase 4 complex [GO:0005958]; extracellular matrix [GO:0031012]; membrane [GO:0016020]; nonhomologous end joining complex [GO:0070419]; nuclear chromosome, telomeric region [GO:0000784]; nucleolus [GO:0005730]; nucleoplasm [GO:0005654]; nucleus [GO:0005634]; protein complex [GO:0043234]; protein-DNA complex [GO:0032993]; transcription factor…	B cell lineage commitment [GO:0002326]; brain development [GO:0007420]; cell proliferation [GO:0008283]; cellular protein modification process [GO:0006464]; cellular response to insulin stimulus [GO:0032869]; double-strand break repair [GO:0006302]; double-strand break repair via alternative nonhomologous end joining [GO:0097681]; double-strand break repair via nonhomologous end joining [GO:00063…	ATP binding [GO:0005524]; DNA-dependent protein kinase activity [GO:0004677]; double-stranded DNA binding [GO:0003690]; enzyme binding [GO:0019899]; protein domain specific binding [GO:0019904]; protein kinase activity [GO:0004672]; protein serine/threonine kinase activity [GO:0004674]; RNA binding [GO:0003723]; transcription factor binding [GO:0008134]
P19388;A0A087WWX0;A0A087WVZ9;A0A0A0MQR7;A0A087WVN5	0.112008	0.0581965	P19388	POLR2E	DNA-directed RNA polymerases I, II, and III subunit RPABC1 (RNA polymerases I, II, and III subunit ABC1) (DNA-directed RNA polymerase II 23 kDa polypeptide) (DNA-directed RNA polymerase II subunit E) (RPB5 homolog) (XAP4)	210	c	cytosol [GO:0005829]; DNA-directed RNA polymerase I complex [GO:0005736]; DNA-directed RNA polymerase II, core complex [GO:0005665]; DNA-directed RNA polymerase III complex [GO:0005666]; nucleoplasm [GO:0005654]; nucleus [GO:0005634]	7-methylguanosine mRNA capping [GO:0006370]; fibroblast growth factor receptor signaling pathway [GO:0008543]; mRNA splicing, via spliceosome [GO:0000398]; positive regulation of gene expression, epigenetic [GO:0045815]; positive regulation of type I interferon production [GO:0032481]; positive regulation of viral transcription [GO:0050434]; regulation of gene silencing by miRNA [GO:0060964]; RNA…	DNA binding [GO:0003677]; DNA-directed 5'-3' RNA polymerase activity [GO:0003899]
P19387;H3BRR2	-1.98085	1.6876	P19387	POLR2C	DNA-directed RNA polymerase II subunit RPB3 (RNA polymerase II subunit 3) (RNA polymerase II subunit B3) (DNA-directed RNA polymerase II 33 kDa polypeptide) (RPB33) (DNA-directed RNA polymerase II subunit C) (RPB31)	275	c	cytosol [GO:0005829]; DNA-directed RNA polymerase II, core complex [GO:0005665]; microtubule cytoskeleton [GO:0015630]; nucleoplasm [GO:0005654]; nucleus [GO:0005634]	7-methylguanosine mRNA capping [GO:0006370]; fibroblast growth factor receptor signaling pathway [GO:0008543]; mRNA splicing, via spliceosome [GO:0000398]; positive regulation of viral transcription [GO:0050434]; regulation of gene silencing by miRNA [GO:0060964]; RNA metabolic process [GO:0016070]; snRNA transcription from RNA polymerase II promoter [GO:0042795]; somatic stem cell population mai…	DNA binding [GO:0003677]; DNA-directed 5'-3' RNA polymerase activity [GO:0003899]; protein dimerization activity [GO:0046983]
F8VU65;P05388;F8VPE8;G3V210;F8VW21;F8VWS0;Q8NHW5;F8VS58;F8VQY6;F8VRK7;F8VZS0;F8VWV4	0.0913475	0.0491103	F8VU65	RPLP0	60S acidic ribosomal protein P0 (Fragment)	247	c	cytosol [GO:0005829]; endoplasmic reticulum [GO:0005783]	ribosome biogenesis [GO:0042254]
G3V203;J3QQ67;Q07020;H0YHA7;F8VUA6;F8VYV2;A0A075B7A0;F8VXR6	-0.0313556	0.00539765	G3V203	RPL18	60S ribosomal protein L18 (Ribosomal protein L18, isoform CRA_b)	164	c	cytosol [GO:0005829]; endoplasmic reticulum [GO:0005783]; nucleolus [GO:0005730]; ribosome [GO:0005840]	translation [GO:0006412]	structural constituent of ribosome [GO:0003735]
Q5JR95;P62241	-0.29645	0.10745	Q5JR95	RPS8	40S ribosomal protein S8	188	c	cytosol [GO:0005829]; endoplasmic reticulum [GO:0005783]; ribosome [GO:0005840]	translation [GO:0006412]	structural constituent of ribosome [GO:0003735]
P55735;A8MXL6;E7ERC8	-0.219268	0.142455	P55735	SEC13	Protein SEC13 homolog (GATOR complex protein SEC13) (SEC13-like protein 1) (SEC13-related protein)	322	c	cytosol [GO:0005829]; endoplasmic reticulum membrane [GO:0005789]; ER to Golgi transport vesicle membrane [GO:0012507]; extracellular exosome [GO:0070062]; GATOR2 complex [GO:0061700]; Golgi membrane [GO:0000139]; intracellular membrane-bounded organelle [GO:0043231]; lysosomal membrane [GO:0005765]; nuclear envelope [GO:0005635]; nuclear pore outer ring [GO:0031080]; nucleoplasm [GO:0005654]	antigen processing and presentation of exogenous peptide antigen via MHC class II [GO:0019886]; antigen processing and presentation of peptide antigen via MHC class I [GO:0002474]; COPII vesicle coating [GO:0048208]; intracellular protein transport [GO:0006886]; mRNA transport [GO:0051028]; positive regulation of TOR signaling [GO:0032008]; sister chromatid cohesion [GO:0007062]	identical protein binding [GO:0042802]
Q13813;A0A0D9SGF6;A0A0D9SF54;A0A0D9SFF6;A0A1B0GTB7;A0A0D9SFH4	3.73673	2.20649	Q13813	SPTAN1	Spectrin alpha chain, non-erythrocytic 1 (Alpha-II spectrin) (Fodrin alpha chain) (Spectrin, non-erythroid alpha subunit)	2472	c	cytosol [GO:0005829]; extracellular exosome [GO:0070062]; extracellular region [GO:0005576]; extracellular vesicle [GO:1903561]; intracellular membrane-bounded organelle [GO:0043231]; membrane [GO:0016020]; microtubule cytoskeleton [GO:0015630]; specific granule lumen [GO:0035580]; spectrin [GO:0008091]; tertiary granule lumen [GO:1904724]	actin filament capping [GO:0051693]; axon guidance [GO:0007411]; ER to Golgi vesicle-mediated transport [GO:0006888]; MAPK cascade [GO:0000165]; neutrophil degranulation [GO:0043312]	actin binding [GO:0003779]; cadherin binding [GO:0045296]; calcium ion binding [GO:0005509]; calmodulin binding [GO:0005516]; Ras guanyl-nucleotide exchange factor activity [GO:0005088]; structural constituent of cytoskeleton [GO:0005200]
Q16778;P33778;P23527;P06899;Q8N257	3.69406	1.81834	Q16778	HIST2H2BE	Histone H2B type 2-E (Histone H2B-GL105) (Histone H2B.q) (H2B/q)	126	c	cytosol [GO:0005829]; extracellular exosome [GO:0070062]; extracellular space [GO:0005615]; nucleoplasm [GO:0005654]; nucleosome [GO:0000786]; nucleus [GO:0005634]	antibacterial humoral response [GO:0019731]; antimicrobial humoral immune response mediated by antimicrobial peptide [GO:0061844]; defense response to Gram-positive bacterium [GO:0050830]; innate immune response in mucosa [GO:0002227]; nucleosome assembly [GO:0006334]	DNA binding [GO:0003677]; protein heterodimerization activity [GO:0046982]
P62140;C9JP48;E7ETD8;C9J9S3;H0Y3Y6	-0.435853	0.504679	P62140	PPP1CB	Serine/threonine-protein phosphatase PP1-beta catalytic subunit (PP-1B) (PPP1CD) (EC 3.1.3.16) (EC 3.1.3.53)	327	c	cytosol [GO:0005829]; extracellular exosome [GO:0070062]; focal adhesion [GO:0005925]; glycogen granule [GO:0042587]; nucleolus [GO:0005730]; nucleoplasm [GO:0005654]; nucleus [GO:0005634]; protein phosphatase type 1 complex [GO:0000164]; PTW/PP1 phosphatase complex [GO:0072357]	cell division [GO:0051301]; circadian regulation of gene expression [GO:0032922]; entrainment of circadian clock by photoperiod [GO:0043153]; G2/M transition of mitotic cell cycle [GO:0000086]; glycogen metabolic process [GO:0005977]; protein dephosphorylation [GO:0006470]; regulation of cell adhesion [GO:0030155]; regulation of circadian rhythm [GO:0042752]; regulation of glycogen biosynthetic p…	metal ion binding [GO:0046872]; myosin-light-chain-phosphatase activity [GO:0050115]; myosin phosphatase activity [GO:0017018]; phosphatase activity [GO:0016791]; protein kinase binding [GO:0019901]
Q9Y265;E7ETR0;J3QLR1;H7C4G5;H7C4I3	0.679814	0.75857	Q9Y265	RUVBL1	RuvB-like 1 (EC 3.6.4.12) (49 kDa TATA box-binding protein-interacting protein) (49 kDa TBP-interacting protein) (54 kDa erythrocyte cytosolic protein) (ECP-54) (INO80 complex subunit H) (Nuclear matrix protein 238) (NMP 238) (Pontin 52) (TIP49a) (TIP60-associated protein 54-alpha) (TAP54-alpha)	456	c	cytosol [GO:0005829]; extracellular exosome [GO:0070062]; Ino80 complex [GO:0031011]; intracellular ribonucleoprotein complex [GO:0030529]; membrane [GO:0016020]; microtubule organizing center [GO:0005815]; MLL1 complex [GO:0071339]; NuA4 histone acetyltransferase complex [GO:0035267]; nuclear matrix [GO:0016363]; nucleoplasm [GO:0005654]; nucleus [GO:0005634]; R2TP complex [GO:0097255]; Swr1 com…	beta-catenin-TCF complex assembly [GO:1904837]; box C/D snoRNP assembly [GO:0000492]; cell cycle [GO:0007049]; cell division [GO:0051301]; CENP-A containing nucleosome assembly [GO:0034080]; chromatin remodeling [GO:0006338]; DNA recombination [GO:0006310]; DNA repair [GO:0006281]; histone H2A acetylation [GO:0043968]; histone H4 acetylation [GO:0043967]; positive regulation of protein targeting …	ADP binding [GO:0043531]; ATPase activity [GO:0016887]; ATPase binding [GO:0051117]; ATP binding [GO:0005524]; ATP-dependent 5'-3' DNA helicase activity [GO:0043141]; ATP-dependent DNA helicase activity [GO:0004003]; cadherin binding [GO:0045296]; DNA helicase activity [GO:0003678]; TFIID-class transcription factor binding [GO:0001094]
Q14103;H0YA96;H0Y8G5;D6RAF8;D6RF44;D6RBQ9;D6RD83	0.148168	0.0958869	Q14103	HNRNPD	Heterogeneous nuclear ribonucleoprotein D0 (hnRNP D0) (AU-rich element RNA-binding protein 1)	355	c	cytosol [GO:0005829]; extracellular exosome [GO:0070062]; intracellular ribonucleoprotein complex [GO:0030529]; nucleoplasm [GO:0005654]; nucleus [GO:0005634]	3'-UTR-mediated mRNA destabilization [GO:0061158]; cellular response to amino acid stimulus [GO:0071230]; cellular response to estradiol stimulus [GO:0071392]; cellular response to nitric oxide [GO:0071732]; cellular response to putrescine [GO:1904586]; cerebellum development [GO:0021549]; circadian regulation of translation [GO:0097167]; hepatocyte dedifferentiation [GO:1990828]; liver developme…	AT DNA binding [GO:0003680]; chromatin binding [GO:0003682]; histone deacetylase binding [GO:0042826]; mRNA 3'-UTR AU-rich region binding [GO:0035925]; RNA binding [GO:0003723]; telomeric DNA binding [GO:0042162]; transcription factor binding [GO:0008134]
Q16698;E5RJG7;E5RFV2;E5RJD2;E5RID6	0.108437	0.0558806	Q16698	DECR1	2,4-dienoyl-CoA reductase, mitochondrial (EC 1.3.1.34) (2,4-dienoyl-CoA reductase [NADPH]) (4-enoyl-CoA reductase [NADPH]) (Short chain dehydrogenase/reductase family 18C member 1)	335	c	cytosol [GO:0005829]; extracellular exosome [GO:0070062]; mitochondrial matrix [GO:0005759]; mitochondrion [GO:0005739]; nucleoplasm [GO:0005654]; nucleus [GO:0005634]	fatty acid beta-oxidation [GO:0006635]; protein homotetramerization [GO:0051289]	2,4-dienoyl-CoA reductase (NADPH) activity [GO:0008670]; NADPH binding [GO:0070402]; oxidoreductase activity, acting on NAD(P)H [GO:0016651]
P02545;Q3BDU5;Q5TCI8;H0YAB0;A0A0C4DGC5	-0.160548	0.0402223	P02545	LMNA	Prelamin-A/C [Cleaved into: Lamin-A/C (70 kDa lamin) (Renal carcinoma antigen NY-REN-32)]	664	c	cytosol [GO:0005829]; extracellular matrix [GO:0031012]; intermediate filament [GO:0005882]; lamin filament [GO:0005638]; nuclear envelope [GO:0005635]; nuclear lamina [GO:0005652]; nuclear membrane [GO:0031965]; nuclear speck [GO:0016607]; nucleoplasm [GO:0005654]; nucleus [GO:0005634]; perinuclear region of cytoplasm [GO:0048471]	cellular protein localization [GO:0034613]; cellular response to hypoxia [GO:0071456]; establishment or maintenance of microtubule cytoskeleton polarity [GO:0030951]; IRE1-mediated unfolded protein response [GO:0036498]; mitotic nuclear envelope disassembly [GO:0007077]; mitotic nuclear envelope reassembly [GO:0007084]; muscle organ development [GO:0007517]; negative regulation of cell proliferat…	identical protein binding [GO:0042802]; structural molecule activity [GO:0005198]
P12956;B1AHC9	-0.117135	0.0488706	P12956	XRCC6	X-ray repair cross-complementing protein 6 (EC 3.6.4.-) (EC 4.2.99.-) (5'-deoxyribose-5-phosphate lyase Ku70) (5'-dRP lyase Ku70) (70 kDa subunit of Ku antigen) (ATP-dependent DNA helicase 2 subunit 1) (ATP-dependent DNA helicase II 70 kDa subunit) (CTC box-binding factor 75 kDa subunit) (CTC75) (CTCBF) (DNA repair protein XRCC6) (Lupus Ku autoantigen protein p70) (Ku70) (Thyroid-lupus autoantige…	609	c	cytosol [GO:0005829]; extracellular region [GO:0005576]; ficolin-1-rich granule lumen [GO:1904813]; Ku70:Ku80 complex [GO:0043564]; membrane [GO:0016020]; nonhomologous end joining complex [GO:0070419]; nuclear chromosome, telomeric region [GO:0000784]; nuclear telomere cap complex [GO:0000783]; nucleolus [GO:0005730]; nucleoplasm [GO:0005654]; nucleus [GO:0005634]; protein complex [GO:0043234]; …	brain development [GO:0007420]; cellular hyperosmotic salinity response [GO:0071475]; cellular response to gamma radiation [GO:0071480]; cellular response to X-ray [GO:0071481]; DNA ligation [GO:0006266]; DNA recombination [GO:0006310]; double-strand break repair via classical nonhomologous end joining [GO:0097680]; double-strand break repair via nonhomologous end joining [GO:0006303]; establishm…	5'-deoxyribose-5-phosphate lyase activity [GO:0051575]; ATP binding [GO:0005524]; ATP-dependent DNA helicase activity [GO:0004003]; damaged DNA binding [GO:0003684]; DNA binding [GO:0003677]; double-stranded DNA binding [GO:0003690]; macromolecular complex binding [GO:0044877]; protein C-terminus binding [GO:0008022]; RNA binding [GO:0003723]; telomeric DNA binding [GO:0042162]; transcription reg…
Q13428	-1.1871	1.29939	Q13428	TCOF1	Treacle protein (Treacher Collins syndrome protein)	1488	c	cytosol [GO:0005829]; fibrillar center [GO:0001650]; nucleolus [GO:0005730]; nucleus [GO:0005634]	neural crest cell development [GO:0014032]; neural crest formation [GO:0014029]; regulation of translation [GO:0006417]; skeletal system development [GO:0001501]	protein heterodimerization activity [GO:0046982]; RNA binding [GO:0003723]; RNA polymerase I core binding [GO:0001042]; transporter activity [GO:0005215]
E7ETY2;J3KQ96;H0YA99;H0YAB7	-1.08141	0.93953	E7ETY2	TCOF1	Treacle protein	1488	c	cytosol [GO:0005829]; fibrillar center [GO:0001650]; nucleus [GO:0005634]
K7EMM8;Q49A26;K7EQB2	0.33683	0.265276	K7EMM8	GLYR1	Putative oxidoreductase GLYR1 (Fragment)	524	c	cytosol [GO:0005829]; Golgi apparatus [GO:0005794]; nuclear speck [GO:0016607]; nucleoplasm [GO:0005654]		NAD binding [GO:0051287]; phosphogluconate dehydrogenase (decarboxylating) activity [GO:0004616]
A0A087WY61;F5H4J1;F5H6Y5;K4DIE0;F5H0Z7;F5H763;F5H2F3;F5H3L6;F5GZW1;F5H1L0;F5H7R5;F5H4Y4;F5GWA2;F5GWK2;F5H073;F5H068;F8W6T3	-0.299564	0.0929305	A0A087WY61	NUMA1	Nuclear mitotic apparatus protein 1	2099	c	cytosol [GO:0005829]; Golgi membrane [GO:0000139]; nucleoplasm [GO:0005654]
Q07666	-0.425819	0.439592	Q07666	KHDRBS1	KH domain-containing, RNA-binding, signal transduction-associated protein 1 (GAP-associated tyrosine phosphoprotein p62) (Src-associated in mitosis 68 kDa protein) (Sam68) (p21 Ras GTPase-activating protein-associated p62) (p68)	443	c	cytosol [GO:0005829]; Grb2-Sos complex [GO:0070618]; membrane [GO:0016020]; nucleoplasm [GO:0005654]; nucleus [GO:0005634]	cell cycle arrest [GO:0007050]; cell proliferation [GO:0008283]; cell surface receptor signaling pathway [GO:0007166]; G2/M transition of mitotic cell cycle [GO:0000086]; mRNA processing [GO:0006397]; negative regulation of transcription, DNA-templated [GO:0045892]; positive regulation of RNA export from nucleus [GO:0046833]; positive regulation of translational initiation [GO:0045948]; protein o…	DNA binding [GO:0003677]; identical protein binding [GO:0042802]; poly(A) binding [GO:0008143]; poly(U) RNA binding [GO:0008266]; protein complex binding [GO:0032403]; protein domain specific binding [GO:0019904]; RNA binding [GO:0003723]; SH3/SH2 adaptor activity [GO:0005070]; SH3 domain binding [GO:0017124]
P49790	-0.599663	0.742432	P49790	NUP153	Nuclear pore complex protein Nup153 (153 kDa nucleoporin) (Nucleoporin Nup153)	1475	c	cytosol [GO:0005829]; host cell [GO:0043657]; nuclear inclusion body [GO:0042405]; nuclear membrane [GO:0031965]; nuclear periphery [GO:0034399]; nuclear pore [GO:0005643]; nuclear pore nuclear basket [GO:0044615]; nucleolus [GO:0005730]; nucleoplasm [GO:0005654]	intracellular transport of virus [GO:0075733]; mitotic nuclear envelope disassembly [GO:0007077]; mRNA export from nucleus [GO:0006406]; negative regulation of RNA export from nucleus [GO:0046832]; nuclear pore complex assembly [GO:0051292]; protein import into nucleus [GO:0006606]; protein sumoylation [GO:0016925]; regulation of cellular response to heat [GO:1900034]; regulation of gene silencin…	DNA binding [GO:0003677]; identical protein binding [GO:0042802]; metal ion binding [GO:0046872]; nuclear localization sequence binding [GO:0008139]; nucleocytoplasmic transporter activity [GO:0005487]; protein anchor [GO:0043495]; structural constituent of nuclear pore [GO:0017056]
B4DTR1;J3QLU9;P04626;J3KTI5;A0A0A0MSE1;Q15303;M0R0A7;E9PLB1;E9PRQ2;H0YCF5;H3BLT0;G3V4P9;A0A087WW79;J3KPI6;Q504U8;E9PFD7;Q16584;Q02779;P80192;P00533	-2.13497	1.37614	B4DTR1	ERBB2	Receptor protein-tyrosine kinase (EC 2.7.10.1)	979	c	cytosol [GO:0005829]; integral component of membrane [GO:0016021]; plasma membrane [GO:0005886]		ATP binding [GO:0005524]; transmembrane receptor protein tyrosine kinase activity [GO:0004714]
E9PI41;Q9NPD3	-0.377218	0.267724	E9PI41	EXOSC4	Exosome complex component RRP41 (Fragment)	261	c	cytosol [GO:0005829]; intermediate filament cytoskeleton [GO:0045111]
H0Y449;P67809;A0A0D9SEI8;Q9Y2T7;P16989	0.310708	0.19924	H0Y449	YBX1	Nuclease-sensitive element-binding protein 1 (Fragment)	374	c	cytosol [GO:0005829]; intracellular membrane-bounded organelle [GO:0043231]; nuclear membrane [GO:0031965]	regulation of transcription, DNA-templated [GO:0006355]	DNA binding [GO:0003677]
P55795	2.73818	1.71331	P55795	HNRNPH2	Heterogeneous nuclear ribonucleoprotein H2 (hnRNP H2) (FTP-3) (Heterogeneous nuclear ribonucleoprotein H') (hnRNP H') [Cleaved into: Heterogeneous nuclear ribonucleoprotein H2, N-terminally processed]	449	c	cytosol [GO:0005829]; intracellular ribonucleoprotein complex [GO:0030529]; membrane [GO:0016020]; nucleoplasm [GO:0005654]; nucleus [GO:0005634]	mRNA splicing, via spliceosome [GO:0000398]; RNA metabolic process [GO:0016070]	RNA binding [GO:0003723]
F8W883;Q9Y6X6	-3.4939	1.09325	F8W883	MYO16	Unconventional myosin-XVI	1880	c	cytosol [GO:0005829]; membrane [GO:0016020]; myosin complex [GO:0016459]	neuron projection morphogenesis [GO:0048812]; phosphatidylinositol 3-kinase signaling [GO:0014065]	actin binding [GO:0003779]; ATP binding [GO:0005524]; motor activity [GO:0003774]; protein complex binding [GO:0032403]
P05165;A0A1B0GU58;A0A1B0GUX9;A0A1B0GWI4;A0A1B0GWA1;A0A1B0GTR1;H0Y5U0;Q5JTW6;H0Y4B9;H0Y798;Q5JVH2	0.149547	0.0460982	P05165	PCCA	Propionyl-CoA carboxylase alpha chain, mitochondrial (PCCase subunit alpha) (EC 6.4.1.3) (Propanoyl-CoA:carbon dioxide ligase subunit alpha)	728	c	cytosol [GO:0005829]; mitochondrial matrix [GO:0005759]	biotin metabolic process [GO:0006768]; short-chain fatty acid catabolic process [GO:0019626]	ATP binding [GO:0005524]; biotin binding [GO:0009374]; biotin carboxylase activity [GO:0004075]; enzyme binding [GO:0019899]; metal ion binding [GO:0046872]; propionyl-CoA carboxylase activity [GO:0004658]
Q92754;C9JXZ2;H7C5E5;C1K3N0;Q96SH1;P05549;H7C4N4	0.168733	0.116114	Q92754	TFAP2C	Transcription factor AP-2 gamma (AP2-gamma) (Activating enhancer-binding protein 2 gamma) (Transcription factor ERF-1)	450	c	cytosol [GO:0005829]; mitochondrion [GO:0005739]; nucleoplasm [GO:0005654]; nucleus [GO:0005634]	cell-cell signaling [GO:0007267]; male gonad development [GO:0008584]; negative regulation of transcription from RNA polymerase II promoter [GO:0000122]; positive regulation of transcription from RNA polymerase II promoter [GO:0045944]; regulation of cell proliferation [GO:0042127]; regulation of gene expression, epigenetic [GO:0040029]; regulation of transcription from RNA polymerase II promoter…	core promoter binding [GO:0001047]; DNA binding [GO:0003677]; protein dimerization activity [GO:0046983]; RNA polymerase II regulatory region sequence-specific DNA binding [GO:0000977]; transcriptional activator activity, RNA polymerase II core promoter proximal region sequence-specific binding [GO:0001077]; transcriptional repressor activity, RNA polymerase II core promoter proximal region seque…
Q69YN4;H0YBN5	-1.24348	1.09845	Q69YN4	KIAA1429	Protein virilizer homolog	1812	c	cytosol [GO:0005829]; nuclear body [GO:0016604]; nuclear speck [GO:0016607]; nucleoplasm [GO:0005654]	mRNA methylation [GO:0080009]; mRNA processing [GO:0006397]; RNA splicing [GO:0008380]	RNA binding [GO:0003723]
X6RAL5;O00422;H7BZW6;U3KPY7;U3KQ12	1.25725	1.09599	X6RAL5	SAP18	Histone deacetylase complex subunit SAP18	172	c	cytosol [GO:0005829]; nuclear body [GO:0016604]; nucleoplasm [GO:0005654]
O75475	-0.381515	0.390852	O75475	PSIP1	PC4 and SFRS1-interacting protein (CLL-associated antigen KW-7) (Dense fine speckles 70 kDa protein) (DFS 70) (Lens epithelium-derived growth factor) (Transcriptional coactivator p75/p52)	530	c	cytosol [GO:0005829]; nuclear heterochromatin [GO:0005720]; nuclear periphery [GO:0034399]; nucleoplasm [GO:0005654]; nucleus [GO:0005634]; transcriptionally active chromatin [GO:0035327]	establishment of integrated proviral latency [GO:0075713]; mRNA 5'-splice site recognition [GO:0000395]; nuclear transport [GO:0051169]; positive regulation of transcription from RNA polymerase II promoter [GO:0045944]; regulation of transcription, DNA-templated [GO:0006355]; response to heat [GO:0009408]; response to oxidative stress [GO:0006979]; transcription, DNA-templated [GO:0006351]	activating transcription factor binding [GO:0033613]; chromatin binding [GO:0003682]; RNA binding [GO:0003723]; RNA polymerase II transcription coactivator activity [GO:0001105]; supercoiled DNA binding [GO:0097100]
O60318	-2.33979	1.65412	O60318	MCM3AP	Germinal-center associated nuclear protein (GANP) (80 kDa MCM3-associated protein) (MCM3 acetylating protein) (MCM3AP) (EC 2.3.1.-) (MCM3 acetyltransferase)	1980	c	cytosol [GO:0005829]; nuclear membrane [GO:0031965]; nuclear pore [GO:0005643]; nucleoplasm [GO:0005654]; nucleus [GO:0005634]	immune system process [GO:0002376]; mRNA transport [GO:0051028]; protein import into nucleus [GO:0006606]	DNA binding [GO:0003677]; transferase activity, transferring acyl groups [GO:0016746]
J3KPG5;F8VU39;Q9UIF9;A0A0C4DGI9;H0YII3	-1.1995	1.27826	J3KPG5	BAZ2A	Bromodomain adjacent to zinc finger domain protein 2A	1875	c	cytosol [GO:0005829]; nuclear speck [GO:0016607]		DNA binding [GO:0003677]; metal ion binding [GO:0046872]
P49750	0.315321	0.167737	P49750	YLPM1	YLP motif-containing protein 1 (Nuclear protein ZAP3) (ZAP113)	1951	c	cytosol [GO:0005829]; nuclear speck [GO:0016607]; nucleoplasm [GO:0005654]; nucleus [GO:0005634]	regulation of transcription, DNA-templated [GO:0006355]; transcription, DNA-templated [GO:0006351]	RNA binding [GO:0003723]
J3QL05;J3KP15;Q01130;Q9BRL6	0.371056	0.367917	J3QL05	SRSF2	Serine/arginine-rich-splicing factor 2 (Fragment)	130	c	cytosol [GO:0005829]; nuclear speck [GO:0016607]; nucleus [GO:0005634]	regulation of RNA splicing [GO:0043484]	RNA binding [GO:0003723]
Q9NRX1;F8WBJ6	-2.62152	0.512463	Q9NRX1	PNO1	RNA-binding protein PNO1	252	c	cytosol [GO:0005829]; nucleolus [GO:0005730]; nucleoplasm [GO:0005654]; nucleus [GO:0005634]	rRNA processing [GO:0006364]	RNA binding [GO:0003723]
Q14690	-0.641465	0.456528	Q14690	PDCD11	Protein RRP5 homolog (NF-kappa-B-binding protein) (NFBP) (Programmed cell death protein 11)	1871	c	cytosol [GO:0005829]; nucleolus [GO:0005730]; nucleoplasm [GO:0005654]; nucleus [GO:0005634]; small-subunit processome [GO:0032040]	maturation of 5.8S rRNA from tricistronic rRNA transcript (SSU-rRNA, 5.8S rRNA, LSU-rRNA) [GO:0000466]; maturation of SSU-rRNA from tricistronic rRNA transcript (SSU-rRNA, 5.8S rRNA, LSU-rRNA) [GO:0000462]; mRNA processing [GO:0006397]; rRNA processing [GO:0006364]	RNA binding [GO:0003723]; transcription factor binding [GO:0008134]
E9PC52;Q16576;Q09028;H0YF10;Q5JP02;H0YCT5;H0YDK2;Q5JP01;H0YEU5;Q5JNZ6	1.81795	1.23579	E9PC52	RBBP7	Histone-binding protein RBBP7	416	c	cytosol [GO:0005829]; nucleoplasm [GO:0005654]
G8JLB6;P31943;E9PCY7;D6RBM0;H0YB39;D6RIU0;E7EQJ0;D6RAM1;E5RGV0;D6R9T0;D6RFM3;D6RIT2;E7EN40;D6RDU3;D6RJ04;D6RIH9;H0YBD7;E5RGH4;H0YBG7;D6RDL0;H0YAQ2;D6RF17;D6R9D3;H0YBK1;H7C2J6;A0A0A6YY98;Q9NQA5	0.277468	0.296443	G8JLB6	HNRNPH1	Heterogeneous nuclear ribonucleoprotein H	472	c	cytosol [GO:0005829]; nucleoplasm [GO:0005654]		RNA binding [GO:0003723]
U3KQK0;Q99880;Q99879;Q99877;Q93079;Q5QNW6;P62807;P58876;P57053;O60814;Q96A08	1.95624	1.49255	U3KQK0	HIST1H2BN	Histone H2B	166	c	cytosol [GO:0005829]; nucleoplasm [GO:0005654]; nucleosome [GO:0000786]		DNA binding [GO:0003677]; protein heterodimerization activity [GO:0046982]
Q02880;E9PCY5	0.00691108	0.000336823	Q02880	TOP2B	DNA topoisomerase 2-beta (EC 5.99.1.3) (DNA topoisomerase II, beta isozyme)	1626	c	cytosol [GO:0005829]; nucleoplasm [GO:0005654]; nucleus [GO:0005634]	axonogenesis [GO:0007409]; DNA topological change [GO:0006265]; forebrain development [GO:0030900]; mitotic DNA integrity checkpoint [GO:0044774]; neuron migration [GO:0001764]; protein sumoylation [GO:0016925]; resolution of meiotic recombination intermediates [GO:0000712]; sister chromatid segregation [GO:0000819]	ATP binding [GO:0005524]; chromatin binding [GO:0003682]; DNA binding [GO:0003677]; DNA topoisomerase type II (ATP-hydrolyzing) activity [GO:0003918]; enzyme binding [GO:0019899]; histone deacetylase binding [GO:0042826]; metal ion binding [GO:0046872]; protein C-terminus binding [GO:0008022]; protein heterodimerization activity [GO:0046982]; protein kinase C binding [GO:0005080]
S4R3H4;E7EQT4;Q9UKV3;G3V3B0;G3V3T3;A0A087WYN3	0.365088	0.316649	S4R3H4	ACIN1	Apoptotic chromatin condensation inducer in the nucleus	1283	c	cytosol [GO:0005829]; nucleoplasm [GO:0005654]; plasma membrane [GO:0005886]		nucleic acid binding [GO:0003676]
A0A0D9SFB3;A0A0D9SG12;A0A0D9SF53;O00571;O15523;A0A0J9YVQ7;C9J081;C9J8G5;A0A087WVZ1;A0A0J9YYH6;H0Y960;D6RCM4;Q9NQI0	0.383421	0.390852	A0A0D9SFB3	DDX3X	ATP-dependent RNA helicase DDX3X	640	c	cytosol [GO:0005829]; nucleus [GO:0005634]		ATP binding [GO:0005524]; helicase activity [GO:0004386]; nucleic acid binding [GO:0003676]
E9PHV5;P28290;E7EUL7	-1.00384	0.367917	E9PHV5	SSFA2	Sperm-specific antigen 2	1237	c	cytosol [GO:0005829]; nucleus [GO:0005634]; plasma membrane [GO:0005886]		actin binding [GO:0003779]; receptor binding [GO:0005102]
E7EN95;O75369	2.61021	1.61002	E7EN95	FLNB	Filamin-B	2409	c	cytosol [GO:0005829]; plasma membrane [GO:0005886]	actin cytoskeleton organization [GO:0030036]; cell differentiation [GO:0030154]	actin binding [GO:0003779]
J3QR09;J3KTE4;P84098;J3QL15	-0.154617	0.10458	J3QR09	RPL19	Ribosomal protein L19	193	c	cytosolic large ribosomal subunit [GO:0022625]	translation [GO:0006412]	structural constituent of ribosome [GO:0003735]
Q9UHA3;H3BMQ2	-0.516846	0.55372	Q9UHA3	RSL24D1	Probable ribosome biogenesis protein RLP24 (Ribosomal L24 domain-containing protein 1) (Ribosomal protein L24-like)	163	c	cytosolic large ribosomal subunit [GO:0022625]; nucleolus [GO:0005730]; nucleus [GO:0005634]	assembly of large subunit precursor of preribosome [GO:1902626]; ribosomal large subunit assembly [GO:0000027]; translation [GO:0006412]	RNA binding [GO:0003723]; structural constituent of ribosome [GO:0003735]
Q5BKZ1;A0A0A0MRN4	-0.0919511	0.0343183	Q5BKZ1	ZNF326	DBIRD complex subunit ZNF326 (Zinc finger protein 326) (Zinc finger protein interacting with mRNPs and DBC1)	582	x	DBIRD complex [GO:0044609]; intracellular membrane-bounded organelle [GO:0043231]; nuclear matrix [GO:0016363]; nucleoplasm [GO:0005654]	mRNA processing [GO:0006397]; regulation of DNA-templated transcription, elongation [GO:0032784]; regulation of RNA splicing [GO:0043484]; RNA splicing [GO:0008380]; transcription, DNA-templated [GO:0006351]	DNA binding [GO:0003677]; metal ion binding [GO:0046872]; RNA binding [GO:0003723]; RNA polymerase II core binding [GO:0000993]
E5RGY0;B4E1G1;Q9BUN8	-0.157998	0.0958869	E5RGY0	DERL1	Derlin	151	n	endoplasmic reticulum [GO:0005783]; endoplasmic reticulum membrane [GO:0005789]; integral component of membrane [GO:0016021]
Q9BTV4	-0.794497	0.345538	Q9BTV4	TMEM43	Transmembrane protein 43 (Protein LUMA)	400	n	endoplasmic reticulum lumen [GO:0005788]; Golgi apparatus [GO:0005794]; integral component of nuclear inner membrane [GO:0005639]	nuclear membrane organization [GO:0071763]	protein self-association [GO:0043621]
Q8TEM1	-1.12616	0.757014	Q8TEM1	NUP210	Nuclear pore membrane glycoprotein 210 (Nuclear pore protein gp210) (Nuclear envelope pore membrane protein POM 210) (POM210) (Nucleoporin Nup210) (Pore membrane protein of 210 kDa)	1887	n	endoplasmic reticulum membrane [GO:0005789]; host cell [GO:0043657]; integral component of membrane [GO:0016021]; membrane [GO:0016020]; nuclear envelope [GO:0005635]; nuclear membrane [GO:0031965]; nuclear pore [GO:0005643]	intracellular transport of virus [GO:0075733]; mitotic nuclear envelope disassembly [GO:0007077]; mRNA export from nucleus [GO:0006406]; protein sumoylation [GO:0016925]; regulation of cellular response to heat [GO:1900034]; regulation of gene silencing by miRNA [GO:0060964]; regulation of glucose transport [GO:0010827]; tRNA export from nucleus [GO:0006409]; viral process [GO:0016032]; viral tra…	protein dimerization activity [GO:0046983]
P81605	0.451518	0.0122329	P81605	DCD	Dermcidin (EC 3.4.-.-) (Preproteolysin) [Cleaved into: Survival-promoting peptide; DCD-1]	110	x	extracellular exosome [GO:0070062]; extracellular matrix [GO:0031012]; extracellular region [GO:0005576]; extracellular space [GO:0005615]	antimicrobial humoral immune response mediated by antimicrobial peptide [GO:0061844]; antimicrobial humoral response [GO:0019730]; defense response to bacterium [GO:0042742]; defense response to fungus [GO:0050832]; defense response to Gram-negative bacterium [GO:0050829]; defense response to Gram-positive bacterium [GO:0050830]; killing of cells of other organism [GO:0031640]	peptidase activity [GO:0008233]; RNA binding [GO:0003723]
P62805	1.06194	1.01262	P62805	HIST1H4A	Histone H4	103	x	extracellular exosome [GO:0070062]; extracellular matrix [GO:0031012]; extracellular region [GO:0005576]; membrane [GO:0016020]; nuclear chromosome [GO:0000228]; nuclear chromosome, telomeric region [GO:0000784]; nuclear nucleosome [GO:0000788]; nucleoplasm [GO:0005654]; nucleosome [GO:0000786]; nucleus [GO:0005634]; protein complex [GO:0043234]	beta-catenin-TCF complex assembly [GO:1904837]; cellular protein metabolic process [GO:0044267]; CENP-A containing nucleosome assembly [GO:0034080]; chromatin silencing at rDNA [GO:0000183]; DNA replication-dependent nucleosome assembly [GO:0006335]; DNA replication-independent nucleosome assembly [GO:0006336]; DNA-templated transcription, initiation [GO:0006352]; double-strand break repair via n…	DNA binding [GO:0003677]; histone binding [GO:0042393]; protein domain specific binding [GO:0019904]; protein heterodimerization activity [GO:0046982]; RNA binding [GO:0003723]
P05141;Q9H0C2	0.260036	0.0929305	P05141	SLC25A5	ADP/ATP translocase 2 (ADP,ATP carrier protein 2) (ADP,ATP carrier protein, fibroblast isoform) (Adenine nucleotide translocator 2) (ANT 2) (Solute carrier family 25 member 5) [Cleaved into: ADP/ATP translocase 2, N-terminally processed]	298	x	extracellular exosome [GO:0070062]; extracellular matrix [GO:0031012]; integral component of plasma membrane [GO:0005887]; membrane [GO:0016020]; membrane raft [GO:0045121]; mitochondrial inner membrane [GO:0005743]; mitochondrial nucleoid [GO:0042645]; mitochondrion [GO:0005739]; MMXD complex [GO:0071817]; myelin sheath [GO:0043209]; nucleus [GO:0005634]	chromosome segregation [GO:0007059]; negative regulation of mitochondrial outer membrane permeabilization involved in apoptotic signaling pathway [GO:1901029]; positive regulation of cell proliferation [GO:0008284]; regulation of insulin secretion [GO:0050796]; transport [GO:0006810]; viral process [GO:0016032]	adenine transmembrane transporter activity [GO:0015207]; ATP:ADP antiporter activity [GO:0005471]; RNA binding [GO:0003723]; ubiquitin protein ligase binding [GO:0031625]
P25705;K7EK77;K7EQH4;K7EJP1;K7ENJ4;K7ERX7;K7ESA0	-0.786517	0.755011	P25705	ATP5A1	ATP synthase subunit alpha, mitochondrial	553	x	extracellular exosome [GO:0070062]; extracellular matrix [GO:0031012]; membrane [GO:0016020]; mitochondrial inner membrane [GO:0005743]; mitochondrial matrix [GO:0005759]; mitochondrial proton-transporting ATP synthase complex [GO:0005753]; mitochondrion [GO:0005739]; myelin sheath [GO:0043209]; plasma membrane [GO:0005886]; proton-transporting ATP synthase complex [GO:0045259]; proton-transporti…	ATP biosynthetic process [GO:0006754]; cristae formation [GO:0042407]; embryo development [GO:0009790]; lipid metabolic process [GO:0006629]; mitochondrial ATP synthesis coupled proton transport [GO:0042776]; negative regulation of endothelial cell proliferation [GO:0001937]; positive regulation of blood vessel endothelial cell migration [GO:0043536]	angiostatin binding [GO:0043532]; ATP binding [GO:0005524]; MHC class I protein binding [GO:0042288]; proton-transporting ATP synthase activity, rotational mechanism [GO:0046933]; RNA binding [GO:0003723]; transmembrane transporter activity [GO:0022857]
Q9Y6C9;E9PIE4	-0.321797	0.141865	Q9Y6C9	MTCH2	Mitochondrial carrier homolog 2 (Met-induced mitochondrial protein)	303	x	extracellular exosome [GO:0070062]; integral component of membrane [GO:0016021]; membrane [GO:0016020]; mitochondrial inner membrane [GO:0005743]; mitochondrion [GO:0005739]; nucleus [GO:0005634]	positive regulation of apoptotic process [GO:0043065]; protein localization to mitochondrion [GO:0070585]; transport [GO:0006810]
P53007;B4DP62	0.00337749	0.000336823	P53007	SLC25A1	Tricarboxylate transport protein, mitochondrial (Citrate transport protein) (CTP) (Solute carrier family 25 member 1) (Tricarboxylate carrier protein)	311	x	extracellular exosome [GO:0070062]; integral component of membrane [GO:0016021]; mitochondrial inner membrane [GO:0005743]; nucleus [GO:0005634]	fatty-acyl-CoA biosynthetic process [GO:0046949]; gluconeogenesis [GO:0006094]; mitochondrial citrate transport [GO:0006843]; mitochondrial transport [GO:0006839]	citrate transmembrane transporter activity [GO:0015137]; tricarboxylic acid transmembrane transporter activity [GO:0015142]
Q8WUT4	-0.15091	0.000336823	Q8WUT4	LRRN4	Leucine-rich repeat neuronal protein 4 (Neuronal leucine-rich repeat protein 4) (NLRR-4)	740	x	extracellular exosome [GO:0070062]; integral component of plasma membrane [GO:0005887]	long-term memory [GO:0007616]; visual learning [GO:0008542]
P49411	0.0520762	0.0122329	P49411	TUFM	Elongation factor Tu, mitochondrial (EF-Tu) (P43)	452	x	extracellular exosome [GO:0070062]; membrane [GO:0016020]; mitochondrial inner membrane [GO:0005743]; mitochondrial nucleoid [GO:0042645]; mitochondrion [GO:0005739]; myelin sheath [GO:0043209]	response to ethanol [GO:0045471]; translational elongation [GO:0006414]	GTPase activity [GO:0003924]; GTP binding [GO:0005525]; RNA binding [GO:0003723]; translation elongation factor activity [GO:0003746]
P22695;H3BRG4;H3BSJ9;H3BP04;H3BUE4;H3BUI9;A0A087WVZ4	-0.211032	0.0958869	P22695	UQCRC2	Cytochrome b-c1 complex subunit 2, mitochondrial (Complex III subunit 2) (Core protein II) (Ubiquinol-cytochrome-c reductase complex core protein 2)	453	x	extracellular exosome [GO:0070062]; mitochondrial inner membrane [GO:0005743]; mitochondrial respiratory chain complex III [GO:0005750]; mitochondrion [GO:0005739]; myelin sheath [GO:0043209]; nucleoplasm [GO:0005654]	aerobic respiration [GO:0009060]; mitochondrial electron transport, ubiquinol to cytochrome c [GO:0006122]; oxidative phosphorylation [GO:0006119]; protein processing involved in protein targeting to mitochondrion [GO:0006627]	metalloendopeptidase activity [GO:0004222]; protein complex binding [GO:0032403]; zinc ion binding [GO:0008270]
Q9NQX4;A0A087WY00;G3V394;F8WE88;F8W6H6;Q9Y4I1;H0YM93;H0YMK3	-1.9466	0.361438	Q9NQX4	MYO5C	Unconventional myosin-Vc	1742	x	extracellular exosome [GO:0070062]; myosin complex [GO:0016459]		actin binding [GO:0003779]; ATP binding [GO:0005524]; calmodulin binding [GO:0005516]; motor activity [GO:0003774]
P16401	0.554106	0.571232	P16401	HIST1H1B	Histone H1.5 (Histone H1a) (Histone H1b) (Histone H1s-3)	226	x	extracellular exosome [GO:0070062]; nuclear chromatin [GO:0000790]; nuclear heterochromatin [GO:0005720]; nucleosome [GO:0000786]; nucleus [GO:0005634]	chromatin organization [GO:0006325]; establishment of protein localization to chromatin [GO:0071169]; negative regulation of transcription from RNA polymerase II promoter [GO:0000122]; nucleosome assembly [GO:0006334]; positive regulation of cell growth [GO:0030307]; positive regulation of histone H3-K9 methylation [GO:0051574]; protein stabilization [GO:0050821]	chromatin DNA binding [GO:0031490]; histone deacetylase binding [GO:0042826]; RNA binding [GO:0003723]
Q71UI9;P0C0S5;C9J0D1;C9J386	0.559666	0.501677	Q71UI9	H2AFV	Histone H2A.V (H2A.F/Z)	128	x	extracellular exosome [GO:0070062]; nuclear chromatin [GO:0000790]; nucleosome [GO:0000786]; nucleus [GO:0005634]	chromatin silencing [GO:0006342]	DNA binding [GO:0003677]; protein heterodimerization activity [GO:0046982]
Q99878;Q96KK5;Q9BTM1;Q16777;Q6FI13;P0C0S8;A0A0U1RR32;A0A0U1RRH7;P20671;H0YFX9;Q96QV6	0.549613	0.55372	Q99878	HIST1H2AJ	Histone H2A type 1-J (Histone H2A/e)	128	x	extracellular exosome [GO:0070062]; nuclear chromatin [GO:0000790]; nucleosome [GO:0000786]; nucleus [GO:0005634]	chromatin silencing [GO:0006342]	DNA binding [GO:0003677]; protein heterodimerization activity [GO:0046982]
Q6PL18;A0A0B4J211	-0.183764	0.121337	Q6PL18	ATAD2	ATPase family AAA domain-containing protein 2 (EC 3.6.1.3) (AAA nuclear coregulator cancer-associated protein) (ANCCA)	1390	x	extracellular exosome [GO:0070062]; nucleoplasm [GO:0005654]; nucleus [GO:0005634]	chromatin organization [GO:0006325]; negative regulation of chromatin silencing [GO:0031936]; positive regulation of transcription, DNA-templated [GO:0045893]; positive regulation of transcription from RNA polymerase II promoter [GO:0045944]; regulation of transcription from RNA polymerase II promoter [GO:0006357]; transcription, DNA-templated [GO:0006351]	ATPase activity [GO:0016887]; ATP binding [GO:0005524]; chromatin binding [GO:0003682]; histone binding [GO:0042393]
Q8WWQ0;Q6RI45;Q9NSI6;H7C409;H7BZR9	0.46584	0.345538	Q8WWQ0	PHIP	PH-interacting protein (PHIP) (IRS-1 PH domain-binding protein) (WD repeat-containing protein 11)	1821	x	extracellular exosome [GO:0070062]; nucleus [GO:0005634]	cytoskeleton organization [GO:0007010]; insulin receptor signaling pathway [GO:0008286]; negative regulation of apoptotic process [GO:0043066]; negative regulation of extrinsic apoptotic signaling pathway [GO:2001237]; positive regulation of cell proliferation [GO:0008284]; positive regulation of insulin-like growth factor receptor signaling pathway [GO:0043568]; positive regulation of mitotic nu…	insulin receptor binding [GO:0005158]; lysine-acetylated histone binding [GO:0070577]
P12236	0.00748512	0.000336823	P12236	SLC25A6	ADP/ATP translocase 3 (ADP,ATP carrier protein 3) (ADP,ATP carrier protein, isoform T2) (ANT 2) (Adenine nucleotide translocator 3) (ANT 3) (Solute carrier family 25 member 6) [Cleaved into: ADP/ATP translocase 3, N-terminally processed]	298	x	extracellular matrix [GO:0031012]; integral component of membrane [GO:0016021]; mitochondrial inner membrane [GO:0005743]; mitochondrial inner membrane presequence translocase complex [GO:0005744]; mitochondrion [GO:0005739]; nucleus [GO:0005634]	active induction of host immune response by virus [GO:0046732]; apoptotic process [GO:0006915]; protein targeting to mitochondrion [GO:0006626]; regulation of insulin secretion [GO:0050796]; regulation of mitochondrial membrane permeability [GO:0046902]	adenine transmembrane transporter activity [GO:0015207]; ATP:ADP antiporter activity [GO:0005471]
F8W696;P02647	-1.12045	0.141865	F8W696	APOA1	Apolipoprotein A-I	245	x	extracellular region [GO:0005576]	lipid transport [GO:0006869]; lipoprotein metabolic process [GO:0042157]	lipid binding [GO:0008289]
Q9BVP2	-2.51515	1.71331	Q9BVP2	GNL3	Guanine nucleotide-binding protein-like 3 (E2-induced gene 3 protein) (Novel nucleolar protein 47) (NNP47) (Nucleolar GTP-binding protein 3) (Nucleostemin)	549	x	extracellular space [GO:0005615]; membrane [GO:0016020]; nuclear body [GO:0016604]; nucleolus [GO:0005730]; nucleus [GO:0005634]	cell proliferation [GO:0008283]; positive regulation of pri-miRNA transcription from RNA polymerase II promoter [GO:1902895]; positive regulation of protein localization to chromosome, telomeric region [GO:1904816]; positive regulation of protein sumoylation [GO:0033235]; positive regulation of telomere maintenance [GO:0032206]; regulation of cell proliferation [GO:0042127]; ribosome biogenesis […	GTPase activity [GO:0003924]; GTP binding [GO:0005525]; mRNA 5'-UTR binding [GO:0048027]; RNA binding [GO:0003723]
Q7L592	0.51109	0.0343183	Q7L592	NDUFAF7	Protein arginine methyltransferase NDUFAF7, mitochondrial (EC 2.1.1.320) (NADH dehydrogenase [ubiquinone] complex I, assembly factor 7) (Protein midA homolog)	441	x	extracellular space [GO:0005615]; mitochondrial matrix [GO:0005759]; mitochondrion [GO:0005739]	ATP metabolic process [GO:0046034]; mitochondrial respiratory chain complex I assembly [GO:0032981]; peptidyl-arginine methylation, to symmetrical-dimethyl arginine [GO:0019918]	enzyme binding [GO:0019899]; methyltransferase activity [GO:0008168]; protein-arginine omega-N symmetric methyltransferase activity [GO:0035243]
Q13123;E7EQZ7;D6REL4	0.34856	0.348283	Q13123	IK	Protein Red (Cytokine IK) (IK factor) (Protein RER)	557	x	extracellular space [GO:0005615]; nuclear speck [GO:0016607]	cell-cell signaling [GO:0007267]; immune response [GO:0006955]	identical protein binding [GO:0042802]
Q8TC92	5.79232	2.20649	Q8TC92	ENOX1	Ecto-NOX disulfide-thiol exchanger 1 (Candidate growth-related and time keeping constitutive hydroquinone [NADH] oxidase) (cCNOX) (Cell proliferation-inducing gene 38 protein) (Constitutive Ecto-NOX) (cNOX) [Includes: Hydroquinone [NADH] oxidase (EC 1.-.-.-); Protein disulfide-thiol oxidoreductase (EC 1.-.-.-)]	643	pm	extracellular space [GO:0005615]; plasma membrane [GO:0005886]	rhythmic process [GO:0048511]	nucleic acid binding [GO:0003676]; oxidoreductase activity [GO:0016491]
P0C7V6	-0.00194938	0.000336823	P0C7V6	SUPT20HL2	Putative transcription factor SPT20 homolog-like 2	817	x	extracellular space [GO:0005615]; SAGA complex [GO:0000124]		transcription cofactor activity [GO:0003712]
O60287	1.51999	1.29939	O60287	URB1	Nucleolar pre-ribosomal-associated protein 1 (Nucleolar protein 254 kDa) (URB1 ribosome biogenesis 1 homolog)	2271	n	fibrillar center [GO:0001650]; nucleolus [GO:0005730]		RNA binding [GO:0003723]
Q15061;C9JEE7;C9IZK7	1.2864	0.91194	Q15061	WDR43	WD repeat-containing protein 43 (U3 small nucleolar RNA-associated protein 5 homolog)	677	n	fibrillar center [GO:0001650]; nucleolus [GO:0005730]; nucleoplasm [GO:0005654]	positive regulation of rRNA processing [GO:2000234]; positive regulation of transcription from RNA polymerase I promoter [GO:0045943]; rRNA processing [GO:0006364]; transcription, DNA-templated [GO:0006351]	RNA binding [GO:0003723]
F1T0I1;J3KNL6;O15027;A0A0C4DH09;X6RGP5;Q8N9G1	1.33433	1.26274	F1T0I1	SEC16A	Protein transport protein Sec16A	2334	c	Golgi membrane [GO:0000139]	COPII vesicle coating [GO:0048208]
O94776;E9PCS8;H0Y4T7;E7EQY4;D6W5A2;E7EV10;E7ESY4;Q9BTC8;Q13330	-1.26077	0.934796	O94776	MTA2	Metastasis-associated protein MTA2 (Metastasis-associated 1-like 1) (MTA1-L1 protein) (p53 target protein in deacetylase complex)	668	n	histone deacetylase complex [GO:0000118]; membrane [GO:0016020]; nuclear chromatin [GO:0000790]; nucleoplasm [GO:0005654]; NuRD complex [GO:0016581]; protein complex [GO:0043234]; transcription factor complex [GO:0005667]	ATP-dependent chromatin remodeling [GO:0043044]; chromatin assembly or disassembly [GO:0006333]; DNA methylation [GO:0006306]; negative regulation of transcription from RNA polymerase II promoter [GO:0000122]; positive regulation of transcription from RNA polymerase II promoter [GO:0045944]; regulation of fibroblast migration [GO:0010762]; regulation of signal transduction by p53 class mediator […	chromatin binding [GO:0003682]; histone deacetylase activity [GO:0004407]; histone deacetylase binding [GO:0042826]; RNA polymerase II repressing transcription factor binding [GO:0001103]; RNA polymerase II transcription factor binding [GO:0001085]; sequence-specific DNA binding [GO:0043565]; transcription factor activity, sequence-specific DNA binding [GO:0003700]; transcription factor activity,…
Q92621;U3KPX2;U3KQ97	0.165778	0.0929305	Q92621	NUP205	Nuclear pore complex protein Nup205 (205 kDa nucleoporin) (Nucleoporin Nup205)	2012	n	host cell [GO:0043657]; membrane [GO:0016020]; nuclear envelope [GO:0005635]; nuclear membrane [GO:0031965]; nuclear periphery [GO:0034399]; nuclear pore [GO:0005643]; nuclear pore inner ring [GO:0044611]	intracellular transport of virus [GO:0075733]; mitotic nuclear envelope disassembly [GO:0007077]; mRNA export from nucleus [GO:0006406]; nuclear pore complex assembly [GO:0051292]; nucleocytoplasmic transport [GO:0006913]; protein sumoylation [GO:0016925]; regulation of cellular response to heat [GO:1900034]; regulation of gene silencing by miRNA [GO:0060964]; regulation of glucose transport [GO:…	structural constituent of nuclear pore [GO:0017056]
Q5SRE5;H7C4K7	-3.08505	1.68507	Q5SRE5	NUP188	Nucleoporin NUP188 homolog (hNup188)	1749	n	host cell [GO:0043657]; membrane [GO:0016020]; nuclear envelope [GO:0005635]; nuclear pore inner ring [GO:0044611]	glomerular visceral epithelial cell migration [GO:0090521]; intracellular transport of virus [GO:0075733]; mitotic nuclear envelope disassembly [GO:0007077]; mRNA export from nucleus [GO:0006406]; protein import into nucleus [GO:0006606]; protein sumoylation [GO:0016925]; regulation of cellular response to heat [GO:1900034]; regulation of gene silencing by miRNA [GO:0060964]; regulation of glucos…	structural constituent of nuclear pore [GO:0017056]
Q8NFH5;C9JWU7;C9JIY9;C9IYQ7;F8WCF5;F8WEL4	-0.804737	0.840877	Q8NFH5	NUP35	Nucleoporin NUP53 (35 kDa nucleoporin) (Mitotic phosphoprotein 44) (MP-44) (Nuclear pore complex protein Nup53) (Nucleoporin Nup35)	326	n	host cell [GO:0043657]; nuclear envelope [GO:0005635]; nuclear lamina [GO:0005652]; nuclear membrane [GO:0031965]; nuclear pore central transport channel [GO:0044613]; nuclear pore nuclear basket [GO:0044615]; nucleoplasm [GO:0005654]; plasma membrane [GO:0005886]	intracellular transport of virus [GO:0075733]; mitotic nuclear envelope disassembly [GO:0007077]; mRNA export from nucleus [GO:0006406]; NLS-bearing protein import into nucleus [GO:0006607]; nuclear pore organization [GO:0006999]; protein sumoylation [GO:0016925]; regulation of cellular response to heat [GO:1900034]; regulation of gene silencing by miRNA [GO:0060964]; regulation of glucose transp…	nucleocytoplasmic transporter activity [GO:0005487]; phospholipid binding [GO:0005543]; single-stranded DNA binding [GO:0003697]
Q7Z3B4	-1.65371	1.28653	Q7Z3B4	NUP54	Nucleoporin p54 (54 kDa nucleoporin)	507	n	host cell [GO:0043657]; nuclear envelope [GO:0005635]; nuclear membrane [GO:0031965]; nuclear pore central transport channel [GO:0044613]	intracellular transport of virus [GO:0075733]; mitotic nuclear envelope disassembly [GO:0007077]; mRNA export from nucleus [GO:0006406]; NLS-bearing protein import into nucleus [GO:0006607]; nuclear pore organization [GO:0006999]; protein heterotetramerization [GO:0051290]; protein heterotrimerization [GO:0070208]; protein homooligomerization [GO:0051260]; protein sumoylation [GO:0016925]; protei…	nucleocytoplasmic transporter activity [GO:0005487]; structural constituent of nuclear pore [GO:0017056]
O96019;C9JQT2;H7C5S0	-1.44399	1.09847	O96019	ACTL6A	Actin-like protein 6A (53 kDa BRG1-associated factor A) (Actin-related protein Baf53a) (ArpNbeta) (BRG1-associated factor 53A) (BAF53A) (INO80 complex subunit K)	429	x	Ino80 complex [GO:0031011]; npBAF complex [GO:0071564]; NuA4 histone acetyltransferase complex [GO:0035267]; nuclear chromatin [GO:0000790]; nucleoplasm [GO:0005654]; nucleus [GO:0005634]; plasma membrane [GO:0005886]; protein complex [GO:0043234]; SWI/SNF complex [GO:0016514]	ATP-dependent chromatin remodeling [GO:0043044]; chromatin remodeling [GO:0006338]; DNA recombination [GO:0006310]; DNA repair [GO:0006281]; histone H2A acetylation [GO:0043968]; histone H4 acetylation [GO:0043967]; neural retina development [GO:0003407]; positive regulation of protein targeting to mitochondrion [GO:1903955]; protein deubiquitination [GO:0016579]; regulation of growth [GO:0040008…	chromatin binding [GO:0003682]; transcription coactivator activity [GO:0003713]
E9PFT2;A0A0C4DGE7;Q86UK5	-1.20588	0.521007	E9PFT2	EVC2	Limbin	452	pm	integral component of membrane [GO:0016021]	smoothened signaling pathway [GO:0007224]
H0YG77;A0PK00	2.0136	0.122472	H0YG77	TMEM120B	Transmembrane protein 120B (Fragment)	247	pm	integral component of membrane [GO:0016021]
H0Y3Q6;Q6ZW05	0.694066	0.0581965	H0Y3Q6	PTCHD4	Patched domain-containing protein 4 (Fragment)	311	pm	integral component of membrane [GO:0016021]
Q9UJS0;R4GN64	0.0575125	0.0152726	Q9UJS0	SLC25A13	Calcium-binding mitochondrial carrier protein Aralar2 (Citrin) (Mitochondrial aspartate glutamate carrier 2) (Solute carrier family 25 member 13)	675	pm	integral component of membrane [GO:0016021]; integral component of plasma membrane [GO:0005887]; mitochondrial inner membrane [GO:0005743]; mitochondrion [GO:0005739]	aspartate transport [GO:0015810]; ATP biosynthetic process [GO:0006754]; cellular respiration [GO:0045333]; gluconeogenesis [GO:0006094]; L-glutamate transport [GO:0015813]; malate-aspartate shuttle [GO:0043490]; response to calcium ion [GO:0051592]; transport [GO:0006810]	acidic amino acid transmembrane transporter activity [GO:0015172]; calcium ion binding [GO:0005509]; L-aspartate transmembrane transporter activity [GO:0015183]; L-glutamate transmembrane transporter activity [GO:0005313]; transporter activity [GO:0005215]
Q8N201	-1.27675	0.460547	Q8N201	INTS1	Integrator complex subunit 1 (Int1)	2190	n	integral component of membrane [GO:0016021]; integrator complex [GO:0032039]; membrane [GO:0016020]; nuclear membrane [GO:0031965]; nucleoplasm [GO:0005654]	snRNA processing [GO:0016180]; snRNA transcription from RNA polymerase II promoter [GO:0042795]; U2 snRNA 3'-end processing [GO:0034474]
Q9H9B4;D6RDG7;S4R2X2;D6RFI0;D6RAE9	-0.846462	0.884695	Q9H9B4	SFXN1	Sideroflexin-1 (Tricarboxylate carrier protein) (TCC)	322	x	integral component of membrane [GO:0016021]; mitochondrial inner membrane [GO:0005743]; mitochondrion [GO:0005739]	erythrocyte differentiation [GO:0030218]; iron ion homeostasis [GO:0055072]; iron ion transport [GO:0006826]	ion transmembrane transporter activity [GO:0015075]
O75746	0.252569	0.0642766	O75746	SLC25A12	Calcium-binding mitochondrial carrier protein Aralar1 (Mitochondrial aspartate glutamate carrier 1) (Solute carrier family 25 member 12)	678	x	integral component of membrane [GO:0016021]; mitochondrial inner membrane [GO:0005743]; mitochondrion [GO:0005739]; myelin sheath [GO:0043209]	aspartate transport [GO:0015810]; gluconeogenesis [GO:0006094]; L-glutamate transport [GO:0015813]; malate-aspartate shuttle [GO:0043490]; response to calcium ion [GO:0051592]	acidic amino acid transmembrane transporter activity [GO:0015172]; calcium ion binding [GO:0005509]; L-aspartate transmembrane transporter activity [GO:0015183]; L-glutamate transmembrane transporter activity [GO:0005313]
Q96HS1;F5GXG4	-1.29182	1.33169	Q96HS1	PGAM5	Serine/threonine-protein phosphatase PGAM5, mitochondrial (EC 3.1.3.16) (Bcl-XL-binding protein v68) (Phosphoglycerate mutase family member 5)	289	x	integral component of membrane [GO:0016021]; mitochondrial outer membrane [GO:0005741]; mitochondrion [GO:0005739]	macroautophagy [GO:0016236]; necroptotic process [GO:0070266]	GTPase activator activity [GO:0005096]; phosphatase activity [GO:0016791]; protein complex binding [GO:0032403]; protein serine/threonine phosphatase activity [GO:0004722]; signal transducer, downstream of receptor, with serine/threonine phosphatase activity [GO:0009400]
F8VVM2;Q00325;F8VZL5;F8VWR4;F8VWQ0	-0.637656	0.474805	F8VVM2	SLC25A3	Phosphate carrier protein, mitochondrial	324	x	integral component of membrane [GO:0016021]; mitochondrion [GO:0005739]	transport [GO:0006810]
Q9BVI4	0.83074	0.597591	Q9BVI4	NOC4L	Nucleolar complex protein 4 homolog (NOC4 protein homolog) (NOC4-like protein) (Nucleolar complex-associated protein 4-like protein)	516	n	integral component of membrane [GO:0016021]; Noc4p-Nop14p complex [GO:0030692]; nuclear membrane [GO:0031965]; nucleolus [GO:0005730]; nucleoplasm [GO:0005654]; nucleus [GO:0005634]; small-subunit processome [GO:0032040]	maturation of SSU-rRNA from tricistronic rRNA transcript (SSU-rRNA, 5.8S rRNA, LSU-rRNA) [GO:0000462]; rRNA processing [GO:0006364]	RNA binding [GO:0003723]
B9EH20;Q8NGF4	-0.417913	0.362521	B9EH20	OR5AP2	Olfactory receptor	317	pm	integral component of membrane [GO:0016021]; plasma membrane [GO:0005886]		G-protein coupled receptor activity [GO:0004930]; olfactory receptor activity [GO:0004984]
A6NL08	-0.96897	0.637848	A6NL08	OR6C75	Olfactory receptor 6C75	312	pm	integral component of membrane [GO:0016021]; plasma membrane [GO:0005886]		G-protein coupled receptor activity [GO:0004930]; olfactory receptor activity [GO:0004984]
B7ZBT8;A0A087WTR6;A2A3E3	-0.665005	0.0289152	B7ZBT8	PCDH15	Protocadherin-15	1150	pm	integral component of membrane [GO:0016021]; plasma membrane [GO:0005886]; stereocilium [GO:0032420]	homophilic cell adhesion via plasma membrane adhesion molecules [GO:0007156]; inner ear development [GO:0048839]; sensory perception of sound [GO:0007605]	calcium ion binding [GO:0005509]
A0A087X1U6;A0A075B730	0.100392	0.0198402	A0A087X1U6	EPPK1	Epiplakin	5088	c	intermediate filament cytoskeleton [GO:0045111]		cytoskeletal protein binding [GO:0008092]
J3KNE0;A6NKT7;Q7Z3J3;J3KQ37;Q99666;O14715;F8VYC4;A0A1W2PNU4;P0DJD0;P0DJD1;F8W705;C9J1W9;C9JF75;C9J6W1;H7BZ48	0.146726	0.0834149	J3KNE0	RGPD3	RanBP2-like and GRIP domain-containing protein 3	1760	c	intracellular [GO:0005622]	protein targeting to Golgi [GO:0000042]
A0A1W2PKR9;Q5TCX8;X6R610	-5.0872	0.623774	A0A1W2PKR9	MAP3	Mitogen-activated protein kinase kinase kinase 21	1036	c	intracellular [GO:0005622]		ATP binding [GO:0005524]; MAP kinase kinase kinase activity [GO:0004709]
M0QXN5;P37198	-1.35155	1.29939	M0QXN5	NUP62	Nuclear pore glycoprotein p62	446	n	intracellular membrane-bounded organelle [GO:0043231]; nuclear membrane [GO:0031965]; nuclear pore [GO:0005643]	nuclear transport [GO:0051169]	structural constituent of nuclear pore [GO:0017056]
Q13595	-0.0338813	0.00462135	Q13595	TRA2A	Transformer-2 protein homolog alpha (TRA-2 alpha) (TRA2-alpha) (Transformer-2 protein homolog A)	282	n	intracellular membrane-bounded organelle [GO:0043231]; nucleolus [GO:0005730]; nucleus [GO:0005634]	mRNA splicing, via spliceosome [GO:0000398]	RNA binding [GO:0003723]
D6RIC3;A0A0C4DGU5;A0A087X2G6;Q9Y3C1;D6RC60;A0A087WU10	-1.69004	1.29182	D6RIC3	NOP16	Nucleolar protein 16	150	n	intracellular membrane-bounded organelle [GO:0043231]; nucleolus [GO:0005730]; nucleus [GO:0005634]
Q13151	0.610415	0.587809	Q13151	HNRNPA0	Heterogeneous nuclear ribonucleoprotein A0 (hnRNP A0)	305	n	intracellular ribonucleoprotein complex [GO:0030529]; nucleoplasm [GO:0005654]; nucleus [GO:0005634]	3'-UTR-mediated mRNA stabilization [GO:0070935]; inflammatory response [GO:0006954]; mRNA processing [GO:0006397]; mRNA splicing, via spliceosome [GO:0000398]; response to lipopolysaccharide [GO:0032496]; RNA metabolic process [GO:0016070]	AU-rich element binding [GO:0017091]; protein kinase binding [GO:0019901]; RNA binding [GO:0003723]
A0A087WUK2;O14979	0.374178	0.367917	A0A087WUK2	HNRNPDL	Heterogeneous nuclear ribonucleoprotein D-like (Heterogeneous nuclear ribonucleoprotein D-like, isoform CRA_b)	363	n	intracellular ribonucleoprotein complex [GO:0030529]; nucleoplasm [GO:0005654]; viral nucleocapsid [GO:0019013]		RNA binding [GO:0003723]
Q96E39;A0A1B0GUK8	-0.488392	0.283684	Q96E39	RBMXL1	RNA binding motif protein, X-linked-like-1 (Heterogeneous nuclear ribonucleoprotein G-like 1)	390	n	intracellular ribonucleoprotein complex [GO:0030529]; nucleus [GO:0005634]	mRNA processing [GO:0006397]; RNA splicing [GO:0008380]	RNA binding [GO:0003723]
B2R5W2;G3V4W0;B4DY08;G3V4C1;G3V2D6;G3V5V7;A0A0G2JNQ3;B2RXH8;G3V5X6;G3V3K6;G3V251;B4DSU6;G3V4M8;G3V2H6;E5RG71;B3KT61;Q86SE5	0.180834	0.0460982	B2R5W2	HNRNPC	Heterogeneous nuclear ribonucleoproteins C1/C2 (cDNA, FLJ92657, highly similar to Homo sapiens heterogeneous nuclear ribonucleoprotein C (C1/C2) (HNRPC), transcript variant 2, mRNA)	290	n	intracellular ribonucleoprotein complex [GO:0030529]; viral nucleocapsid [GO:0019013]		RNA binding [GO:0003723]
P20700;E9PBF6;A0A0D9SFE5;A0A0D9SFY5	0.0291707	0.00366528	P20700	LMNB1	Lamin-B1	586	n	lamin filament [GO:0005638]; membrane [GO:0016020]; nuclear envelope [GO:0005635]; nuclear inner membrane [GO:0005637]; nuclear matrix [GO:0016363]; nuclear membrane [GO:0031965]; nucleoplasm [GO:0005654]; nucleus [GO:0005634]		phospholipase binding [GO:0043274]; structural molecule activity [GO:0005198]
Q03252	-0.060992	0.0197828	Q03252	LMNB2	Lamin-B2	620	n	lamin filament [GO:0005638]; nuclear inner membrane [GO:0005637]		structural molecule activity [GO:0005198]
A0A087WXM6;J3QQT2;J3KRX5;A0A0A6YYL6;P18621;J3KRB3;A0A087WWH0;J3QS96;J3QLC8;A0A0A0MRF8;A0A087WY81;J3KSJ0	0.940728	0.968725	A0A087WXM6	RPL17	60S ribosomal protein L17 (Fragment)	169	c	large ribosomal subunit [GO:0015934]	translation [GO:0006412]	structural constituent of ribosome [GO:0003735]
M0QYS1;P40429;Q8J015;Q6NVV1	-1.40847	1.29939	M0QYS1	RPL13A	60S ribosomal protein L13a (Fragment)	210	c	large ribosomal subunit [GO:0015934]	translation [GO:0006412]	structural constituent of ribosome [GO:0003735]
A8MW99	-2.56717	1.65412	A8MW99	MEI4	Meiosis-specific protein MEI4	385	x	lateral element [GO:0000800]	DNA recombination [GO:0006310]; meiotic DNA double-strand break formation [GO:0042138]; oogenesis [GO:0048477]; spermatogenesis [GO:0007283]; synapsis [GO:0007129]
Q15233;H7C367;C9JYS8;C9IZL7;C9J4X2	-0.904066	1.08641	Q15233	NONO	Non-POU domain-containing octamer-binding protein (NonO protein) (54 kDa nuclear RNA- and DNA-binding protein) (55 kDa nuclear protein) (DNA-binding p52/p100 complex, 52 kDa subunit) (NMT55) (p54(nrb)) (p54nrb)	471	n	membrane [GO:0016020]; nuclear matrix [GO:0016363]; nuclear speck [GO:0016607]; nucleolus [GO:0005730]; nucleoplasm [GO:0005654]; nucleus [GO:0005634]; paraspeckles [GO:0042382]; RNA polymerase II transcription factor complex [GO:0090575]	circadian rhythm [GO:0007623]; DNA recombination [GO:0006310]; DNA repair [GO:0006281]; mRNA processing [GO:0006397]; mRNA splicing, via spliceosome [GO:0000398]; negative regulation of oxidative stress-induced neuron intrinsic apoptotic signaling pathway [GO:1903377]; negative regulation of transcription, DNA-templated [GO:0045892]; regulation of circadian rhythm [GO:0042752]; regulation of tran…	chromatin binding [GO:0003682]; core promoter binding [GO:0001047]; identical protein binding [GO:0042802]; RNA binding [GO:0003723]; RNA polymerase II distal enhancer sequence-specific DNA binding [GO:0000980]; transcription regulatory region sequence-specific DNA binding [GO:0000976]
Q1KMD3;H3BQZ7	6.32954	2.41551	Q1KMD3	HNRNPUL2	Heterogeneous nuclear ribonucleoprotein U-like protein 2 (Scaffold-attachment factor A2) (SAF-A2)	747	n	membrane [GO:0016020]; nucleoplasm [GO:0005654]; nucleus [GO:0005634]		RNA binding [GO:0003723]
C9JRZ6;Q9NX63;F8WAR4;F8WD73	-0.0922523	0.0122329	C9JRZ6	CHCHD3	MICOS complex subunit	232	x	MICOS complex [GO:0061617]
Q5JP53;P07437;Q5ST81;A0A075B736;Q5SQY0;A6NNZ2;CON__ENSEMBL:ENSBTAP00000025008;Q9H4B7;M0R1I1	-0.0243985	0.00366528	Q5JP53	TUBB	Tubulin beta chain	426	c	microtubule [GO:0005874]; microtubule cytoskeleton [GO:0015630]	microtubule-based process [GO:0007017]	GTPase activity [GO:0003924]; GTP binding [GO:0005525]; structural constituent of cytoskeleton [GO:0005200]
Q14498;A0A0U1RQH7;H0Y4X3;G3XAC6;A0A0U1RQW2;Q5QP23;A0A087X122;G3V546;G3V5Z6;Q5QP22;H0YJJ3;G3XAP0;Q86U06	-0.683905	0.745676	Q14498	RBM39	RNA-binding protein 39 (CAPER alpha) (Hepatocellular carcinoma protein 1) (RNA-binding motif protein 39) (RNA-binding region-containing protein 2) (Splicing factor HCC1)	530	c	microtubule cytoskeleton [GO:0015630]; microtubule organizing center [GO:0005815]; nuclear speck [GO:0016607]; nucleoplasm [GO:0005654]	mRNA processing [GO:0006397]; regulation of transcription, DNA-templated [GO:0006355]; RNA processing [GO:0006396]; RNA splicing [GO:0008380]; transcription, DNA-templated [GO:0006351]	RNA binding [GO:0003723]
H0YL53;O43663;G3V3N7;REV__P07476;REV__H0YGW7;A6NP16;REV__Q8NE71;E7ERM3;Q4VCS5	2.46644	1.71331	H0YL53	PRC1	Protein regulator of cytokinesis 1 (Fragment)	195	x	microtubule cytoskeleton [GO:0015630]; nucleoplasm [GO:0005654]; plasma membrane [GO:0005886]	cytokinesis [GO:0000910]; microtubule bundle formation [GO:0001578]	microtubule binding [GO:0008017]
Q9Y6N5;H3BNP9;H3BMS6;H3BNX3;A0A1B0GXB4;H3BV36	-2.4455	1.48749	Q9Y6N5	SQOR	Sulfide:quinone oxidoreductase, mitochondrial (SQOR) (EC 1.8.5.-) (Sulfide quinone oxidoreductase)	450	c	mitochondrial inner membrane [GO:0005743]	hydrogen sulfide metabolic process [GO:0070813]; sulfide oxidation, using sulfide:quinone oxidoreductase [GO:0070221]	quinone binding [GO:0048038]; sulfide:quinone oxidoreductase activity [GO:0070224]
Q8WWC4	0.281051	0.150988	Q8WWC4	MAIP1	m-AAA protease-interacting protein 1, mitochondrial (Matrix AAA peptidase-interacting protein 1)	291	c	mitochondrial inner membrane [GO:0005743]; mitochondrial matrix [GO:0005759]	inner mitochondrial membrane organization [GO:0007007]; mitochondrial calcium ion homeostasis [GO:0051560]; mitochondrial calcium ion transmembrane transport [GO:0006851]; mitochondrial calcium uptake [GO:0036444]; mitochondrial respiratory chain complex III biogenesis [GO:0097033]; mitochondrial respiratory chain complex IV biogenesis [GO:0097034]; protein insertion into mitochondrial membrane […	ribosome binding [GO:0043022]
H0Y2W2;Q9NVI7;Q5T2N8;Q5T9A4;Q5SV16	-2.58789	1.7096	H0Y2W2	ATAD3A	ATPase family AAA domain-containing protein 3A (Fragment)	572	c	mitochondrion [GO:0005739]		ATP binding [GO:0005524]
Q9UMY1;H7C2B1	-1.13245	0.390852	Q9UMY1	NOL7	Nucleolar protein 7 (Nucleolar protein of 27 kDa)	257	c	mitochondrion [GO:0005739]; nucleolus [GO:0005730]; nucleus [GO:0005634]		RNA binding [GO:0003723]
Q9ULX9;B0QY71;B0QY70	1.43897	0.711118	Q9ULX9	MAFF	Transcription factor MafF (U-Maf) (V-maf musculoaponeurotic fibrosarcoma oncogene homolog F)	164	c	mitochondrion [GO:0005739]; nucleoplasm [GO:0005654]; nucleus [GO:0005634]	blood coagulation [GO:0007596]; in utero embryonic development [GO:0001701]; parturition [GO:0007567]; regulation of epidermal cell differentiation [GO:0045604]; skeletal muscle cell differentiation [GO:0035914]; transcription from RNA polymerase II promoter [GO:0006366]	DNA binding [GO:0003677]; transcription factor activity, sequence-specific DNA binding [GO:0003700]
H7BYN3;Q00059	1.14003	1.24221	H7BYN3	TFAM	Transcription factor A, mitochondrial (Fragment)	219	c	mitochondrion [GO:0005739]; nucleus [GO:0005634]		DNA binding [GO:0003677]
Q10570	1.92746	1.50128	Q10570	CPSF1	Cleavage and polyadenylation specificity factor subunit 1 (Cleavage and polyadenylation specificity factor 160 kDa subunit) (CPSF 160 kDa subunit)	1443	n	mRNA cleavage and polyadenylation specificity factor complex [GO:0005847]; nucleoplasm [GO:0005654]	mRNA 3'-end processing [GO:0031124]; mRNA cleavage [GO:0006379]; mRNA export from nucleus [GO:0006406]; mRNA polyadenylation [GO:0006378]; mRNA splicing, via spliceosome [GO:0000398]; pre-mRNA cleavage required for polyadenylation [GO:0098789]; termination of RNA polymerase II transcription [GO:0006369]; tRNA splicing, via endonucleolytic cleavage and ligation [GO:0006388]	enzyme binding [GO:0019899]; mRNA 3'-UTR AU-rich region binding [GO:0035925]
A0A0B4J203;Q6UN15	0.37464	0.266977	Q6UN15	FIP1L1	Pre-mRNA 3'-end-processing factor FIP1 (hFip1) (FIP1-like 1 protein) (Factor interacting with PAP) (Rearranged in hypereosinophilia)	594	n	mRNA cleavage and polyadenylation specificity factor complex [GO:0005847]; nucleoplasm [GO:0005654]	mRNA 3'-end processing [GO:0031124]; mRNA export from nucleus [GO:0006406]; mRNA polyadenylation [GO:0006378]; mRNA splicing, via spliceosome [GO:0000398]; pre-mRNA cleavage required for polyadenylation [GO:0098789]; termination of RNA polymerase II transcription [GO:0006369]	RNA binding [GO:0003723]
F5H669;Q8N684;C9JM38;C9J286;C9J323;J3QT54;F5H6M0;F5H047	-0.95422	0.917845	F5H669	CPSF7	Cleavage and polyadenylation-specificity factor subunit 7 (Fragment)	374	n	mRNA cleavage factor complex [GO:0005849]		RNA binding [GO:0003723]
F8VXC8;Q8TAQ2;Q92922;F8VZW6	-1.02118	0.62338	F8VXC8	SMARCC2	SWI/SNF complex subunit SMARCC2	1245	n	nBAF complex [GO:0071565]; npBAF complex [GO:0071564]; nucleoplasm [GO:0005654]; SWI/SNF complex [GO:0016514]	chromatin remodeling [GO:0006338]; negative regulation of transcription from RNA polymerase II promoter [GO:0000122]; regulation of transcription from RNA polymerase II promoter involved in forebrain neuron fate commitment [GO:0021882]	chromatin binding [GO:0003682]; DNA binding [GO:0003677]
O95619	0.031976	0.00182298	O95619	YEATS4	YEATS domain-containing protein 4 (Glioma-amplified sequence 41) (Gas41) (NuMA-binding protein 1) (NuBI-1) (NuBI1)	227	n	NuA4 histone acetyltransferase complex [GO:0035267]; nuclear matrix [GO:0016363]; nuclear membrane [GO:0031965]; nucleoplasm [GO:0005654]	histone H2A acetylation [GO:0043968]; histone H4 acetylation [GO:0043967]; mitotic cell cycle [GO:0000278]; positive regulation of transcription, DNA-templated [GO:0045893]; positive regulation of transcription from RNA polymerase II promoter [GO:0045944]; regulation of growth [GO:0040008]; transcription, DNA-templated [GO:0006351]	DNA binding [GO:0003677]; protein C-terminus binding [GO:0008022]; structural constituent of cytoskeleton [GO:0005200]; transcription factor activity, sequence-specific DNA binding [GO:0003700]
Q86W42	-1.07687	1.10308	Q86W42	THOC6	THO complex subunit 6 homolog (Functional spliceosome-associated protein 35) (fSAP35) (WD repeat-containing protein 58)	341	n	nuclear body [GO:0016604]; nuclear speck [GO:0016607]; nucleoplasm [GO:0005654]; nucleus [GO:0005634]; THO complex [GO:0000347]; THO complex part of transcription export complex [GO:0000445]; transcription export complex [GO:0000346]	apoptotic process [GO:0006915]; central nervous system development [GO:0007417]; mRNA 3'-end processing [GO:0031124]; mRNA export from nucleus [GO:0006406]; negative regulation of apoptotic process [GO:0043066]; RNA export from nucleus [GO:0006405]; RNA splicing [GO:0008380]; termination of RNA polymerase II transcription [GO:0006369]; viral mRNA export from host cell nucleus [GO:0046784]	RNA binding [GO:0003723]
A6NNK5;Q12888;C9JXV0;H7C3N7;M0R142;H7BZY0	1.92411	1.47055	A6NNK5	TP53BP1	TP53-binding protein 1	1927	n	nuclear body [GO:0016604]; nucleoplasm [GO:0005654]
Q9UGU0;A9JX13	-0.799328	0.917459	Q9UGU0	TCF20	Transcription factor 20 (TCF-20) (Nuclear factor SPBP) (Protein AR1) (Stromelysin-1 PDGF-responsive element-binding protein) (SPRE-binding protein)	1960	n	nuclear body [GO:0016604]; nucleoplasm [GO:0005654]; nucleus [GO:0005634]	positive regulation of transcription from RNA polymerase II promoter [GO:0045944]; regulation of transcription, DNA-templated [GO:0006355]; transcription, DNA-templated [GO:0006351]	DNA binding [GO:0003677]; metal ion binding [GO:0046872]; RNA binding [GO:0003723]; RNA polymerase II core promoter proximal region sequence-specific DNA binding [GO:0000978]; transcription coactivator activity [GO:0003713]; transcription factor activity, sequence-specific DNA binding [GO:0003700]; transcription regulatory region DNA binding [GO:0044212]
P16402;P10412;Q02539;P22492	-0.363794	0.346688	P16402	HIST1H1D	Histone H1.3 (Histone H1c) (Histone H1s-2)	221	n	nuclear chromatin [GO:0000790]; nuclear euchromatin [GO:0005719]; nucleosome [GO:0000786]	histone H3-K27 trimethylation [GO:0098532]; histone H3-K4 trimethylation [GO:0080182]; negative regulation of transcription from RNA polymerase II promoter [GO:0000122]; nucleosome assembly [GO:0006334]; nucleosome positioning [GO:0016584]	chromatin DNA binding [GO:0031490]; RNA binding [GO:0003723]
Q9UHF7;E5RFF3;E5RJ97;H0YC29;H0YAV4;C9J6L7;E7EVN4;F8W8T0	-1.44437	1.48108	Q9UHF7	TRPS1	Zinc finger transcription factor Trps1 (Tricho-rhino-phalangeal syndrome type I protein) (Zinc finger protein GC79)	1281	n	nuclear chromatin [GO:0000790]; nucleoplasm [GO:0005654]; nucleus [GO:0005634]; protein complex [GO:0043234]; transcription factor complex [GO:0005667]	cell differentiation [GO:0030154]; negative regulation of transcription from RNA polymerase II promoter [GO:0000122]; NLS-bearing protein import into nucleus [GO:0006607]; protein heterooligomerization [GO:0051291]; regulation of chondrocyte differentiation [GO:0032330]; skeletal system development [GO:0001501]; transcription from RNA polymerase II promoter [GO:0006366]	chromatin binding [GO:0003682]; protein domain specific binding [GO:0019904]; RNA polymerase II regulatory region sequence-specific DNA binding [GO:0000977]; RNA polymerase II transcription factor binding [GO:0001085]; transcriptional activator activity, RNA polymerase II transcription regulatory region sequence-specific binding [GO:0001228]; transcription factor activity, sequence-specific DNA b…
P62995;H7BXF3;H7C2L4	-0.00230247	0.000336823	P62995	TRA2B	Transformer-2 protein homolog beta (TRA-2 beta) (TRA2-beta) (hTRA2-beta) (Splicing factor, arginine/serine-rich 10) (Transformer-2 protein homolog B)	288	n	nuclear inner membrane [GO:0005637]; nucleoplasm [GO:0005654]; nucleus [GO:0005634]; perinuclear region of cytoplasm [GO:0048471]; spliceosomal complex [GO:0005681]	cellular response to glucose stimulus [GO:0071333]; cerebral cortex regionalization [GO:0021796]; embryonic brain development [GO:1990403]; mRNA splicing, via spliceosome [GO:0000398]; negative regulation of mRNA splicing, via spliceosome [GO:0048025]; positive regulation of mRNA splicing, via spliceosome [GO:0048026]; protein oligomerization [GO:0051259]; regulation of alternative mRNA splicing,…	identical protein binding [GO:0042802]; mRNA binding [GO:0003729]; poly-purine tract binding [GO:0070717]; pre-mRNA binding [GO:0036002]; protein domain specific binding [GO:0019904]; RNA binding [GO:0003723]
Q9Y5J1;J3KSR7;J3QR85;J3QLD6;J3QRG0	-3.05221	1.71331	Q9Y5J1	UTP18	U3 small nucleolar RNA-associated protein 18 homolog (WD repeat-containing protein 50)	556	n	nuclear membrane [GO:0031965]; nucleolus [GO:0005730]; nucleoplasm [GO:0005654]; nucleus [GO:0005634]; Pwp2p-containing subcomplex of 90S preribosome [GO:0034388]; small-subunit processome [GO:0032040]	maturation of SSU-rRNA from tricistronic rRNA transcript (SSU-rRNA, 5.8S rRNA, LSU-rRNA) [GO:0000462]; rRNA processing [GO:0006364]	RNA binding [GO:0003723]
P18583;J3QSZ5	0.0717341	0.0415839	P18583	SON	Protein SON (Bax antagonist selected in saccharomyces 1) (BASS1) (Negative regulatory element-binding protein) (NRE-binding protein) (Protein DBP-5) (SON3)	2426	n	nuclear speck [GO:0016607]	microtubule cytoskeleton organization [GO:0000226]; mitotic cytokinesis [GO:0000281]; mRNA processing [GO:0006397]; negative regulation of apoptotic process [GO:0043066]; regulation of cell cycle [GO:0051726]; regulation of mRNA splicing, via spliceosome [GO:0048024]; regulation of RNA splicing [GO:0043484]; RNA splicing [GO:0008380]	DNA binding [GO:0003677]; RNA binding [GO:0003723]; RS domain binding [GO:0050733]
E9PB61;Q86V81	0.702144	0.794512	E9PB61	ALYREF	THO complex subunit 4	264	n	nuclear speck [GO:0016607]		RNA binding [GO:0003723]
Q5STU3;O00148;Q13838;F6S4E6;A0A0A0MT12;F6TRA5;K7EQN7;F6WLT2;A0A140T9X3;A0A0G2JJZ9;K7ENP6;A0A0G2JHN7;K7EL56;K7EIL8;F6U6E2;K7EN69;A0A140T9L4;F6S2B7;A0A140T973;F6SXL5;A0A140T9K1;A0A140T9X9;F6QYI9;A0A0G2JJL7;H0Y400;K7EPJ3;A0A140T996;F6R6M7;F6UJC5;A0A140TA18	0.129947	0.0741388	Q5STU3	DDX39B	Spliceosome RNA helicase DDX39B	425	n	nuclear speck [GO:0016607]		ATP binding [GO:0005524]; nucleic acid binding [GO:0003676]
Q13247;A0A0D9SEM4;Q08170;B4DJK0;B4DUA4;Q13243	0.647013	0.545811	Q13247	SRSF6	Serine/arginine-rich splicing factor 6 (Pre-mRNA-splicing factor SRP55) (Splicing factor, arginine/serine-rich 6)	344	n	nuclear speck [GO:0016607]; nucleoplasm [GO:0005654]	alternative mRNA splicing, via spliceosome [GO:0000380]; mRNA 3'-end processing [GO:0031124]; mRNA export from nucleus [GO:0006406]; mRNA splice site selection [GO:0006376]; mRNA splicing, via spliceosome [GO:0000398]; negative regulation of cell death [GO:0060548]; negative regulation of keratinocyte differentiation [GO:0045617]; negative regulation of mRNA splicing, via spliceosome [GO:0048025]…	pre-mRNA binding [GO:0036002]; RNA binding [GO:0003723]
P0DN76;Q01081;Q8WU68	-1.97981	1.71331	P0DN76	U2AF1L5	Splicing factor U2AF 35 kDa subunit-like protein (U2 small nuclear RNA auxiliary factor 1-like protein 5)	240	n	nuclear speck [GO:0016607]; U2AF [GO:0089701]	mRNA splicing, via spliceosome [GO:0000398]	metal ion binding [GO:0046872]; RNA binding [GO:0003723]; RS domain binding [GO:0050733]
Q9NWT1	-2.09444	1.25313	Q9NWT1	PAK1IP1	p21-activated protein kinase-interacting protein 1 (PAK/PLC-interacting protein 1) (hPIP1) (PAK1-interacting protein 1) (WD repeat-containing protein 84)	392	n	nucleolus [GO:0005730]	cell proliferation [GO:0008283]; negative regulation of signal transduction [GO:0009968]; palate development [GO:0060021]; regulation of signal transduction by p53 class mediator [GO:1901796]; ribosomal large subunit biogenesis [GO:0042273]
B9A008;E7ENR5;H0Y714;Q96G21	0.103782	0.0511173	B9A008	IMP4	U3 small nucleolar ribonucleoprotein protein IMP4 (Fragment)	172	n	nucleolus [GO:0005730]
E9PPY3;O43159	-0.478844	0.545811	E9PPY3	RRP8	Ribosomal RNA-processing protein 8	306	n	nucleolus [GO:0005730]		methyltransferase activity [GO:0008168]
Q9Y2P8;Q5VZU2;Q5VYW8;Q5VZU3	-0.339773	0.201598	Q9Y2P8	RCL1	RNA 3'-terminal phosphate cyclase-like protein	373	n	nucleolus [GO:0005730]; nucleoplasm [GO:0005654]	endonucleolytic cleavage in 5'-ETS of tricistronic rRNA transcript (SSU-rRNA, 5.8S rRNA, LSU-rRNA) [GO:0000480]; endonucleolytic cleavage in ITS1 to separate SSU-rRNA from 5.8S rRNA and LSU-rRNA from tricistronic rRNA transcript (SSU-rRNA, 5.8S rRNA, LSU-rRNA) [GO:0000447]; endonucleolytic cleavage of tricistronic rRNA transcript (SSU-rRNA, 5.8S rRNA, LSU-rRNA) [GO:0000479]; rRNA processing [GO:0…	endoribonuclease activity [GO:0004521]
Q13242;H0YIB4;S4R3G0	-0.716426	0.73471	Q13242	SRSF9	Serine/arginine-rich splicing factor 9 (Pre-mRNA-splicing factor SRp30C) (Splicing factor, arginine/serine-rich 9)	221	n	nucleolus [GO:0005730]; nucleoplasm [GO:0005654]	mRNA 3'-end processing [GO:0031124]; mRNA export from nucleus [GO:0006406]; mRNA processing [GO:0006397]; mRNA splice site selection [GO:0006376]; mRNA splicing, via spliceosome [GO:0000398]; negative regulation of mRNA splicing, via spliceosome [GO:0048025]; response to alkaloid [GO:0043279]; response to toxic substance [GO:0009636]; RNA export from nucleus [GO:0006405]; termination of RNA polym…	protein domain specific binding [GO:0019904]; RNA binding [GO:0003723]
Q9GZL7	-0.331249	0.125709	Q9GZL7	WDR12	Ribosome biogenesis protein WDR12 (WD repeat-containing protein 12)	423	n	nucleolus [GO:0005730]; nucleoplasm [GO:0005654]; PeBoW complex [GO:0070545]; preribosome, large subunit precursor [GO:0030687]	cell proliferation [GO:0008283]; maturation of 5.8S rRNA from tricistronic rRNA transcript (SSU-rRNA, 5.8S rRNA, LSU-rRNA) [GO:0000466]; maturation of LSU-rRNA from tricistronic rRNA transcript (SSU-rRNA, 5.8S rRNA, LSU-rRNA) [GO:0000463]; Notch signaling pathway [GO:0007219]; ribosomal large subunit biogenesis [GO:0042273]; rRNA processing [GO:0006364]
Q9H8H0;J3QLQ6;J3QR28	0.808972	0.662112	Q9H8H0	NOL11	Nucleolar protein 11	719	n	nucleolus [GO:0005730]; nucleoplasm [GO:0005654]; t-UTP complex [GO:0034455]	maturation of SSU-rRNA [GO:0030490]; positive regulation of transcription of nuclear large rRNA transcript from RNA polymerase I promoter [GO:1901838]; rRNA processing [GO:0006364]; transcription, DNA-templated [GO:0006351]	RNA binding [GO:0003723]
B4DY09;Q12905;X6R6Z1;A0A0A0MRL0	0.373932	0.367917	B4DY09	ILF2	Interleukin enhancer-binding factor 2 (cDNA FLJ51660, highly similar to Interleukin enhancer-binding factor 2)	352	n	nucleolus [GO:0005730]; nucleus [GO:0005634]	immune response [GO:0006955]	ATP binding [GO:0005524]; RNA binding [GO:0003723]; transferase activity [GO:0016740]
Q9H7B2;Q5VXN0	-0.73685	0.545811	Q9H7B2	RPF2	Ribosome production factor 2 homolog (Brix domain-containing protein 1) (Ribosome biogenesis protein RPF2 homolog)	306	n	nucleolus [GO:0005730]; nucleus [GO:0005634]	maturation of LSU-rRNA from tricistronic rRNA transcript (SSU-rRNA, 5.8S rRNA, LSU-rRNA) [GO:0000463]; protein localization to nucleolus [GO:1902570]; regulation of signal transduction by p53 class mediator [GO:1901796]; ribosomal large subunit assembly [GO:0000027]; ribosomal large subunit biogenesis [GO:0042273]	5S rRNA binding [GO:0008097]; RNA binding [GO:0003723]; rRNA binding [GO:0019843]
Q8TDN6	0.443976	0.513227	Q8TDN6	BRIX1	Ribosome biogenesis protein BRX1 homolog (Brix domain-containing protein 2)	353	n	nucleolus [GO:0005730]; nucleus [GO:0005634]	ribosomal large subunit assembly [GO:0000027]	RNA binding [GO:0003723]
H7C2Q8;Q99848	0.453942	0.439948	H7C2Q8	EBNA1BP2	EBNA1 binding protein 2, isoform CRA_d (Probable rRNA-processing protein EBP2)	361	n	nucleolus [GO:0005730]; nucleus [GO:0005634]
P56182;D6RE82	1.24484	0.983041	P56182	RRP1	Ribosomal RNA processing protein 1 homolog A (Novel nuclear protein 1) (NNP-1) (Nucleolar protein Nop52) (RRP1-like protein)	461	n	nucleolus [GO:0005730]; nucleus [GO:0005634]; preribosome, large subunit precursor [GO:0030687]; preribosome, small subunit precursor [GO:0030688]	rRNA processing [GO:0006364]	RNA binding [GO:0003723]
Q9P031;F8VNY5	1.98748	1.50128	Q9P031	CCDC59	Thyroid transcription factor 1-associated protein 26 (TTF-1-associated protein 26) (Coiled-coil domain-containing protein 59) (TTF-1-associated protein BR2)	241	n	nucleoplasm [GO:0005654]	cellular protein metabolic process [GO:0044267]; regulation of transcription, DNA-templated [GO:0006355]; transcription, DNA-templated [GO:0006351]	RNA binding [GO:0003723]
M0QXS5;P14866;M0QYT0;M0R076;M0R1W6;B4DVF8;M0QYL7;H7C464;B7WPG3;C9IYN3;D6W592;Q8WVV9	-0.44646	0.403005	M0QXS5	HNRNPL	Heterogeneous nuclear ribonucleoprotein L (Fragment)	530	n	nucleoplasm [GO:0005654]	mRNA processing [GO:0006397]	RNA binding [GO:0003723]
H3BPE7;P35637;A0A075B7D9;Q92804	-0.963488	0.758091	H3BPE7	FUS	RNA-binding protein FUS	527	n	nucleoplasm [GO:0005654]	regulation of transcription, DNA-templated [GO:0006355]	metal ion binding [GO:0046872]; RNA binding [GO:0003723]
F8W6I7;P09651;F8VZ49;Q32P51;F8VTQ5;F8W646;H0YH80;F8VYN5	0.39366	0.390852	F8W6I7	HNRNPA1	Heterogeneous nuclear ribonucleoprotein A1	307	n	nucleoplasm [GO:0005654]		RNA binding [GO:0003723]
Q8N165	0.0844973	0.0214098	Q8N165	PDIK1L	Serine/threonine-protein kinase PDIK1L (EC 2.7.11.1) (PDLIM1-interacting kinase 1-like)	341	n	nucleoplasm [GO:0005654]		ATP binding [GO:0005524]; protein serine/threonine kinase activity [GO:0004674]
D6R9P3;D6RD18;D6RBZ0;Q99729	0.0306338	0.00539765	D6R9P3	HNRNPAB	Heterogeneous nuclear ribonucleoprotein A/B	280	n	nucleoplasm [GO:0005654]		RNA binding [GO:0003723]
J3QLE5;P63162;P14678;J3KRY3;S4R3P3	-0.511057	0.345538	J3QLE5	SNRPN	Small nuclear ribonucleoprotein-associated protein N (Fragment)	169	n	nucleoplasm [GO:0005654]
F5GXF5;E7ETD6;Q12830	-0.925039	0.939743	F5GXF5	BPTF	Nucleosome-remodeling factor subunit BPTF (Fragment)	2457	n	nucleoplasm [GO:0005654]		metal ion binding [GO:0046872]
P31942	0.0915191	0.0476316	P31942	HNRNPH3	Heterogeneous nuclear ribonucleoprotein H3 (hnRNP H3) (Heterogeneous nuclear ribonucleoprotein 2H9) (hnRNP 2H9)	346	n	nucleoplasm [GO:0005654]; nucleus [GO:0005634]; spliceosomal complex [GO:0005681]	epithelial cell differentiation [GO:0030855]; mRNA splicing, via spliceosome [GO:0000398]; RNA processing [GO:0006396]; RNA splicing [GO:0008380]	RNA binding [GO:0003723]
Q7KZ85	-0.242761	0.226146	Q7KZ85	SUPT6H	Transcription elongation factor SPT6 (hSPT6) (Histone chaperone suppressor of Ty6) (Tat-cotransactivator 2 protein) (Tat-CT2 protein)	1726	n	nucleoplasm [GO:0005654]; nucleus [GO:0005634]; transcriptionally active chromatin [GO:0035327]; transcription elongation factor complex [GO:0008023]	chromatin maintenance [GO:0070827]; chromatin remodeling [GO:0006338]; chromatin silencing [GO:0006342]; mRNA processing [GO:0006397]; mRNA transcription from RNA polymerase II promoter [GO:0042789]; mRNA transport [GO:0051028]; negative regulation of histone H3-K27 methylation [GO:0061086]; nucleosome organization [GO:0034728]; positive regulation of transcription elongation from RNA polymerase …	DNA binding [GO:0003677]; histone binding [GO:0042393]; nucleosome binding [GO:0031491]; RNA binding [GO:0003723]; transcription factor activity, core RNA polymerase II binding [GO:0000991]; transcription factor activity, sequence-specific DNA binding [GO:0003700]
P09012;M0QZG7;M0R268;M0QXK2;M0R221;M0R2B8;M0R0G9	-0.493563	0.572276	P09012	SNRPA	U1 small nuclear ribonucleoprotein A (U1 snRNP A) (U1-A) (U1A)	282	n	nucleoplasm [GO:0005654]; spliceosomal complex [GO:0005681]; U1 snRNP [GO:0005685]	mRNA splicing, via spliceosome [GO:0000398]; regulation of mRNA polyadenylation [GO:1900363]	identical protein binding [GO:0042802]; RNA binding [GO:0003723]; snRNA stem-loop binding [GO:0035614]; U1 snRNA binding [GO:0030619]; U1 snRNP binding [GO:1990446]
Q15427	0.0174063	0.000336823	Q15427	SF3B4	Splicing factor 3B subunit 4 (Pre-mRNA-splicing factor SF3b 49 kDa subunit) (SF3b50) (Spliceosome-associated protein 49) (SAP 49)	424	n	nucleoplasm [GO:0005654]; spliceosomal complex [GO:0005681]; U12-type spliceosomal complex [GO:0005689]	mRNA processing [GO:0006397]; mRNA splicing, via spliceosome [GO:0000398]; positive regulation of mRNA splicing, via spliceosome [GO:0048026]; RNA splicing [GO:0008380]; RNA splicing, via transesterification reactions [GO:0000375]	RNA binding [GO:0003723]
K7EK07;Q71DI3;Q16695;P84243;P68431;K7EMV3;B4DEB1;K7ES00;Q6NXT2;K7EP01	1.38321	1.11378	K7EK07	H3F3B	Histone H3 (Fragment)	132	n	nucleosome [GO:0000786]; nucleus [GO:0005634]		DNA binding [GO:0003677]; protein heterodimerization activity [GO:0046982]
B5MDF5;J3KQE5;P62826;F5H018;H0YFC6;B4DV51	0.0753909	0.0198402	B5MDF5	RAN	GTP-binding nuclear protein Ran	233	n	nucleus [GO:0005634]	intracellular protein transport [GO:0006886]; nucleocytoplasmic transport [GO:0006913]; signal transduction [GO:0007165]	GTPase activity [GO:0003924]; GTP binding [GO:0005525]
A6NLN1;P26599;A0A0U1RRM4;A0A0D9SF20;A0A087WU68;K7EK45;A0A087WUW5;K7ES59;K7EKJ7;K7ELW5	-0.675087	0.773112	A6NLN1	PTBP1	Polypyrimidine tract binding protein 1, isoform CRA_b (Polypyrimidine tract-binding protein 1)	527	n	nucleus [GO:0005634]	mRNA processing [GO:0006397]	RNA binding [GO:0003723]
K7ENG2;P26368	-1.53699	1.54896	K7ENG2	U2AF2	Splicing factor U2AF 65 kDa subunit	307	n	nucleus [GO:0005634]	mRNA processing [GO:0006397]	RNA binding [GO:0003723]
Q8TBZ5	3.87478	0.606707	Q8TBZ5	ZNF502	Zinc finger protein 502	544	n	nucleus [GO:0005634]	positive regulation by host of viral process [GO:0044794]; positive regulation by host of viral release from host cell [GO:0044791]; regulation of transcription, DNA-templated [GO:0006355]; transcription, DNA-templated [GO:0006351]	DNA binding [GO:0003677]; metal ion binding [GO:0046872]
B9ZVN9;O95602;O14802	-0.284326	0.290143	B9ZVN9	POLR1A	DNA-directed RNA polymerase subunit (EC 2.7.7.6)	1659	n	nucleus [GO:0005634]	transcription, DNA-templated [GO:0006351]	DNA binding [GO:0003677]; DNA-directed 5'-3' RNA polymerase activity [GO:0003899]; zinc ion binding [GO:0008270]
E7EQB9;O15160;D6RDJ3;H0Y723	-2.52827	1.09599	E7EQB9	POLR1C	DNA-directed RNA polymerases I and III subunit RPAC1	296	n	nucleus [GO:0005634]	transcription, DNA-templated [GO:0006351]	DNA binding [GO:0003677]; DNA-directed 5'-3' RNA polymerase activity [GO:0003899]; protein dimerization activity [GO:0046983]
A0A0R4J2E8;A8MXP9;P43243;D6REM6;D6R991;H0Y8T4;B3KM87;Q68E03;D6RAM9;D6RAY2;D6RBI2;D6RE02;D6RIA2;D6RB45;A0A1B0GX04;D6R9F3;D6RBS2;D6RCM3;D6REK4;D6R8Z5;D6RBK5	6.03592	2.35077	A0A0R4J2E8	MATR3	Matrin-3	847	n	nucleus [GO:0005634]		RNA binding [GO:0003723]; zinc ion binding [GO:0008270]
A0A1W2PPS1;Q00839;A0A1W2PP35;A0A1X7SBS1;Q5RI18;A0A1W2PQL0;A0A1W2PP34;A0A1W2PPL4;A0A1W2PPH7;A0A1W2PQ74;A0A1W2PRZ7;A0A1W2PQD4;A0A1W2PPE9;A0A1W2PRI6;M0QYG9;M0QYM5;M0QYI8;A0A1W2PP22	4.4346	2.28703	A0A1W2PPS1	HNRNPU	Heterogeneous nuclear ribonucleoprotein U	804	n	nucleus [GO:0005634]
E7EVG2;Q86U86;H0Y5B5;C9JPI5	2.24327	1.65412	E7EVG2	PBRM1	Protein polybromo-1 (Fragment)	1460	n	nucleus [GO:0005634]		chromatin binding [GO:0003682]; DNA binding [GO:0003677]
D6RC76;D6RHD3;Q9BS16	0.504253	0.304507	D6RC76	CENPK	Centromere protein K (Fragment)	176	n	nucleus [GO:0005634]
A0A0G2JPF8;P0DMR1;O60812;B7ZW38	-0.239283	0.160706	P0DMR1	HNRNPCL4	Heterogeneous nuclear ribonucleoprotein C-like 4	293	n	nucleus [GO:0005634]		RNA binding [GO:0003723]
I3VM54;Q9Y2K7	-0.408983	0.278809	I3VM54	KDM2A	Lysine-specific demethylase 2A (N-terminus deleted lysine-specific demethylase 2A)	1145	n	nucleus [GO:0005634]		DNA binding [GO:0003677]; methyltransferase activity [GO:0008168]; zinc ion binding [GO:0008270]
F5GWX5;A0A0C4DGG9;Q14839;Q8TDI0;K7EMY3;Q12873;F2Z2R5;F5H6N4;K7EPV1;K7ESA5;I3L229;H7C3H7;H7C0J3	-0.391199	0.306149	F5GWX5	CHD4	Chromodomain-helicase-DNA-binding protein 4	1905	n	nucleus [GO:0005634]; NuRD complex [GO:0016581]	chromatin organization [GO:0006325]; spindle assembly [GO:0051225]	ATP binding [GO:0005524]; metal ion binding [GO:0046872]; microtubule binding [GO:0008017]
Q7Z6R9;Q6VUC0;Q92481	-0.1282	0.0929305	Q7Z6R9	TFAP2D	Transcription factor AP-2-delta (AP2-delta) (Activating enhancer-binding protein 2-delta) (Transcription factor AP-2-beta-like 1)	452	n	nucleus [GO:0005634]; transcription factor complex [GO:0005667]	anatomical structure development [GO:0048856]; inferior colliculus development [GO:0061379]; negative regulation of neuron apoptotic process [GO:0043524]; positive regulation of transcription from RNA polymerase II promoter [GO:0045944]; regulation of cell proliferation [GO:0042127]; transcription, DNA-templated [GO:0006351]	RNA polymerase II regulatory region sequence-specific DNA binding [GO:0000977]; RNA polymerase II transcription factor activity, sequence-specific DNA binding [GO:0000981]
Q9Y3B9	-1.64404	1.13939	Q9Y3B9	RRP15	RRP15-like protein (Ribosomal RNA-processing protein 15)	282	x	preribosome, large subunit precursor [GO:0030687]	maturation of 5.8S rRNA [GO:0000460]; maturation of LSU-rRNA [GO:0000470]
Q5SRQ3;Q5SRQ6;N0E472;A0A0G2JM12;P67870	0.887405	1.09008	Q5SRQ3	CSNK2B	Casein kinase II subunit beta (CK II beta)	228	x	protein kinase CK2 complex [GO:0005956]		protein kinase regulator activity [GO:0019887]
H7BY10;K7EJV9;K7ERT8;A8MUS3;P62750;K7EMA7	1.20872	1.24221	H7BY10	RPL23A	60S ribosomal protein L23a (Fragment)	158	c	ribosome [GO:0005840]	translation [GO:0006412]	structural constituent of ribosome [GO:0003735]
D6RAN4;P32969;H0Y9R4;H0Y9V9;E7ESE0	0.856426	0.968725	D6RAN4	RPL9	60S ribosomal protein L9 (Fragment)	181	c	ribosome [GO:0005840]	translation [GO:0006412]	rRNA binding [GO:0019843]; structural constituent of ribosome [GO:0003735]
M0R3D6;M0R1A7;M0R117;Q02543;M0R0P7	0.247188	0.0929305	M0R3D6	RPL18A	60S ribosomal protein L18a (Fragment)	141	c	ribosome [GO:0005840]	translation [GO:0006412]	structural constituent of ribosome [GO:0003735]
E5RI99;P62888	0.0040128	0.000336823	E5RI99	RPL30	60S ribosomal protein L30 (Fragment)	114	c	ribosome [GO:0005840]	translation [GO:0006412]	structural constituent of ribosome [GO:0003735]
E9PKZ0;P62917;E9PP36;G3V1A1;E9PKU4	-0.414669	0.448687	E9PKZ0	RPL8	60S ribosomal protein L8 (Fragment)	205	c	ribosome [GO:0005840]	translation [GO:0006412]	structural constituent of ribosome [GO:0003735]
A0A024R4M0;P46781;B5MCT8;C9JM19;F2Z3C0;A8MXK4	0.685314	0.711118	A0A024R4M0	RPS9	40S ribosomal protein S9 (Ribosomal protein S9, isoform CRA_a)	194	c	small ribosomal subunit [GO:0015935]	translation [GO:0006412]	rRNA binding [GO:0019843]; structural constituent of ribosome [GO:0003735]
M0R0F0;M0R0R2;P46782;M0QZN2	0.0110679	0.000336823	M0R0F0	RPS5	40S ribosomal protein S5 (Fragment)	200	c	small ribosomal subunit [GO:0015935]	translation [GO:0006412]	RNA binding [GO:0003723]; structural constituent of ribosome [GO:0003735]
H0YEN5;P15880;E9PQD7;I3L404;E9PM36;E9PMM9;E9PPT0	-1.00933	1.1264	H0YEN5	RPS2	40S ribosomal protein S2 (Fragment)	195	c	small ribosomal subunit [GO:0015935]	translation [GO:0006412]	RNA binding [GO:0003723]; structural constituent of ribosome [GO:0003735]
A0A087WUZ3;Q01082;F8W6C1	1.39574	0.254611	A0A087WUZ3	SPTBN1	Spectrin beta chain	2366	c	spectrin [GO:0008091]	actin filament capping [GO:0051693]	actin binding [GO:0003779]; phospholipid binding [GO:0005543]; structural constituent of cytoskeleton [GO:0005200]
J3QKS7;B4DGM3;Q969G3;J3KS99;J3QL66;J3QKX6;J3QR61;H7C048;K7EMQ8	2.17207	1.58631	J3QKS7	SMARCE1	SWI/SNF-related matrix-associated actin-dependent regulator of chromatin subfamily E member 1 (Fragment)	288	n	SWI/SNF complex [GO:0016514]	ATP-dependent chromatin remodeling [GO:0043044]	DNA binding [GO:0003677]
Q9HBD4;P51532;A0A0A0MT49;P51531;A0A0U1RQZ9;F6VDE0;K7EP28;A0A0U1RRF5;A0A0U1RRD6;A0A0U1RRF8;A0A0A0MSS5;F6UH26;A0A0U1RQU0;A0A0U1RR09;F6XE55;A0A0U1RQW7;A0A0U1RRN2;B1ALG1;A0A0U1RR83;A0A0U1RQX3;F6T8Q0;B1ALG2;A0A0U1RR26;A0A0U1RRG6;B4DNT1;B1ALF6;A0A0U1RQE1;REV__Q8N5H7	-0.0627907	0.0122329	Q9HBD4	SMARCA4	SMARCA4 isoform 2 (SWI/SNF related, matrix associated, actin dependent regulator of chromatin, subfamily a, member 4, isoform CRA_c) (Transcription activator BRG1)	1679	n	SWI/SNF complex [GO:0016514]	ATP-dependent chromatin remodeling [GO:0043044]; regulation of transcription, DNA-templated [GO:0006355]	ATPase activity [GO:0016887]; ATP binding [GO:0005524]; histone binding [GO:0042393]
F8WF22;A0A024R341;Q6I9Y2	0.124063	0.0161984	F8WF22	THOC7	THO complex subunit 7 homolog (Fragment)	60	n	THO complex part of transcription export complex [GO:0000445]	mRNA processing [GO:0006397]
H7C4Y7;A0A087WZ85;A0A0A0MSX4;A0A087WTM1;Q9Y6N7	0.866006	0.723894	H7C4Y7	ROBO1	Roundabout homolog 1 (Fragment)	192	x		axon guidance [GO:0007411]; heart development [GO:0007507]; Roundabout signaling pathway [GO:0035385]
A0A0U1RQF0;P49327	-0.466845	0.306174	A0A0U1RQF0	FASN	Fatty acid synthase	2509	x		biosynthetic process [GO:0009058]	[acyl-carrier-protein] S-acetyltransferase activity [GO:0004313]; [acyl-carrier-protein] S-malonyltransferase activity [GO:0004314]; 3-hydroxypalmitoyl-[acyl-carrier-protein] dehydratase activity [GO:0004317]; 3-oxoacyl-[acyl-carrier-protein] reductase (NADPH) activity [GO:0004316]; 3-oxoacyl-[acyl-carrier-protein] synthase activity [GO:0004315]; enoyl-[acyl-carrier-protein] reductase (NADPH, B-s…
Q7Z2Z2	-0.019085	0.00366528	Q7Z2Z2	EFL1	Elongation factor-like GTPase 1 (Elongation factor Tu GTP-binding domain-containing protein 1) (Elongation factor-like 1) (Protein FAM42A)	1120	x		GTP metabolic process [GO:0046039]; mature ribosome assembly [GO:0042256]	GTPase activity [GO:0003924]; GTP binding [GO:0005525]; ribosome binding [GO:0043022]; translation elongation factor activity [GO:0003746]
H0YL11;P48735	4.10987	0.567467	H0YL11	IDH2	Isocitrate dehydrogenase [NADP], mitochondrial	312	x		isocitrate metabolic process [GO:0006102]	isocitrate dehydrogenase (NADP+) activity [GO:0004450]; magnesium ion binding [GO:0000287]; NAD binding [GO:0051287]
E9PHT9;P08758;D6RCN3;D6RBE9;D6RBL5	0.0915681	0.000336823	E9PHT9	ANXA5	Annexin	163	x		negative regulation of coagulation [GO:0050819]	calcium-dependent phospholipid binding [GO:0005544]; calcium ion binding [GO:0005509]
B4DEH8;G3V4T2;Q86U42;H0YJH9;A6NDY0	-0.555328	0.306174	B4DEH8	PABPN1	Polyadenylate-binding protein 2 (cDNA FLJ57714, highly similar to Poly(A)-binding protein 2)	168	n		positive regulation of polynucleotide adenylyltransferase activity [GO:1904247]	RNA binding [GO:0003723]
B9A018;Q53GS9;A0A087X1B2;A0A087WW31;C9J0X5;C9JIU2;F8WC91	-0.719837	0.852302	B9A018	USP39	U4/U6.U5 tri-snRNP-associated protein 2	536	x		protein deubiquitination [GO:0016579]; spliceosomal complex assembly [GO:0000245]	thiol-dependent ubiquitinyl hydrolase activity [GO:0036459]; zinc ion binding [GO:0008270]
I3L0E4;A0A087X1Q3;A0A087WYD9;A0A087WY87;A0A087WWE9;A0A087WVW9;A0A087WUD4;A0A087WTF5;A0A087WTC1;A0A087WTA0;A0A087WUW7;Q7RTZ2;Q0WX57;D6RJB6;D6RCP7;D6RBQ6;D6RA61;D6R9N7;D6R901;C9JVI0;C9JPN9;C9JLJ4;C9JJH3;C9J2P7;A8MUK1;A6NCW0	0.161756	0.0808963	I3L0E4	USP17L10	Ubiquitin carboxyl-terminal hydrolase 17-like protein 10	558	x		protein deubiquitination [GO:0016579]; ubiquitin-dependent protein catabolic process [GO:0006511]	thiol-dependent ubiquitinyl hydrolase activity [GO:0036459]
M0R2J0	0.346182	0.185242	M0R2J0	CYTH2	Cytohesin-2 (Fragment)	214	x		regulation of ARF protein signal transduction [GO:0032012]	ARF guanyl-nucleotide exchange factor activity [GO:0005086]
Q5JRI1;O75494;Q8WXF0;R4GMP8;Q6IQ42	-0.0249468	0.00366528	Q5JRI1	SRSF10	Serine/arginine-rich-splicing factor 10	172	n		regulation of RNA splicing [GO:0043484]	RNA binding [GO:0003723]
H0YLX2;Q2KHR2	0.612012	0.0289152	H0YLX2	RFX7	DNA-binding protein RFX7	1276	n		regulation of transcription, DNA-templated [GO:0006355]	DNA binding [GO:0003677]
J3KT10;Q9BW27;J3QLH0;J3QL54;F5H0W7;J3QLD4;J3KSH3;J3KRC0;J3QLV0	5.49574	2.28703	J3KT10	NUP85	Nuclear pore complex protein Nup85	611	x
E9PLD0;E7END7;Q9H0U4;P62820;H0YLJ8;H0YL94;H0YMN7;H0YNE9;P61026;Q92928;P51153;Q92930;P61006;P59190	2.74506	1.71331	E9PLD0	RAB1B	Ras-related protein Rab-1B	169	x			GTPase activity [GO:0003924]; GTP binding [GO:0005525]
A0A0A0MS07;A0A0A0MS08;P01859;P01861;P01857;P01860	1.42206	0.229924	A0A0A0MS07	IGHG1	Immunoglobulin heavy constant gamma 1 (Fragment)	295	x
K7EIN2;Q9BRJ7;K7ENA3	0.793082	0.572276	K7EIN2	NUDT16L1	Tudor-interacting repair regulator protein (Fragment)	198	x			hydrolase activity [GO:0016787]
F8VYE8;F8W0W8;P36873;F8VR82;A0A087WYY5	0.576662	0.542691	F8VYE8	PPP1CC	Serine/threonine-protein phosphatase (EC 3.1.3.16)	304	x			metal ion binding [GO:0046872]; phosphoprotein phosphatase activity [GO:0004721]
H0Y943	0.505168	0.418716	H0Y943	APBB2	Amyloid beta A4 precursor protein-binding family B member 2 (Fragment)	41	x
A0A0A0MTS7;Q8WZ42;A0A0A0MRA3	0.447271	0.337769	A0A0A0MTS7	TTN	Titin	35991	x			ATP binding [GO:0005524]; protein kinase activity [GO:0004672]
J3QS39;J3QTR3;F5H6Q2;F5GYU3;F5H2Z3;F5H265;B4DV12;F5H388;F5H747;F5GXK7;J3QKN0;Q5PY61;Q96C32;P62987;P62979;P0CG47;P0CG48;M0R1V7;Q49A90;J3QSA3;F5GZ39;M0R1M6;M0R2S1	0.445063	0.501677	J3QS39	UBB	Polyubiquitin-B (Fragment)	93	x
Q5TDX8;Q5TDX9;Q8TC36	0.424708	0.00366528	Q5TDX8	SUN5	SUN domain-containing protein 5 (Sperm associated antigen 4-like, isoform CRA_a)	122	x
F6SS63;Q8N5C8	0.38121	0.254611	F6SS63	TAB3	TAK1-binding protein 3, isoform CRA_c (TGF-beta-activated kinase 1 and MAP3K7-binding protein 3)	608	x
A0A0A0MSZ9;Q05048	0.252938	0.151578	A0A0A0MSZ9	CSTF1	Cleavage stimulation factor subunit 1 (Fragment)	345	x
J3KTL2;Q07955;J3KSR8;J3QQV5;J3KSW7	0.195724	0.156195	J3KTL2	SRSF1	Serine/arginine-rich-splicing factor 1 (Splicing factor, arginine/serine-rich 1 (Splicing factor 2, alternate splicing factor), isoform CRA_g)	253	n			RNA binding [GO:0003723]
E9PDR0;P05166;C9JQS9;E7EX59;E7ETT1;E7ETT4;E7EUY3;E9PEC3;F8WBI9;E7ENC1;H7C5C9;C9JVW9;C9JVY9;C9JAW3	0.192897	0.0608128	E9PDR0	PCCB	Propionyl-CoA carboxylase beta chain, mitochondrial	550	x			ligase activity [GO:0016874]
A0A1X7SBZ2;A0A1W2PQ51;Q92841;A0A0U1RQJ0	0.184613	0.154668	A0A1X7SBZ2	DDX17	Probable ATP-dependent RNA helicase DDX17	729	x
J3KTA4;P17844;J3KRZ1;J3QSF1;J3QRQ7;J3QR02;J3KRX8;X6RLV5	0.0994495	0.0460982	J3KTA4	DDX5	Probable ATP-dependent RNA helicase DDX5	614	x			ATP binding [GO:0005524]; helicase activity [GO:0004386]; nucleic acid binding [GO:0003676]
H7BZ55	0.0915035	0.0122329	H7BZ55	CROCC2	Putative ciliary rootlet coiled-coil protein 2	1655	x
A0A0B4J1Z1;C9JAB2;Q16629	0.0708074	0.0415052	A0A0B4J1Z1	SRSF7	Serine/arginine-rich-splicing factor 7 (Splicing factor, arginine/serine-rich 7, 35kDa, isoform CRA_a)	137	n			RNA binding [GO:0003723]; zinc ion binding [GO:0008270]
M0R050;Q9NQT4	0.0689875	0.00539765	M0R050	EXOSC5	Exosome complex component RRP46	197	x
H3BU82;F8VZ44;Q9NRG9;F8VUB6	0.0273742	0.00539765	H3BU82	AAAS	Aladin (Fragment)	358	x
A0A1B0GVB3	0.0197538	0.000336823	A0A1B0GVB3	LOC102725191	Uncharacterized protein	256	x
H3BRU6;F8VZX2;Q15366;F8VXH9;F8W0G4;F8W1G6;J3QT27;E9PFP8;P57721;H3BSS4;F8VRH0;H3BND9	-0.00107897	0.000336823	H3BRU6	PCBP2	Poly(rC)-binding protein 2 (Fragment)	301	n			RNA binding [GO:0003723]
B1AMU7;B1AMU3;Q9Y3B2;R4GNH9;R4GMQ7;B1AMU4	-0.0135767	0.000336823	B1AMU7	EXOSC1	Exosome complex component CSL4 (Fragment)	165	x
E9PQ57;P78406;E9PPG9;B0QZ36	-0.0250917	0.00462135	E9PQ57	RAE1	mRNA export factor	437	x
J3KSF5;J3QRE4;A0A087WV50;J3QL36;A0A087X0R7;Q9H4L4	-0.0553309	0.000336823	J3KSF5	SENP3	Sentrin-specific protease 3 (Fragment)	82	x			cysteine-type peptidase activity [GO:0008234]
E9PLD2;Q9H019	-0.145751	0.0417612	E9PLD2	MTFR1L	Mitochondrial fission regulator 1-like	195	x
A0A0G2JIW1;P0DMV9;P0DMV8;V9GZ37	-0.14632	0.0824581	A0A0G2JIW1	HSPA1B	Heat shock 70 kDa protein 1B	642	x			ATP binding [GO:0005524]
R4GMU7;Q6DKI1	-0.152139	0.065434	R4GMU7	RPL7L1	60S ribosomal protein L7-like 1 (Fragment)	198	x
C9JXB8;C9JNW5;P83731	-0.168095	0.0457244	C9JXB8	RPL24	60S ribosomal protein L24	121	x
E7EU96;P68400;Q8NEV1	-0.191403	0.0929305	E7EU96	CSNK2A1	Casein kinase II subunit alpha	385	x			ATP binding [GO:0005524]; protein serine/threonine kinase activity [GO:0004674]
V9GYB3;V9GYQ1;V9GY67	-0.202041	0.125364	V9GYB3	RHOF	Rho-related GTP-binding protein RhoF (Fragment)	30	x
A0A1B0GV53	-0.227447	0.00306071	A0A1B0GV53	CLEC19A	C-type lectin domain family 19 member A	186	x
A0A087X1B7;X6R700;Q9Y3Y2	-0.235607	0.109423	A0A087X1B7	CHTOP	Chromatin target of PRMT1 protein	76	x
A1L4K1	-0.263297	0.00539765	A1L4K1	FSD2	Fibronectin type III and SPRY domain-containing protein 2 (SPRY domain-containing protein 1)	749	x
H3BPG5;H3BV80;H3BMM9;H3BTC0;Q15287;H3BMS0	-0.270936	0.19613	H3BPG5	RNPS1	RNA binding protein S1, serine-rich domain, isoform CRA_c (RNA-binding protein with serine-rich domain 1)	128	n			RNA binding [GO:0003723]
M0QZJ2;P20813	-0.27371	0.00462135	M0QZJ2	CYP2B6	Cytochrome P450 2B6	255	x			heme binding [GO:0020037]; iron ion binding [GO:0005506]; monooxygenase activity [GO:0004497]; oxidoreductase activity, acting on paired donors, with incorporation or reduction of molecular oxygen [GO:0016705]
A0A0A6YYI3;A0A0B4J1V8;Q9NQ55;H7C446;A8MV53	-0.301983	0.17157	A0A0A6YYI3	PPAN-P2RY11	Protein PPAN-P2RY11	520	x
H0YLE2;H0YN52;H0YNA0;H0YN28;H0YL33;H0YMM1;H0YNP5;H0YKS4;H0YMD0;H0YMU9;H0YM50;H0YN42;P07355;A6NMY6	-0.356537	0.200807	H0YLE2	ANXA2	Annexin A2 (Fragment)	45	x			calcium-dependent phospholipid binding [GO:0005544]; calcium ion binding [GO:0005509]; cytoskeletal protein binding [GO:0008092]; phospholipase inhibitor activity [GO:0004859]
U3KQC1;A0A0A0MQU0;Q9BV38;K7EIR0;K7EML4;A0A087X237;K7EKX5	-0.448187	0.245615	U3KQC1	WDR18	WD repeat-containing protein 18 (Fragment)	394	x
A0A0G2JRP8;A0A0G2JP21;A0A087WU96;A0A087X1J6;A0A087X0V3;Q8N7Z2;H0YM25	-0.489561	0.259792	A0A0G2JRP8	GOLGA6L22	Golgin subfamily A member 6-like protein 22	632	x
G3V3G0;Q3B8N5	-0.641421	0.468328	G3V3G0	PROX2	Prospero homeobox protein 2	592	n			DNA binding [GO:0003677]
Q5SWX3;A0A0A0MS52;A0A0A0MT11;Q13555;H0Y6G2;Q8WU40	-0.744059	0.76434	Q5SWX3	CAMK2G	Calcium/calmodulin-dependent protein kinase (CaM kinase) II gamma, isoform CRA_n (Calcium/calmodulin-dependent protein kinase type II subunit gamma)	516	x			ATP binding [GO:0005524]; calmodulin binding [GO:0005516]; calmodulin-dependent protein kinase activity [GO:0004683]
A0A087WVM7;Q92979;V9GYP5;A0A087WWQ2	-0.770913	0.741105	A0A087WVM7	EMG1	Ribosomal RNA small subunit methyltransferase NEP1 (Fragment)	149	x			methyltransferase activity [GO:0008168]
A0A0C4DG98;Q8NI27;H0Y815;H7C477;H0Y7U4	-0.987595	0.742432	A0A0C4DG98	THOC2	THO complex subunit 2	1478	x
E5RGH3;E5RH24;E5RJB9;B1ANR1;H0YBN4;A0A087WTT1;E7EQV3;E7ERJ7;B1ANR0;P11940;Q13310;E5RHG7;H0YEQ8	-0.994234	0.949887	E5RGH3	PABPC1	Polyadenylate-binding protein 1 (Fragment)	108	n			RNA binding [GO:0003723]
G5E9W3;Q9UKF6	-1.13732	1.11025	G5E9W3	CPSF3	Cleavage and polyadenylation specific factor 3, 73kDa, isoform CRA_b (Cleavage and polyadenylation-specificity factor subunit 3)	647	x
Q9BVE2;A0A087X209;J3QSD7;Q9NYV4;Q14004;F8VXD2;F8VYH9;F8VZZ0;F8VTV8;F8VWX7;F8VZ51;K7EJ83;H0YAZ9;E7EUK8;E5RGN0;A0A087WZU2;F5H6Z0;Q00535;P11802;Q00534;P50750;Q96Q40;O94921;Q07002;Q00536;Q00537	-1.64106	0.968713	Q9BVE2	CDK13	CDC2L5 protein (Cyclin-dependent kinase 13)	324	x			ATP binding [GO:0005524]; protein serine/threonine kinase activity [GO:0004674]
J3QT28;O43684;J3QSX4	-1.71805	1.29939	J3QT28	BUB3	Mitotic checkpoint protein BUB3 (Fragment)	278	x
F8WDT8;G3V0G3;Q9NY93;H7C3E9;F8WEI3	-2.1255	1.29939	F8WDT8	DDX56	Probable ATP-dependent RNA helicase DDX56	185	x			ATP binding [GO:0005524]; nucleic acid binding [GO:0003676]
K7EJM5;A0A087WX29;K7EN94;B1AKP7;G3V162;A0A087X260;A0A087WYY0;Q13148	-2.27562	1.71331	K7EJM5	TARDBP	TAR DNA-binding protein 43 (Fragment)	201	n			RNA binding [GO:0003723]
K7ELV2;Q96EE3;K7ENI5;K7EP88;K7EPZ5	-2.56893	1.65892	K7ELV2	SEH1L	Nucleoporin SEH1 (Fragment)	263	x
J3KT25	-3.23065	0.329706	J3KT25	IMPACT	Protein IMPACT (Fragment)	180	x
F5H2G5;Q9BQI9;F5H065	-4.49358	1.65412	F5H2G5	NRIP2	Nuclear receptor-interacting protein 2 (Fragment)	175	x
